1                   **Brain microRNA expression associated with social evolution in bees**

2  
3           Karen M. Kapheim<sup>1\*</sup>, Beryl M. Jones<sup>2ϕ</sup>, Eirik Søvik<sup>3</sup>, Eckart Stolle<sup>4</sup>, Robert M. Waterhouse<sup>5</sup>,  
4                                   Guy Bloch<sup>6</sup>, Yehuda Ben-Shahar<sup>7</sup>

5  
6           <sup>1</sup> Department of Biology, Utah State University, Logan, UT 84322, USA

7  
8           <sup>2</sup> Program in Ecology, Evolution, and Conservation Biology, University of Illinois at Urbana-  
9           Champaign, Urbana, IL 61801, USA

10  
11           <sup>3</sup> Department of Science and Mathematics, Volda University College, 6100 Volda, Norway

12  
13           <sup>4</sup> Martin-Luther-Universität Halle-Wittenberg, Institut für Biologie, Hoher Weg 8, Halle (Saale),  
14           Germany

15  
16           <sup>5</sup> Department of Ecology and Evolution, University of Lausanne and Swiss Institute of  
17           Bioinformatics, 1015 Lausanne, Switzerland

18  
19           <sup>6</sup> Department of Ecology, Evolution and Behavior, The Alexander Silberman Institute of Life  
20           Sciences, The Hebrew University of Jerusalem, Jerusalem, Israel

21  
22           <sup>7</sup> Department of Biology, Washington University in St. Louis, St. Louis, MO 63130, USA

23  
24           ϕ Current affiliation: Department of Ecology and Evolutionary Biology, Princeton University,  
25           Princeton, NJ, USA

26  
27           \* Corresponding author:  
28           Karen M. Kapheim  
29           Biology Department  
30           Utah State University  
31           5305 Old Main Hill  
32           Logan, UT 84322, U.S.A.  
33           [karen.kapheim@usu.edu](mailto:karen.kapheim@usu.edu)  
34           +1-435-797-0685

35  
36

37 **ABSTRACT**

38 Evolutionary transitions to a social lifestyle in insects are associated with lineage-specific  
39 changes in gene expression, but the key nodes that drive these regulatory changes are largely  
40 unknown. We tested the hypothesis that changes in gene regulatory function associated with  
41 social evolution are facilitated by lineage-specific microRNA (miRNA) regulatory function.  
42 Genome scans across 12 bees showed that miRNA copy number is highly conserved and is not  
43 associated with variation in social organization. However, deep sequencing of small RNAs of six  
44 bee species revealed a substantial proportion (20-35%) of miRNAs are expressed in the brains of  
45 a single species, and many of these do not have identifiable homologs in any other species.  
46 Lineage-specific miRNAs disproportionately target lineage-specific genes, and have lower  
47 expression levels than more evolutionarily conserved miRNAs. Consistent with our hypothesis,  
48 the predicted targets of lineage-specific miRNAs are enriched for genes related to social  
49 behavior, such as caste-biased genes, in social species, but they are either not enriched for or  
50 significantly depleted of genes under positive selection. Together, these results suggest that novel  
51 miRNAs may contribute to lineage-specific patterns of molecular evolution associated with the  
52 origins and elaborations of eusociality. Our analyses also lend support to earlier hypotheses  
53 concerning miRNA origins from a relatively understudied taxonomic group, and reveal  
54 important differences in the evolution and assimilation of novel miRNAs between mammals and  
55 insects.

56

57 **INTRODUCTION**

58 Eusociality, the most complex form of social organization, has evolved several times in insects  
59 from the order Hymenoptera. In its most basic form, this lifestyle involves reproductive queens

60 living with their worker daughters who forego direct reproduction of their own to cooperatively  
61 defend the nest, care for their siblings, and forage for the colony (Wilson 1971). Due to the  
62 complex nature of this lifestyle, the evolution of eusociality likely requires modification of  
63 molecular pathways related to development, behavior, neurobiology, physiology, and  
64 morphology (Robinson and Ben-Shahar 2002; Toth and Robinson 2007; Bloch and Grozinger  
65 2011; Sumner et al. 2018). The evolution of eusociality is thus expected to involve both genetic  
66 changes as well as changes in the way the genome responds to the environment (Robinson and  
67 Ben-Shahar 2002; Johnson and Linksvayer 2010). It is therefore unsurprising that recent studies  
68 aimed at identifying the genomic signatures of eusocial evolution in insects have found that  
69 social species share an increased capacity for gene regulation (Simola et al. 2013; Kapheim et al.  
70 2015). Evidence for this comes from signatures of rapid evolution of genes involved in  
71 transcription and translation, gene family expansions of transcription factors, and increasing  
72 potential for DNA methylation and transcription factor binding activity in conserved genes.  
73 Interestingly, while these types of regulatory changes are common to independent origins and  
74 elaborations of eusociality, the specific genes and regulatory elements involved are unique to  
75 each lineage in which eusociality evolved (Kapheim et al. 2015). This suggests that lineage-  
76 specific processes are influential in generating new patterns of gene regulation that contribute to  
77 social behavior.

78

79 Small, non-coding RNAs such as microRNAs (miRNAs) may be an important source of  
80 regulatory novelty associated with the evolution of phenotypic complexity, including eusociality.  
81 MiRNAs are short (~21-22 nt) noncoding RNAs that regulate protein-coding genes through post-  
82 transcriptional binding to the 3' UTR region of messenger RNA (mRNA) transcripts, in most

83 cases preventing translation or causing degradation (Bartel 2018). Each miRNA can target  
84 dozens to hundreds of mRNAs, and therefore miRNAs have enormous potential to regulate gene  
85 networks (Filipowicz et al. 2008; Friedman et al. 2009; Bartel 2018). Like mRNAs, miRNAs are  
86 spatially- and temporally-specific in their expression patterns. Thus, complex changes in gene  
87 regulation can be achieved with relatively minor changes in miRNA expression. This can result  
88 in major phenotypic shifts or fine-tuning of phenotypic optimization (Bartel 2018). Novel  
89 miRNAs can originate in a variety of genomic features, including exons and introns of protein-  
90 coding and non-coding RNA genes, transposable elements, pseudogenes, or intergenic regions,  
91 and thus emerge and disappear over relatively rapid timescales (Chen and Rajewsky 2007; Lu et  
92 al. 2008; Berezikov 2011; Zhu et al. 2012; Meunier et al. 2013). It is thus not surprising that  
93 expansion of the miRNA repertoire is associated with the evolution of morphological complexity  
94 across the tree of life (Grimson et al. 2008; Heimberg et al. 2008; Wheeler et al. 2009;  
95 Christodoulou et al. 2010; Berezikov 2011).

96  
97 There is accumulating evidence for a role of miRNAs in regulating the social lives of insects.  
98 MiRNAs have been identified in the genomes of most major insect groups (Asgari 2013; Quah et  
99 al. 2015; Ylla et al. 2016), including several ant and bee species (Weaver et al. 2007; Bonasio et  
100 al. 2010; Kocher et al. 2013; Patalano et al. 2015; Sadd et al. 2015). Bioinformatic scans of  
101 insect genomes have identified candidate miRNAs present in the genomes of social, but not  
102 solitary, insects (Søvik et al. 2015). While most miRNAs seem to be conserved in major lineages  
103 of insects (Søvik et al. 2015; Ylla et al. 2016), expression levels have been found to vary across  
104 individuals performing different social functions, such as between workers performing different  
105 tasks in honey bees (*Apis mellifera*) (Behura and Whitfield 2010; Greenberg et al. 2012; Liu et

106 al. 2012). MiRNAs may also play a role in caste determination, as queen- and worker-destined  
107 larvae express different sets of miRNAs throughout development in honey bees (Weaver et al.  
108 2007; Shi et al. 2015; Ashby et al. 2016) and bumble bees (*Bombus terrestris*) (Collins et al.  
109 2017). Additionally, miRNAs play a role in regulating some of the physiological correlates of  
110 social behavior in honey bees, including activation of ovaries in queens and workers (MacEdo et  
111 al. 2016) and response to the reproductive protein *vitellogenin* (Nunes et al. 2013). Together,  
112 these studies suggest that miRNAs could play a role in the evolution of eusociality through their  
113 effects on gene regulatory networks that are involved in traits important for social behavior. A  
114 rigorous test of this hypothesis requires comparisons of the presence, expression, and function of  
115 miRNAs across related species that vary in social organization. However, none of the previous  
116 studies of insect miRNAs have included solitary species that are closely related to eusocial  
117 insects, and thus representative of the ancestors from which sociality evolved.

118

119 Here we present a comprehensive comparative analysis of miRNAs across bee species that vary  
120 in social organization. We first looked for miRNA repertoire expansions associated with  
121 eusociality by scanning the genomes of 12 bee species for known miRNAs, and statistically  
122 evaluating copy number of each miRNA type with regard to differences in sociality in a  
123 phylogenetic model. We then described and compared miRNAs expressed in the brains of six  
124 bee species from three families that include repeated origins of eusociality. In our analysis, we  
125 identified shared and lineage-specific miRNAs, their evolutionary histories, and their predicted  
126 gene targets. We then tested the hypothesis that changes in gene regulatory function associated  
127 with social evolution are facilitated by lineage-specific miRNA regulatory function. We tested  
128 three predictions of this hypothesis: (1) miRNAs that play a role in social behavior should target

129 different genes in solitary and social species. (2) If lineage-specific miRNAs are assimilated into  
130 ancestral gene networks, then their predicted target genes should be ancient and conserved. (3) If  
131 lineage-specific miRNAs play a role in social evolution, then their predicted targets should be  
132 enriched for genes that play a role in social behavior (e.g., caste-biased expression) or genes that  
133 are under selection in social species.

134

## 135 **MATERIALS AND METHODS**

### 136 **Sample Acquisition**

137 We used adult females from six bee species for our study. *Megalopta genalis* samples were  
138 collected on Barro Colorado Island, Panama in 2015 and exported to the U.S.A. under permit  
139 SEX/A-37-15. *Nomia melanderi* samples were collected in Touchet, WA, U.S.A. with  
140 permission from private land owners. *Megachile rotundata* samples were collected from Logan,  
141 UT, U.S.A. on the Utah State University campus. *Bombus impatiens* samples were collected  
142 from a commercial colony purchased from BioBest. *Bombus terrestris* samples were collected  
143 from Pollination Services Yad-Mordechai, Kibbutz Yad-Mordechai, Israel. *Apis mellifera*  
144 samples were collected from typical field hives in Urbana-Champaign, IL and the Tyson  
145 Research Field Station, MO, U.S.A. All samples were flash-frozen in liquid nitrogen upon  
146 collection and stored at -80 °C until dissection.

147

### 148 **RNA Isolation and Sequencing**

149 Head capsules from the *B. impatiens*, *M. genalis*, and *N. melanderi* samples were dissected after  
150 incubation in RNALater ICE (Ambion) to remove the entire brain. We used the mirVana miRNA  
151 Isolation kit with phenol (Ambion) to isolate total RNA from individual brains. Total RNA was

152 sent to the University of Illinois Roy J. Carver Biotechnology Center for library preparation and  
153 sequencing. Libraries were prepared with the Illumina TruSeq Small RNA Sample Preparation  
154 kit. Libraries were pooled, quantitated by qPCR, and sequenced on one lane for 51 cycles on a  
155 HiSeq 2500, using TruSeq SBS sequencing kit version 2. Sequencing yielded a mean of  
156 19,524,877 ( $\pm$  2,545,208 s.d.) reads per sample.

157  
158 Whole brains of *A. mellifera*, *B. terrestris*, and *M. rotundata* were dissected from frozen heads.  
159 Total RNA from individual brains were isolated by using the TRIzol reagent (Thermo Fisher  
160 Scientific). All subsequent small-RNA sequencing steps were performed by the Genome  
161 Technologies Access Center at Washington University, using their Illumina TrueSeq pipeline. In  
162 short, total RNA samples were size fractionated and multiplexed. Single-end small RNA libraries  
163 were prepared by using the SMARTer kit (Clontech). Up to 12 barcoded libraries from a single  
164 species were run on a single Illumina HiSeq 2500 lane.

165

### 166 **miRNA Discovery and Quantification**

167 We used miRDeep2 (Friedländer et al. 2012) to identify and quantify miRNAs expressed in the  
168 brains of each species. We used a three-step process of miRNA detection in order to identify  
169 homologous miRNAs between species. For the first step, we generated a set of mature miRNA  
170 sequences previously described in other insect species (Table S1). Reads for each sample were  
171 quality filtered (minimum length 18, removal of reads with non-standard bases), adapter-  
172 trimmed, and aligned to the species genome (Table S2) with the mapper.pl script. Approximately  
173 60-84% of reads successfully mapped.

174

175 We then identified known and novel miRNAs in each sample with the miRDeep2.pl script, using  
176 our curated set of insect miRNAs (Table S1) as known mature sequences. We followed this with  
177 quantification of the miRNAs using the quantifier.pl script. This generated a set of known and  
178 novel miRNAs in each sample, along with quantified expression information for each. We then  
179 filtered the novel miRNAs in each species according to the following criteria: no rRNA/tRNA  
180 similarities, minimum of five reads each on the mature and star strands of the hairpin sequence,  
181 and a significant randfold p-value ( $p < 0.05$ ). Randfold describes the RNA secondary structure of  
182 potential pre-miRs (Friedländer et al. 2012).

183

184 We used these filtered miRNAs in a second run of detection and quantification. We added the  
185 mature sequences of the novel miRNAs from each species to our set of known miRNAs, and  
186 repeated the pipeline above. This allowed detection of homologous miRNAs (based on matching  
187 seed sequences) that are not represented in miRBase across our species. We applied the same set  
188 of filtering criteria as for our first run.

189

190 Some of the novel miRNAs may exist in the genomes of other bees, even if they are not  
191 expressed. We used blastn (-perc\_identity 50 -evalue 1e-5) to search for homologous precursor  
192 miR (pre-miR) sequences in 12 bee genomes (Table S2) for each of the novel miRNAs without a  
193 matching seed sequence.

194

### 195 **miRNA Localization**

196 We characterized the location of each known and novel miRNA in respective genome assembly  
197 in relation to genes and transposable elements. We used bedtools intersect (Quinlan and Hall



2010) to find overlap with predicted gene models (Table S3), and repetitive element  
repeatmasker (Smit et al. 2013) annotations from previously established repeat libraries  
(Kapheim et al. unpublished; Elsik et al. 2014; Kapheim et al. 2015a; Sadd et al. 2015; Kapheim  
et al. 2019).

202

### 203 **Target Prediction**

204 We used computational methods to predict targets of each miRNA in each species. We used  
205 bedtools flank and getfasta (Quinlan and Hall 2010) to extract a 500 bp region downstream from  
206 each gene model, following previous studies (Ashby et al. 2016) and an average 3' UTR region  
207 of 442 nt in *Drosophila melanogaster* (Grün et al. 2005). We used these as potential target sites  
208 in miRanda (Enright et al. 2004) and RNAhybrid (Krüger and Rehmsmeier 2006) target  
209 prediction analyses. miRanda v3.3 was run with a minimum energy threshold of -20, a minimum  
210 score of 140, and strict alignment in the seed region (parameters -en -20 -sc 140 -strict). We also  
211 used RNAhybrid v2.1.2 with a minimum free energy threshold of -20 and the fly 3' UTR set was  
212 used to estimate xi and theta values (These are the position and shape parameters of the value  
213 distribution from which p-values are calculated). We kept only miRNA-target gene pairs that  
214 were predicted by both programs with  $p < 0.01$ .

215

### 216 **Target Age and Functional Enrichment**

217 We explored the taxonomic ages and putative functions of predicted target genes. Gene ages  
218 were determined using orthogroups from OrthoDB v9 (Zdobnov et al. 2017), which includes *A.*  
219 *mellifera*, *B. impatiens*, *B. terrestris*, and *M. rotundata*. OrthoDB delineates orthologs by  
220 clustering gene best reciprocal hits (BRHs) between all species pairs, first with triangulation of

221 BRHs and then addition of in-paralogous groups and genes to build clusters of orthologs. Gene  
222 sets of *M. genalis* and *N. melanderi* were mapped to Metazoa-level (330 species) orthogroups  
223 following the same procedure as for BRH clustering allowing genes to join existing orthogroups  
224 when all BRH criteria are met. The age of each gene from the six bee species was inferred from  
225 the taxonomic breadth of all species in each orthogroup, from Vertebrata (at least one of 172  
226 vertebrates), to Metazoa (at least one of 25 non-arthropod and non-vertebrate metazoans), to  
227 Arthropoda (at least one of 17 non-insect arthropods), to Insecta (at least one of 16 non-  
228 holometabolous insects), to Holometabola (at least one of 68 non-hymenopteran holometabolous  
229 insects), to Hymenoptera (at least one of 7 non-Aculeata hymenopterans), to Aculeata (at least  
230 one of 13 non-Apoidea Aculeata), to Apoidea (at least one of 11 other Apoidea), and finally,  
231 genes without identifiable orthologs were labeled ‘Unique’.

232  
233 Gene Ontology (GO) terms for each species were derived from a previous study (Kapheim et al.  
234 2015), with the exception of *B. impatiens*, for which GO terms were assigned based on reciprocal  
235 blastp (evalue <  $1e^{-5}$ ) between two sets of gene models (OGS v1.2 and OGS v1.0). Functional  
236 enrichment was performed with the GOstats package (Gentleman and Falcon 2013) in R (R Core  
237 Team 2016). We included all terms enriched at a value of unadjusted  $p < 0.1$  to allow for more  
238 inclusivity in our cross-species comparisons.

239

#### 240 **Enrichment tests of lineage-specific miRNA targets with previous studies**

241 For each species, brain or head gene expression datasets related to socially relevant phenotypes  
242 (e.g., caste) and genes under selection were compared against targets of lineage-specific  
243 miRNAs. Differential expression lists for *A. mellifera* included those from Grozinger et al.

244 (2007) (queen vs. worker, reproductive worker vs. sterile worker, queen vs. reproductive  
245 worker), Whitfield et al. (2003) (nurse vs. forager), Alaux et al. (2009) (nurse vs. forager), and  
246 Wheeler et al. (2013) (*vitellogenin* RNAi vs. control). For *B. terrestris*, differential expression  
247 lists included three pairwise comparisons from Harrison et al. (2015) (queen vs. worker,  
248 reproductive worker vs. sterile worker, queen vs. reproductive worker), as well as a comparison  
249 between reproductive and sterile workers from Marshall et al. (2019). (The Harrison et al. dataset  
250 was from whole body, rather than just head or brain.) For *M. genalis* caste data, RNAseq reads  
251 from Jones et al. (2017) (NCBI PRJNA331103) were trimmed using Trimmomatic (v. 0.36) and  
252 aligned to an unpublished genome assembly of *M. genalis* (NCBI PRJNA494872) using STAR  
253 (v. 2.5.3). Reads were mapped to gene features using the featureCounts function of the Subread  
254 package (v. 1.5.2). Remaining differential expression analysis followed the methods of Jones et  
255 al. (2017) using edgeR (Robinson et al. 2010) with tagwise dispersion estimates and FDR  
256 correction. The complete list of included studies and gene lists are in Table S4.

257  
258 In addition to gene expression comparisons, multiple datasets identifying genes under selection  
259 in bee species or across multiple social lineages of bees were tested for enrichment of lineage-  
260 specific miRNA targets. Species-specific selection datasets were used for *A. mellifera* (Harpur et  
261 al. 2014), *B. impatiens* (Harpur et al. 2017), *M. genalis* (Kapheim et al. unpublished), and *N.*  
262 *melanderi* (Kapheim et al. 2019). In addition, genes under selection in social relative to solitary  
263 lineages identified by Woodard et al. (2011) and Kapheim et al. (2015) were tested against each  
264 species' set of lineage-specific miRNA targets. The complete list of included studies and gene  
265 lists are in Table S4.

266

267 In cases when we needed to identify orthologous genes across species, we used reciprocal blastp  
268 (evalue <  $10e^{-5}$ ). Only genes with putative orthologs were included in the final tested sets of  
269 genes. Hypergeometric tests (using phyper in R) were used to test for significance of over- or  
270 under-enrichment between each pair of lists. The representation factor (RF) given represents the  
271 degree of overlap relative to random expectation (RF=1).

272

### 273 **miRNA Diversification**

274 We explored the diversification of miRNAs that have been previously implicated in social  
275 behavior (miR-13b, miR-276, miR-6001-3p) or which are expressed in social bees, but not  
276 solitary bees (miR-305). We performed multiple sequence alignment with the web version of  
277 Clustal Omega with default settings (Sievers et al. 2011), and generated a Neighbour-joining  
278 phylogenetic tree in Newick format.

279

280 We also performed genome scans for small RNAs across 12 bee genomes (Table S2) using  
281 covariance models implemented with Infernal cmsearch using the gathering threshold for  
282 inclusion (--cut\_ga) (Cui et al. 2016) to find all Rfam accessions in each bee genome. We used  
283 bedtools intersect to identify overlap between small RNAs identified through cmsearch and gene  
284 models. We then used Spearman rank regressions to test for significant associations between  
285 miRNA copy number and social biology. We categorized each species as either solitary,  
286 facultative basic eusociality, obligate basic eusociality, or obligate complex eusociality following  
287 Kapheim et al. (2015). We used the ape package (Paradis et al. 2004) in R (R Core Team 2016)  
288 to calculate phylogenetic independent contrasts for both social organization and miRNA copy

289 number, cor.test to implement the Spearman's rank correlation, and p.adjust with the Benjamini-  
290 Hochberg method (method = "BH") to correct for multiple comparisons.

291

## 292 **RESULTS**

### 293 **Low levels of miRNA copy number variation among bee genomes**

294 Our genome scans revealed very little variation in copy number of most miRNAs among bee  
295 genomes. Of the 50 miRNA Rfam accessions, half had the same number of copies in all 12 bee  
296 genomes (1 or 2 copies) (Table S5). The mean copy number across all miRNAs in all bee  
297 genomes was  $1.19 \pm 0.74$ . Seven of the Rfam miRNAs were detected in a single bee species, but  
298 mostly at low copy numbers (1-3). One exception was miR-1122, for which we found 70 copies  
299 in *M. genalis*, but no copies in any of the other species. We did not find any significant  
300 associations between miRNA copy number and social organization (Table S5).

301

### 302 **Expressed miRNA diversity in bee brains**

303 We identified 97-245 known and novel miRNAs expressed in the brains of each of our six  
304 species (Table S6). The majority of these were located in intergenic regions or in introns (Table  
305 1). Each species had at least one miRNA that originated from exons of protein-coding genes and  
306 repetitive DNA (Table 1). Most of the overlap between miRNA precursors and repetitive DNA  
307 corresponded to uncharacterized repeat elements, with very few overlaps with well characterized  
308 transposons or retrotransposons (Table 1).

309

310 Most of the detected miRNAs in each species had known homologs in at least one other species.  
311 However, each species had a substantial proportion (20-35%) of miRNAs with lineage-specific

312 expression in the brain (Table 1; Fig. 1A), 24-72% of which did not have any known homologs  
 313 in other species (Table 1). We defined lineage-specific miRNAs as those miRNAs with lineage-  
 314 specific expression and for which no seed match with a known mature miRNA was identified  
 315 (columns 6 and 7 in Table 1), because these show the most evidence of being real miRNAs that  
 316 are unique to a particular species. (Sequence similarity of pre-miRs in the genome of other bee  
 317 species is not sufficient evidence that a mature miRNA is transcribed.) Lineage-specific miRNAs  
 318 had significantly lower expression levels in each species (t-tests: *A. mellifera*,  $p = 3.81e^{-05}$ , *B.*  
 319 *impatiens*,  $p = 0.003$ , *B. terrestris*,  $p = 0.006$ , *M. genalis*,  $p = 0.0003$ , *M. rotundata*,  $p = 8.00e^{-05}$ ,  
 320 *N. melanderi*,  $p = 0.02$ ).

321 **Table 1.** Localization of miRNAs in the genomes of six bee species. Numbers not in parentheses  
 322 represent features on the same strand as the pre-miR. Numbers in parentheses indicate strand  
 323 mismatch. Some pre-miRs overlapped with one or more genes on both the same and opposite  
 324 strands, and are thus counted twice (*A. mellifera* and *M. genalis* – 1, *B. impatiens* – 5, *B.*  
 325 *terrestris* – 4, *N. melanderi* – 3). Seed match – Mature miR had a seed match with a known miR;  
 326 Pre-miR – Successful blastn hit to the pre-miR sequence in at least one other bee genome;  
 327 Unique – No homolog was found in other species (seed match to mature or blastn hit to pre-  
 328 miR).

| Species                    | Sociality            | Expressed miRs | miRs with lineage-specific expression in the brain |            |         |        | Location in the genome |       |         |                      |                                |
|----------------------------|----------------------|----------------|----------------------------------------------------|------------|---------|--------|------------------------|-------|---------|----------------------|--------------------------------|
|                            |                      |                | Total                                              | Seed match | Pre-miR | Unique | Intergenic             | Exon  | Intron  | Transposable element | Uncharacterized repetitive DNA |
| <i>Apis mellifera</i>      | Complex eusocial     | 97             | 25                                                 | 0          | 15      | 10     | 45                     | 5     | 38 (10) | 0                    | 0                              |
| <i>Bombus impatiens</i>    | Basic eusocial       | 245            | 49                                                 | 6          | 31      | 12     | 129                    | 4 (1) | 89 (27) | 7                    | 32                             |
| <i>Bombus terrestris</i>   | Basic eusocial       | 150            | 31                                                 | 2          | 21      | 8      | 76                     | 1 (1) | 56 (20) | 13                   | 36                             |
| <i>Megalopta genalis</i>   | Facultative eusocial | 105            | 37                                                 | 7          | 5       | 25     | 63                     | 3     | 30 (10) | 2                    | 28                             |
| <i>Megachile rotundata</i> | Solitary             | 99             | 27                                                 | 9          | 0       | 18     | 48                     | 8 (1) | 37 (5)  | 2                    | 15                             |
| <i>Nomia melanderi</i>     | Solitary             | 97             | 29                                                 | 5          | 3       | 21     | 50                     | 8     | 34 (8)  | 2                    | 27                             |

330 Lineage-specific miRNAs were localized both within genes and intergenically. The proportion of  
331 lineage-specific miRNAs that are intragenic or intergenic was similar to miRNAs with homologs  
332 for every species except *N. melanderi*, for which a disproportionate number of lineage-specific  
333 miRNAs were intragenic ( $\chi^2 = 4.78$ ,  $p = 0.03$ ). Genes that serve as hosts for intragenic lineage-  
334 specific miRNAs were not significantly older than would be expected by chance (i.e., belong to  
335 orthogroups shared with vertebrates) in any species (hypergeometric tests:  $p = 0.14-0.76$ ). Across  
336 all species, genes that serve as hosts for intragenic lineage-specific miRNAs were not  
337 significantly older than genes that host miRNAs with known homologs ( $\chi^2$  tests:  $p = 0.05-0.89$ ).

338

339 Of the miRNAs with mature miRNA homologs, most were expressed in all six species, and we  
340 detected few family-specific expression patterns of miRNAs (Table S6). For example, miR-3049  
341 and miR-3786 were only detected in the bees from the family Apidae (*A. mellifera*, *B. impatiens*,  
342 *B. terrestris*). miR-3049 is predicted to target a neurotransmitter-gated ion-channel in all three  
343 species (OG EOG091G0R20), and a histone acetyltransferase (OG EOG091G00D2), a zinc-  
344 finger protein (OG EOG091G0N0A), a leucine-rich repeat (OG EOG091G01ZI), and a sodium-  
345 potassium-calcium exchanger (OG EOG091G0M5C) in both *Bombus* species. The two *Bombus*  
346 species shared a cytochrome P450 (OG EOG091G06KN) as a predicted target of miR-3786, but  
347 did not share predicted targets with *A. mellifera*. We identified a miRNA (nmel-  
348 scaffold2759\_cov63\_18669) without a known seed match that was only expressed in the two  
349 halictid bees (*N. melanderi*, *M. genalis*) and is predicted to target kinase associated proteins in  
350 both species.

351

352 We identified one miRNA (miR-305) that was expressed in the brains of each of the social, but  
353 not the solitary species. Although we did not detect expression of miR-305 in the two solitary  
354 species, *M. rotundata* and *N. melanderi*, genome scans of each species against the Rfam database  
355 suggested all bee species have one copy of this miRNA (Table S5). Predicted targets of miR-305  
356 differed across species. *Oxysterol* (OG EOG091G0FV2) was a common target among the  
357 (social) Apidae bees, but was not among the targets for *M. genalis*. However, *arylformamidase*  
358 (OG EOG091G0KT8), which is also involved in lipid metabolism and transport, was a predicted  
359 target in *M. genalis*. *Synaptobrevin* (OG EOG091G0MPE), which is involved in synaptic  
360 plasticity and neurotransmitter release, was a predicted target of miR-305 in *B. impatiens*.  
361

### 362 **miRNAs associated with honey bee social behavior are conserved across bee species**

363 As existing gene networks become co-opted for social evolution, we should expect novel  
364 regulatory connections between existing miRNAs and protein-coding genes. If social evolution  
365 involves miRNA-mediated changes in gene regulatory networks, then miRNAs with functions in  
366 social behavior should target different genes in social and solitary species. We tested this  
367 prediction by comparing the diversification and targets of three miRNAs that have been  
368 repeatedly associated with social behavior in bees. miR-6001-3p is upregulated in queen-  
369 destined larvae, compared to worker-destined larvae, in both *A. mellifera* (Shi et al. 2015) and *B.*  
370 *terrestris* (Collins et al. 2017). However, we only detected brain expression of this miRNA in *M.*  
371 *rotundata*, despite the fact that the honey bee miR-6001-3p was included in our known set of  
372 miRNAs. Because this miRNA does not have an accession in Rfam, we were unable to verify  
373 presence or copy number of this miRNA across the bee species. Additional targeted sequencing  
374 is needed to determine the role of this miRNA in adult bee brains.



375  
376 MiR-276 is upregulated in honey bee worker ovaries (MacEdo et al. 2016) and in queen-destined  
377 larvae (Shi et al. 2015; Ashby et al. 2016). Our genome scans revealed that each bee species has  
378 a single copy of this miRNA, and we detected expression in the brains of each of our six focal  
379 species. Multiple alignment of the expressed mature miRNA revealed almost no sequence  
380 variation across the species. There were few shared gene targets across the six species, but the  
381 functional enrichment of predicted miR-276 targets was similar among species. Target genes in  
382 each species were enriched for cell signaling, though the specific pathways differed. *A. mellifera*,  
383 *B. impatiens*, and *M. rotundata* targets were enriched for insulin receptor binding, and the two  
384 halictids (*Megalopta genalis* and *N. melanderi*) were enriched for G-protein coupled receptor  
385 signaling. All species except *N. melanderi* shared enrichment for functions related to protein  
386 translation, including translation, protein-containing complex binding, structural constituent of  
387 ribosome, peptide biosynthetic process, peptide metabolic process, and amide biosynthetic  
388 process.

389  
390 MiR-13b is differentially expressed across honey bee castes in different life stages and tissues. It  
391 is upregulated in worker ovaries compared to queen ovaries (MacEdo et al. 2016),  
392 downregulated in queen-destined larvae compared to worker-destined larvae (Shi et al. 2015;  
393 Ashby et al. 2016), and downregulated in workers performing nursing tasks compared to  
394 foragers (Liu et al. 2012). This miRNA has expanded and diversified among the bees, with three  
395 major clades containing at least one copy from each species (Fig. 1B). As with miR-276, there  
396 was very little overlap in predicted targets among species. Just one gene, the *beta subunit of*  
397 *nuclear transcription factor Y*, is predicted to be a target of miR-13b in each of the social

398 species. However, there were more similarities across species at the functional level (Table S7).

399 All species had enrichment for transcription factor activity, and all species except the two

400 halictid bees had significant enrichment for genes involved in ecdysone-mediated signaling.

401 Within the family Halictidae, the predicted targets of miR-13b for *M. genalis* were enriched for

402 genes related to neurotransmitter-gated ion channel activity, while *N. melanderi* targets were

403 enriched for phospholipid metabolic processes.

404

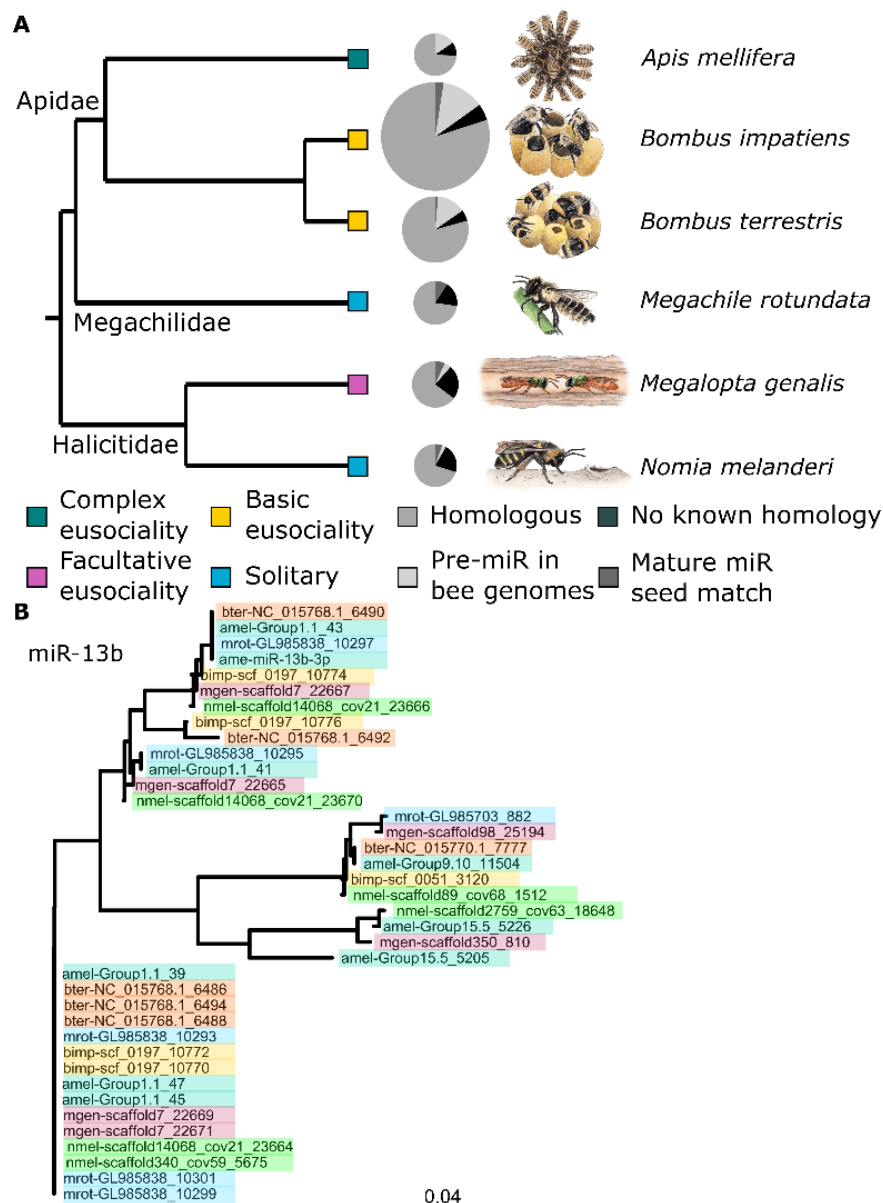

405

406 **Fig. 1. Diversity of miRNAs expressed in the brains of six bee species.** (A) Homologous and  
407 lineage-specific miRNAs expressed in the brain of each species. The three types of homology  
408 (shades of grey) correspond to those in Table 1. Black – has not been previously detected in  
409 other species. Pie size corresponds to number of miRNAs detected from small RNA sequencing.  
410 Boxes indicate social organization (green – complex eusociality, yellow – basic eusociality, pink  
411 – facultative eusociality, blue – solitary). Phylogenetic relationships are following previous  
412 studies (Cardinal and Danforth 2011; Sadd et al. 2015; Branstetter et al. 2017). (B)  
413 Diversification of miR-13b across six bee species. Each miRNA has a matching seed sequence to  
414 ame-miR-13b-3p (miRBase v21). Tip labels are the name of each miRNA expressed in the brain,  
415 beginning with a four letter code for species. Different species are also indicated by colors. Scale  
416 indicates substitution rate.  
417

418 **Lineage-specific miRNAs preferentially target lineage-specific genes and genes with caste-**  
419 **biased expression, but not genes under selection**

420 If lineage-specific changes in gene regulatory function associated with social evolution are  
421 facilitated by novel miRNAs inserted into existing gene networks, then the predicted targets of  
422 lineage-specific miRNAs should be highly conserved and enriched for genes with a known  
423 function in social evolution. Most of the predicted mRNA targets of lineage-specific miRNAs  
424 were highly conserved and belonged to orthogroups shared by vertebrates (Fig. 2A; Table S8).  
425 However, most of the genes in each genome are also highly conserved, and there was not a  
426 significant enrichment for conserved genes among predicted targets of lineage-specific miRNAs,  
427 beyond what would be expected by chance ( $p > 0.99$ ). We did, however, find a significant  
428 enrichment for lineage-specific genes that are unique to each species among the predicted targets  
429 of lineage-specific miRNAs ( $p = 0.02 - 1.48e^{-12}$ ), indicating that novel miRNAs are more likely  
430 to target novel genes than would be expected by chance (Fig. 2A; Table S8).

431  
432 We found mixed support for the prediction that novel miRNAs should target genes that function  
433 in social behavior and evolution. The predicted targets of lineage-specific miRNAs were  
434 enriched for genes that are differentially expressed between castes in the social Apidae (*A.*

435 *mellifera* and *B. terrestris*), but not Halictidae (*M. genalis*) (Fig. 2B; Table S4). In *A. mellifera*,  
436 this included genes that are upregulated in the brains of reproductive workers, compared with  
437 sterile workers (RF = 3.4,  $p = 0.007$ ) and queens (RF = 1.6,  $p = 0.015$ ) (Grozinger et al. 2007), as  
438 well as genes upregulated in the brains of foragers compared with nurses (RF = 2.8,  $p = 0.011$ )  
439 (Whitfield et al. 2003). However, there was not significant enrichment for genes differentially  
440 expressed between nurse and forager honey bee brains in a later study ( $p = 0.09$ ) (Alaux et al.  
441 2009). In *B. terrestris*, we find significant overlap between the predicted targets of lineage-  
442 specific miRNAs and genes that are upregulated in worker bodies, compared to queens (RF = 2,  
443  $p = 0.013$ ). We did not find significant overlap with genes differentially expressed between  
444 reproductive and sterile workers, but this was a much more limited gene set ( $p = 0.39$ ) (Marshall  
445 et al. 2019). To our knowledge, there are no studies of gene expression differences between *B.*  
446 *impatiens* castes, so we could not evaluate target overlap with caste-biased genes in this species.  
447 We do not find significant enrichment for caste-biased genes in the brains of the facultatively  
448 eusocial halictid *M. genalis* ( $p = 0.25$ ).

449

450 Contrary to our prediction, targets of lineage-specific miRNAs were not significantly enriched  
451 for genes under selection in any species. We assessed overlaps between genes undergoing  
452 positive directional selection in *A. mellifera* (Harpur et al. 2014), *B. impatiens* (Harpur et al.  
453 2017), *M. genalis* (Kapheim et al., unpublished), and *N. melanderi* (Kapheim et al. 2019) and the  
454 predicted targets of lineage-specific miRNAs in each of these species. There was no significant  
455 enrichment for predicted targets of lineage-specific miRNAs with genes under positive  
456 directional selection in any species (Table S4). In fact, genes undergoing current selection in the  
457 halictid bees were significantly depleted for targets of lineage-specific miRNAs (*M. genalis* – RF

458 = 0.2,  $p = 4.28e^{-10}$ ; *N. melanderi* – RF = 0.3,  $p = 5.59e^{-4}$ ). We also assessed overlaps with genes  
 459 previously found to be under selection in social species, compared to solitary species (Woodard  
 460 et al. 2011; Kapheim et al. 2015), but found only marginally significant overlap (Kapheim et al.  
 461 2015) or depletion (Woodard et al. 2011) with predicted targets of lineage-specific genes in one  
 462 species (*M. genalis* – RF = 1.9,  $p = 0.053$ ; RF = 0,  $p = 0.05$ ; Table S4).  
 463

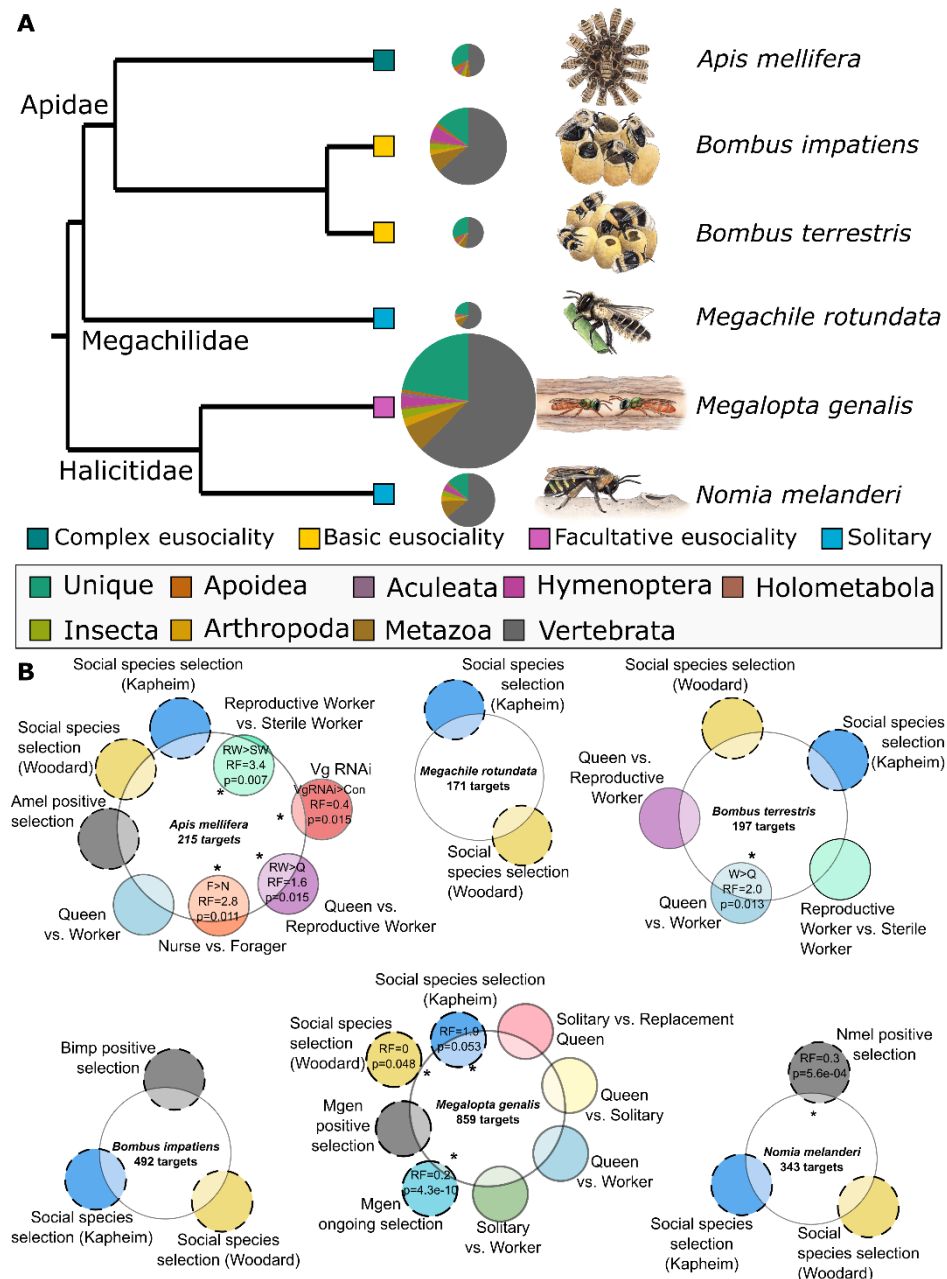

465 **Fig. 2.** Predicted targets of lineage-specific miRNAs in relationship to social behavior. (A)  
466 Genes predicted to be targeted by lineage-specific miRNAs are more likely to be unique to each  
467 species than predicted by chance. Pie chart size is scaled to number of predicted target genes.  
468 Color slices indicate orthogroup age for each predicted gene. (B) Genes that are both predicted  
469 targets of lineage-specific miRNAs and genes with differential expression in a social context  
470 (solid outlines) or genes under selection (dashed outlines) are represented by overlapping circles  
471 for each study and species. Numbers of lineage-specific miRNA targets are given for each  
472 species. Colors indicate different studies. Overlaps not significantly different from random  
473 (representation factor, RF=1) are unlabeled, while significant over- or under-enrichments are  
474 marked with asterisks with RF and p-value as indicated.  
475

## 476 **DISCUSSION**

477 Eusociality is a major evolutionary innovation that requires regulatory changes in a wide range  
478 of molecular pathways (Robinson and Ben-Shahar 2002; Bloch and Grozinger 2011; Sumner et  
479 al. 2018). We tested the hypothesis that miRNAs play a role in the evolution of eusociality via  
480 their regulatory effects on gene networks. Our results provide several lines of support for this  
481 hypothesis.

482

483 First, miRNAs that have been previously implicated in social behavior (i.e., miR-276, miR-13b)  
484 do not show significant differences in copy number or diversification patterns consistent with  
485 social evolution, but the predicted targets of these miRNAs are largely disparate across species.  
486 This is consistent with what has been shown in vertebrates, flies, and nematodes, in which  
487 miRNAs are highly conserved at the sequence level, but miRNA-target relationships are highly  
488 divergent across clades (Chen and Rajewsky 2006; Chen and Rajewsky 2007). In our analysis,  
489 there were similarities in the broad functional categories of predicted targets across closely  
490 related species, and these categories were largely consistent with gene networks expected to play  
491 a role in social evolution (e.g., hormone and signal transduction pathways). Future research  
492 experimentally evaluating the function of these miRNAs in other social species will be necessary

493 to understand the degree to which miRNA function has diversified as a function of social  
494 evolution.  
495  
496 Second, we identified a single miRNA (miR-305) that was expressed exclusively in the brains of  
497 the social bees in our study. The presence of this miRNA in the solitary bee genomes suggests  
498 that an evolutionary shift in expression pattern has accompanied at least two independent origins  
499 of eusociality in bees. This miRNA coordinates Insulin and Notch signaling in *D. melanogaster*,  
500 and both of these pathways are important regulators of social dynamics in insects (Wheeler et al.  
501 2006; Ament et al. 2008; de Azevedo and Hartfelder 2008; Nilsen et al. 2011; Wang et al. 2013;  
502 Hartfelder et al. 2015; Duncan et al. 2016; Chandra et al. 2018; Hartfelder et al. 2018). Some of  
503 the predicted targets of miR-305 in bees (e.g., *oxysterol*, *synaptobrevin*) interact with Insulin and  
504 Notch pathways in *D. melanogaster* (Stewart et al. 2001; Obniski et al. 2018). This miRNA was  
505 also found to be upregulated in worker-destined honey bee larvae, compared to queen-destined  
506 larvae, and may thus play a role in caste differentiation (Shi et al. 2015). Interestingly, miR-305  
507 also promotes aging in *D. melanogaster* (Ueda et al. 2018). Extreme differences in lifespan are  
508 one of the defining characteristics of social insect castes, whereby queens of some ant and bee  
509 species live orders of magnitude longer than workers (Wilson 1971). The mechanisms  
510 underlying these differences are a topic of interest, and a role for a miRNA that modulates  
511 insulin signaling is consistent with current understanding of this phenomenon (Corona et al.  
512 2007; Münch 2008; Remolina and Hughes 2008). Additional investigation is necessary to  
513 determine how this miRNA may influence social behavior across species.  
514

515 We focused additional attention on miRNAs for which no mature miRNAs with seed matches  
516 were detected in any other species, because these have the potential to influence the lineage-  
517 specific patterns of gene regulatory changes previously shown to influence social evolution  
518 (Simola et al. 2013; Kapheim et al. 2015). We hypothesized that if novel miRNAs are inserted  
519 into existing gene networks that become co-opted for social evolution, they should target genes  
520 that are highly conserved across species. Instead, we find that the targets of lineage-specific  
521 miRNAs are enriched for lineage-specific genes, while genes belonging to ancient orthogroups  
522 were not more likely to be targets than expected by chance. This could suggest that novel  
523 miRNAs co-evolve with novel genes, as has been shown for the evolution of cognitive function  
524 in humans (Barbash et al. 2014). Previous work in honey bees has shown that taxonomically-  
525 restricted (i.e., younger) genes play an important role in social evolution. Expression of  
526 taxonomically-restricted genes is significantly biased toward glands with specialized functions  
527 for life in a social colony (e.g., the hypopharyngeal gland and the sting gland) (Jasper et al.  
528 2015), and toward genes that are upregulated in workers (Johnson and Tsutsui 2011). Thus, it is  
529 reasonable to expect that new miRNAs targeting new genes could have important social  
530 functions in honey bees.

531

532 Alternatively, it is possible that new miRNAs that target lineage-specific genes are transient and  
533 more likely to be purged by natural selection because they are less likely to integrate into  
534 existing gene networks (Chen and Rajewsky 2007; França et al. 2016; França et al. 2017).  
535 Emergent miRNAs are expected to initially have limited expression to mitigate potential  
536 deleterious effects on the protein-coding genes that they target. Thus, lineage-specific miRNAs  
537 with low levels of expression may be in the process of being purged and may not have



538 accumulated gene targets with important functions (Chen and Rajewsky 2007; Berezikov 2011).  
539 Evidence for this model comes from primates (Berezikov et al. 2006) and flies (Lu et al. 2008;  
540 Tang et al. 2010). Likewise, we find that lineage-specific miRNAs are expressed at significantly  
541 lower levels than those with at least one homolog in another species. A purging process like this  
542 could explain why there are large differences in the numbers of miRNAs detected in even closely  
543 related species (e.g. the two *Bombus* species). It is also possible that some of this variation comes  
544 from sequencing stochasticity. Functional analysis of lineage-specific genes in additional tissues  
545 and life stages will help to resolve their role in social evolution.

546

547 We find support for the prediction that lineage-specific miRNAs should target genes with social  
548 function in the Apidae (i.e., honey bees and bumble bees), but not the Halictidae (*M. genalis*).  
549 There are several potential explanations for this pattern. One explanation is technical. We define  
550 genes with social functions as those that are differentially expressed among castes. The genetic  
551 basis of social behavior has been much better studied in honey bees than in any other species,  
552 and the set of genes known to function in sociality is thus richer for apids than for halictids.  
553 Further, not all genes that function in social behavior are expected to be differentially expressed  
554 in the brains of different castes, and our analysis is thus likely to exclude some important genes.  
555 Nonetheless, our results reflect differences in the degree of social complexity, and thus caste-  
556 biased gene expression patterns, between apid and halictid bees. Unlike for honey bees and  
557 bumble bees, which cannot live outside of social colonies, eusociality is facultative in *M. genalis*.  
558 As such, caste traits are not fixed during development, and females who once served as non-  
559 reproductive workers can transform into reproductive queens if given the opportunity (Smith et  
560 al. 2009; Kapheim et al. 2012). This flexibility is reflected in the magnitude of differences in

561 brain gene expression patterns between queen and worker honey bees (thousands of genes;  
562 Grozinger et al. 2007) and *M. genalis* (dozens of genes; Jones et al. 2017). Previous research  
563 suggests that miRNAs increase their functional influence over evolutionary time (Berezikov et  
564 al. 2006; Chen and Rajewsky 2007; Lu et al. 2008; Roux et al. 2012; França et al. 2016; Patel  
565 and Capra 2017). Thus, emergent miRNAs are more likely to target genes with social function  
566 due to chance alone in species with increased social complexity and a larger set of caste-biased  
567 genes. Consistent with this explanation, regulatory relationships between miRNAs and genes  
568 with caste-biased expression were not found among two other social insect species with reduced  
569 social complexity (Patalano et al. 2015).

570

571 An additional explanation for these differences in the function of lineage-specific miRNAs  
572 between bee families concerns the role of miRNAs in gene regulatory networks. One of these  
573 roles is to stabilize regulatory relationships in the face of environmental variation, thus  
574 canalizing phenotypes during development (Hornstein and Shomron 2006; Peterson et al. 2009;  
575 Wu et al. 2009; Berezikov 2011). This is likely to be more important in species with obligate  
576 eusociality, such as the honey bees and bumble bees for which caste determination is canalized,  
577 than in species like *M. genalis*, where plasticity of phenotypes related to eusociality are  
578 maintained in totipotent females.

579

580 Contrary to their effects on genes with socially-differentiated expression patterns, lineage-  
581 specific miRNAs showed no evidence for preferential targeting of genes under positive selection  
582 – either within individual species or across social species. In contrast, we find these emergent  
583 miRNAs are less likely than expected by chance to target genes under positive selection in the

584 two halictid bees. A potential explanation for this pattern is that genes that are adaptively  
585 targeted by miRNAs tend to be under purifying selection, because this maintains the regulatory  
586 relationship between the miRNA and target, thus preventing gene mis-expression (Chen and  
587 Rajewsky 2006; Saunders et al. 2007; Sarasin-Filipowicz et al. 2009; Franchini et al. 2016).  
588 However, this selective constraint is likely to be most significant in the 3' UTR region, where  
589 miRNA binding sites are located.

590  
591 A more likely explanation involves the hypothesized pattern of miRNA origins and assimilation,  
592 as proposed by Chen and Rajewsky (2007). This model suggests that newly emerged miRNAs  
593 are likely to have many targets throughout the genome due to chance. Most of these initial  
594 miRNA-target regulatory relationships are likely to have slightly deleterious effects, and would  
595 likely be purged through purifying selection very quickly. These deleterious effects could be  
596 particularly strong for target genes undergoing positive selection, because changes in the  
597 functional regulation of these genes are likely to have significant fitness consequences. Also,  
598 genes under positive selection are undergoing rapid evolution, and thus may be more likely to  
599 “escape” control by errant miRNAs. Indeed, it is easier for mRNAs to lose miRNA target  
600 binding sites, which typically require exact sequence matches, than to gain them (Chen and  
601 Rajewsky 2007). Thus, emergent miRNAs may not be expected to target adaptively or fast  
602 evolving genes, regardless of their role in social evolution.

603  
604 The evolution of eusociality depends on many different tissues and physiological processes, and  
605 brain-specific expression patterns are not likely to be representative of the complete role of  
606 individual miRNAs in social behavior. Some or all of the predicted miRNA-gene relationships

607 we identified may have evolved to support traits in other cell types or processes unrelated to  
608 sociality. Additional sequencing of miRNA and mRNA across tissue-types and stages of  
609 development in social and solitary species is necessary to provide a comprehensive assessment  
610 of the role of emergent miRNAs in social traits. Nonetheless, the brain is a major focus of  
611 research in social evolution because it is the primary source of behavioral and neuroendocrine  
612 output. Our results thus provide a good starting place for evaluating the role of miRNAs in  
613 lineage-specific processes in the evolution of social behavior.

614

615 Our analyses reveal important differences in patterns of miRNA evolution between bees and  
616 other species. For example, expansion in miRNA repertoire is associated with the evolution of  
617 animal complexity in a wide range of species (Heimberg et al. 2008; Christodoulou et al. 2010;  
618 Berezikov 2011). The evolution of eusociality from a solitary ancestor is associated with  
619 increases in phenotypic complexity, and considered to be one of the major transitions in  
620 evolution (Maynard Smith and Szathmary 1995). We therefore hypothesized that evolutionary  
621 increases in social complexity would be associated with expansions in the number of miRNAs  
622 found within bee genomes. To the contrary, we find that most bees have a single copy of  
623 previously identified miRNAs in their genomes. This is consistent with results of comparative  
624 genome scans across several ant species (Simola et al. 2013). A recent study of miRNA diversity  
625 in insects found that morphological innovations such as holometabolous development was  
626 accompanied by the acquisition of only three miRNA families (Ylla et al. 2016). This suggests  
627 that insect evolution is not as reliant on major expansions of miRNA families as other taxonomic  
628 groups.

629

630 Additionally, our characterization of lineage-specific miRNAs expressed in the brain of each  
631 species reveals that genome structure is not as influential in regulating bee miRNA evolution as  
632 has been shown for human miRNAs. Novel human miRNAs tend to arise in ancient genes that  
633 have multiple functions and broad expression patterns (França et al. 2016). It is hypothesized that  
634 this increases the expression repertoire of emergent miRNAs, and thus facilitates persistence in  
635 the population (França et al. 2016; França et al. 2017). Only in one species (*N. melanderi*) were  
636 lineage-specific miRNAs more likely to be localized intragenically than previously identified  
637 miRNAs, while lineage-specific miRNAs did not differ from previously identified miRNAs in  
638 their genomic locations in the other five species. This suggests that emergence patterns for new  
639 miRNAs are unique to each lineage in bees. We also do not find a consistent pattern between  
640 young, emerging miRNAs and host gene age. There was no significant difference in the age of  
641 genes that serve as hosts for established versus lineage-specific miRNAs across all species. This  
642 is despite the fact that a similar proportion of bee miRNAs are located within introns (31-43%;  
643 Table 1), as compared to in vertebrates (36-65%) (Meunier et al. 2013). However, the fact that  
644 73-88% of miRNAs that are localized to genes are encoded on the sense strand suggests that they  
645 would benefit from host transcription, as is observed in vertebrates (Meunier et al. 2013).  
646 Additional research with insects will be necessary to identify general patterns of miRNA  
647 evolution in relationship to genome structure.

648

649 Our study identifies patterns of miRNA evolution in a set of closely related bees that vary in  
650 social organization. Our results highlight important similarities and differences in the emergence  
651 patterns and functions of mammalian and insect genomes. We also find evidence that emergent  
652 miRNAs function in lineage-specific patterns of social evolution, perhaps through co-evolution

653 of novel miRNAs and species-specific targets. We do not see an overall increase in the number  
654 of miRNAs in the genome or expressed in the brains of species with more complex eusociality.  
655 However, we do find evidence that the role of miRNAs in social evolution may strengthen with  
656 increasing social complexity, perhaps due to an increased need for canalization of caste  
657 determination or due to chance, as a function of an increased number of genes with caste-biased  
658 expression. Empirical tests of miRNA function across additional species with variable social  
659 organization will further improve our understanding of how gene regulatory evolution gives rise  
660 to eusociality.

661

## 662 REFERENCES

- 663 Alaux C, Le Conte Y, Adams HA, Rodriguez-Zas S, Grozinger CM, Sinha S, Robinson GE.  
664 2009. Regulation of brain gene expression in honey bees by brood pheromone. *Genes, Brain*  
665 *Behav.* 8:309–319.
- 666 Ament S A, Corona M, Pollock HS, Robinson GE. 2008. Insulin signaling is involved in the  
667 regulation of worker division of labor in honey bee colonies. *Proc. Natl. Acad. Sci. U. S. A.*  
668 105:4226–4231.
- 669 Asgari S. 2013. MicroRNA functions in insects. *Insect Biochem. Mol. Biol.* 43:388–397.
- 670 Ashby R, Forêt S, Searle I, Maleszka R. 2016. MicroRNAs in Honey Bee Caste Determination.  
671 *Sci. Rep.* 6:1–5.
- 672 de Azevedo SV, Hartfelder K. 2008. The insulin signaling pathway in honey bee (*Apis mellifera*)  
673 caste development — differential expression of insulin-like peptides and insulin receptors in  
674 queen and worker larvae. *J. Insect Physiol.* 54:1064–1071.
- 675 Barbash S, Shifman S, Soreq H. 2014. Global coevolution of human microRNAs and their target

- 676 genes. *Mol. Biol. Evol.* 31:1237–1247.
- 677 Bartel DP. 2018. Metazoan MicroRNAs. *Cell* 173:20–51.
- 678 Behura SK, Whitfield CW. 2010. Correlated expression patterns of microRNA genes with age-  
679 dependent behavioural changes in honeybee. *Insect Mol. Biol.* 19:431–439.
- 680 Berezikov E. 2011. Evolution of microRNA diversity and regulation in animals. *Nat. Rev.*  
681 *Genet.* 12:846–860.
- 682 Berezikov E, Thuemmler F, van Laake LW, Kondova I, Bontrop R, Cuppen E, Plasterk RHA.  
683 2006. Diversity of microRNAs in human and chimpanzee brain. *Nat. Genet.* 38:1375–  
684 1377.
- 685 Bloch G, Grozinger CM. 2011. Social molecular pathways and the evolution of bee societies.  
686 *Philos. Trans. R. Soc. B Biol. Sci.* 366:2155–2170.
- 687 Bonasio R, Zhang G, Ye C, Mutti NS, Fang X, Qin N, Donahue G, Yang P, Li Q, Li C, et al.  
688 2010. Genomic comparison of the ants *Camponotus floridanus* and *Harpegnathos saltator*.  
689 *Science* 329:1068–1071.
- 690 Branstetter MG, Danforth BN, Pitts JP, Faircloth BC, Ward PS, Buffington ML, Gates MW,  
691 Kula RR, Brady SG. 2017. Phylogenomic insights into the evolution of stinging wasps and  
692 the origins of ants and bees. *Curr. Biol.* 27:1019–1025.
- 693 Cardinal S, Danforth BN. 2011. The antiquity and evolutionary history of social behavior in  
694 bees. *PLoS One* 6:e21086.
- 695 Chandra V, Fetter-Pruneda I, Oxley PR, Ritger AL, McKenzie SK, Libbrecht R, Kronauer DJC.  
696 2018. Social regulation of insulin signaling and the evolution of eusociality in ants. *Science*  
697 361:398–402.
- 698 Chen K, Rajewsky N. 2006. Deep conservation of microRNA-target relationships and 3'UTR

- 699 motifs in vertebrates, flies, and nematodes. In: Cold Spring Harbor Symposia on  
700 Quantitative Biology. Vol. 71. p. 149–156.
- 701 Chen K, Rajewsky Nikolaus. 2006. Natural selection on human microRNA binding sites inferred  
702 from SNP data. *Nat. Genet.* 38:1452–1456.
- 703 Chen K, Rajewsky N. 2007. The evolution of gene regulation by transcription factors and  
704 microRNAs. *Nat. Rev. Genet.* 8:93–103.
- 705 Christodoulou F, Raible F, Tomer R, Simakov O, Trachana K, Klaus S, Snyman H, Hannon GJ,  
706 Bork P, Arendt D. 2010. Ancient animal microRNAs and the evolution of tissue identity.  
707 *Nature* 463:1084–1088.
- 708 Collins DH, Mohorianu I, Beckers M, Moulton V, Dalmay T, Bourke AFG. 2017. MicroRNAs  
709 associated with caste determination and differentiation in a primitively eusocial insect. *Sci.*  
710 *Rep.* 7:1–9.
- 711 Corona M, Velarde RA, Remolina S, Moran-Lauter A, Wang Y, Hughes KA, Robinson GE.  
712 2007. Vitellogenin, juvenile hormone, insulin signaling, and queen honey bee longevity.  
713 *Proc. Natl. Acad. Sci. U. S. A.* 104:7128–7133.
- 714 Cui X, Lu Z, Wang S, Jing-Yan Wang J, Gao X. 2016. CMsearch: simultaneous exploration of  
715 protein sequence space and structure space improves not only protein homology detection  
716 but also protein structure prediction. *Bioinformatics* 32:i332–i340.
- 717 D. Münch GVAFW. 2008. Ageing in a eusocial insect: molecular and physiological  
718 characteristics of life span plasticity in the honey bee. *Funct. Ecol.* 22:407–421.
- 719 Duncan EJ, Hyink O, Dearden PK. 2016. Notch signalling mediates reproductive constraint in  
720 the adult worker honeybee. *Nat. Commun.* 7:1–10.
- 721 Elsik CG, Worley KC, Bennett AK, Beye M, Camara F, Childers CP, de Graaf DC, Debyser G,



- 722 Deng J, Devreese B, et al. 2014. Finding the missing honey bee genes: Lessons learned  
723 from a genome upgrade. *BMC Genomics* 15:1–29.
- 724 Enright AJ, John B, Gaul U, Tuschl T, Sander C. 2004. MicroRNA targets in *Drosophila*.  
725 *Genome Biol.* 5:R1.
- 726 Filipowicz W, Bhattacharyya SN, Sonenberg N. 2008. Mechanisms of post-transcriptional  
727 regulation by microRNAs: are the answers in sight? *Nat. Rev. Genet.* 9:102-114.
- 728 França GS, Hinske LC, Galante PAFF, Vibranovski MD. 2017. Unveiling the impact of the  
729 genomic architecture on the evolution of vertebrate microRNAs. *Front. Genet.* 8:1–8.
- 730 França GS, Vibranovski MD, Galante PAF. 2016. Host gene constraints and genomic context  
731 impact the expression and evolution of human microRNAs. *Nat. Commun.* 7:11438.
- 732 Franchini P, Xiong P, Fruciano C, Meyer A. 2016. The role of microRNAs in the repeated  
733 parallel diversification of lineages of midas cichlid fish from Nicaragua. *Genome Biol.*  
734 *Evol.* 8:1543–1555.
- 735 Friedländer MR, MacKowiak SD, Li N, Chen W, Rajewsky N. 2012. MiRDeep2 accurately  
736 identifies known and hundreds of novel microRNA genes in seven animal clades. *Nucleic*  
737 *Acids Res.* 40:37–52.
- 738 Friedman RC, Farh KK-H, Burge CB, Bartel DP. 2009. Most mammalian mRNAs are conserved  
739 targets of microRNAs. *Genome Res.* 19:92–105.
- 740 Gentleman R, Falcon S. 2013. Package “GOstats.” 2.26.0.
- 741 Greenberg JK, Xia J, Zhou X, Thatcher SR, Gu X, Ament SA, Newman TC, Green PJ, Zhang W,  
742 Robinson GE, et al. 2012. Behavioral plasticity in honey bees is associated with differences  
743 in brain microRNA transcriptome. *Genes, Brain Behav.* 11:660–670.
- 744 Grimson A, Srivastava M, Fahey B, Woodcroft BJ, Chiang HR, King N, Degan BM, Rokhsar

- 745 DS, Bartel DP. 2008. Early origins and evolution of microRNAs and Piwi-interacting RNAs  
746 in animals. *Nature* 455:1193–1197.
- 747 Grozinger CM, Fan Y, Hoover SER, Winston ML. 2007. Genome-wide analysis reveals  
748 differences in brain gene expression patterns associated with caste and reproductive status  
749 in honey bees (*Apis mellifera*). *Mol. Ecol.* 16:4837–4848.
- 750 Grün D, Wang Y-L, Langenberger D, Gunsalus KC, Rajewsky N. 2005. microRNA target  
751 predictions across seven *Drosophila* species and comparison to mammalian targets. *PLoS*  
752 *Comput. Biol.* 1:e13.
- 753 Harpur BA, Dey A, Albert JR, Patel S, Hines HM, Hasselmann M, Packer L, Zayed A. 2017.  
754 Queens and workers contribute differently to adaptive evolution in bumble bees and honey  
755 bees. *Genome Biol. Evol.* 9:2395–2402.
- 756 Harpur BA, Kent CF, Molodtsova D, Lebon JM, Alqarni AS, Owayss AA, Zayed A. 2014.  
757 Population genomics of the honey bee reveals strong signatures of positive selection on  
758 worker traits. *Proc Natl Acad Sci U S A* 111:2614–2619.
- 759 Harrison MC, Hammond RL, Mallon EB. 2015. Reproductive workers show queenlike gene  
760 expression in an intermediately eusocial insect, the buff-tailed bumble bee *Bombus*  
761 *terrestris*. *Mol. Ecol.* 24:3043–3063.
- 762 Hartfelder K, Guidugli-Lazzarini KR, Cervoni MS, Santos DE, Humann FC. 2015. Old threads  
763 make new tapestry—rewiring of signalling pathways underlies caste phenotypic plasticity in  
764 the honey bee, *Apis mellifera* L. 1st ed. Elsevier Ltd.
- 765 Hartfelder K, Tiberio GJ, Lago DC, Dallacqua RP, Bitondi MMG. 2018. The ovary and its  
766 genes—developmental processes underlying the establishment and function of a highly  
767 divergent reproductive system in the female castes of the honey bee, *Apis mellifera*.

- 768 Apidologie 49:49–70.
- 769 Heimberg AM, Sempere LF, Moy VN, Donoghue PCJ, Peterson KJ. 2008. MicroRNAs and the  
770 advent of vertebrate morphological complexity. Proc. Natl. Acad. Sci. U. S. A. 105:2946–  
771 2950.
- 772 Hornstein E, Shomron N. 2006. Canalization of development by microRNAs. Nat. Genet.  
773 38:S20–S24.
- 774 Jasper WC, Linksvayer TA, Atallah J, Friedman D, Chiu JC, Johnson BR. 2015. Large-scale  
775 coding sequence change underlies the evolution of postdevelopmental novelty in honey  
776 bees. Mol. Biol. Evol. 32:334–346.
- 777 Johnson B, Tsutsui N. 2011. Taxonomically restricted genes are associated with the evolution of  
778 sociality in the honey bee. BMC Genomics 12:164.
- 779 Johnson BR, Linksvayer TA. 2010. Deconstructing the superorganism: social physiology,  
780 groundplans, and sociogenomics. Q. Rev. Biol. 85:57–79.
- 781 Jones BM, Kingwell CJ, Wcislo WT, Robinson GE. 2017. Caste-biased gene expression in a  
782 facultatively eusocial bee suggests a role for genetic accommodation in the evolution of  
783 eusociality. Proc. R. Soc. B Biol. Sci. 284.
- 784 Kapheim KM, Jones BM, Pan H, Harpur BA, Kent CF, Zayed A, Ioannidis P, Waterhouse RM,  
785 Kingwell C, Stolle E, et al. Developmental plasticity shapes the genomic signatures of  
786 eusociality. Unpublished
- 787 Kapheim KM, Pan H, Li C, Blatti C, Harpur BA, Ioannidis P, Jones BM, Kent CF, Ruzzante L,  
788 Sloofman L, et al. 2019. Draft genome assembly and population genetics of an agricultural  
789 pollinator, the solitary alkali bee (Halictidae: *Nomia melanderi*). G3. 9:625–634.
- 790 Kapheim KM, Pan H, Li C, Salzberg SL, Puiu D, Magoc T, Robertson HM, Hudson ME, Venkat

- 791 A, Fischman BJ, et al. 2015. Genomic signatures of evolutionary transitions from solitary to  
792 group living. *Science* 348:24–32.
- 793 Kapheim KM, Smith AR, Ihle KE, Amdam G V, Nonacs P, Wcislo WT. 2012. Physiological  
794 variation as a mechanism for developmental caste-biasing in a facultatively eusocial sweat  
795 bee. *Proc. R. Soc. B Biol. Sci.* 279:1437–1446.
- 796 Kocher SD, Li C, Yang W, Tan H, Yi S V, Yang X, Hoekstra HE, Zhang G, Pierce NE, Yu DW.  
797 2013. The draft genome of a socially polymorphic halictid bee, *Lasioglossum albipes*.  
798 *Genome Biol.* 14:R142.
- 799 Krüger J, Rehmsmeier M. 2006. RNAhybrid: microRNA target prediction easy, fast and flexible.  
800 *Nucleic Acids Res.* 34:W451-4.
- 801 Liu F, Peng W, Li Z, Li W, Li L, Pan J, Zhang S, Miao Y, Chen S, Su S. 2012. Next-generation  
802 small RNA sequencing for microRNAs profiling in *Apis mellifera*: Comparison between  
803 nurses and foragers. *Insect Mol. Biol.* 21:297–303.
- 804 Lu J, Shen Y, Wu Q, Kumar S, He B, Shi S, Carthew RW, Wang SM, Wu C-I. 2008. The birth  
805 and death of microRNA genes in *Drosophila*. *Nat. Genet.* 40:351–355.
- 806 MacEdo LMF, Nunes FMF, Freitas FCP, Pires C V., Tanaka ED, Martins JR, Piulachs MD,  
807 Cristino AS, Pinheiro DG, Simões ZLP. 2016. MicroRNA signatures characterizing caste-  
808 independent ovarian activity in queen and worker honeybees (*Apis mellifera* L.). *Insect*  
809 *Mol. Biol.* 25:216–226.
- 810 Marshall H, Lonsdale ZN, Mallon EB. 2019. Methylation and gene expression differences  
811 between reproductive castes of bumblebee workers. bioRxiv :517698. Available from:  
812 <https://www.biorxiv.org/content/early/2019/01/11/517698>
- 813 Maynard Smith J, Szathmáry E. 1995. *The major transitions in evolution*. Oxford, England:

- 814 Oxford University Press
- 815 Meunier J, Lemoine F, Soumillon M, Liechti A, Weier M, Guschanski K, Hu H, Khaitovich P,  
816 Kaessmann H. 2013. Birth and expression evolution of mammalian microRNA genes.  
817 *Genome Res.* 23:34–45.
- 818 Nilsen K-A, Ihle KE, Frederick K, Fondrk MK, Smedal B, Hartfelder K, Amdam G V. 2011.  
819 Insulin-like peptide genes in honey bee fat body respond differently to manipulation of  
820 social behavioral physiology. *J. Exp. Biol.* 214:1488–1497.
- 821 Nunes FM, Ihle KE, Mutti NS, Simoes ZL, Amdam G V. 2013. The gene vitellogenin affects  
822 microRNA regulation in honey bee (*Apis mellifera*) fat body and brain. *J Exp Biol*  
823 216:3724–3732.
- 824 Obniski R, Sieber M, Spradling AC. 2018. Dietary lipids modulate Notch signaling and  
825 influence adult intestinal development and metabolism in *Drosophila*. *Dev. Cell* 47:98-  
826 111.e5.
- 827 Paradis E, Claude J, Strimmer K. 2004. APE: Analyses of phylogenetics and evolution in R  
828 language. *Bioinformatics* 20:289–290.
- 829 Patalano S, Vlasova A, Wyatt C, Ewels P, Camara F, Ferreira PG, Asher CL, Jurkowski TP,  
830 Segonds-Pichon A, Bachman M, et al. 2015. Molecular signatures of plastic phenotypes in  
831 two eusocial insect species with simple societies. *Proc. Natl. Acad. Sci.* 112:13970–13975.
- 832 Patel VD, Capra JA. 2017. Ancient human miRNAs are more likely to have broad functions and  
833 disease associations than young miRNAs. *BMC Genomics* 18:672.
- 834 Peterson KJ, Dietrich MR, McPeck MA. 2009. MicroRNAs and metazoan macroevolution:  
835 insights into canalization, complexity, and the Cambrian explosion. *BioEssays* 31:736–747.
- 836 Quah S, Hui JHL, Holland PWH. 2015. A burst of miRNA innovation in the early evolution of

- 837 butterflies and moths. *Mol. Biol. Evol.* 32:1161–1174.
- 838 Quinlan AR, Hall IM. 2010. BEDTools: a flexible suite of utilities for comparing genomic  
839 features. *Bioinformatics* 26:841–842.
- 840 R Core Team 2016. R: A language and environment for statistical computing. Available from:  
841 <https://www.r-project.org/>
- 842 Remolina SC, Hughes KA. 2008. Evolution and mechanisms of long life and high fertility in  
843 queen honey bees. *Age*. 30:177–185.
- 844 Robinson GE, Ben-Shahar Y. 2002. Social behavior and comparative genomics: new genes or  
845 new gene regulation? *Genes, Brain Behav.* 1:197–203.
- 846 Robinson MD, McCarthy DJ, Smyth GK. 2010. edgeR: a Bioconductor package for differential  
847 expression analysis of digital gene expression data. *Bioinformatics* 26.
- 848 Roux J, González-Porta M, Robinson-Rechavi M. 2012. Comparative analysis of human and  
849 mouse expression data illuminates tissue-specific evolutionary patterns of miRNAs. *Nucleic  
850 Acids Res.* 40:5890–5900.
- 851 Sadd BM, Barribeau SM, Bloch G, de Graaf DC, Dearden P, Elsik CG, Gadau J,  
852 Grimmelikhuijzen CJ, Hasselmann M, Lozier JD, et al. 2015. The genomes of two key  
853 bumblebee species with primitive eusocial organization. *Genome Biol.* 16:76. A
- 854 Sarasin-Filipowicz M, Krol J, Markiewicz I, Heim MH, Filipowicz W. 2009. Decreased levels of  
855 microRNA miR-122 in individuals with hepatitis C responding poorly to interferon therapy.  
856 *Nat. Med.* 15:31–33.
- 857 Saunders MA, Liang H, Li W-H. 2007. Human polymorphism at microRNAs and microRNA  
858 target sites. *Proc. Natl. Acad. Sci. U. S. A.* 104:3300–3305.
- 859 Shi YY, Zheng HJ, Pan QZ, Wang ZL, Zeng ZJ. 2015. Differentially expressed microRNAs

- 860 between queen and worker larvae of the honey bee (*Apis mellifera*). *Apidologie* 46:35–45.
- 861 Sievers F, Wilm A, Dineen D, Gibson TJ, Karplus K, Li W, Lopez R, McWilliam H, Remmert  
862 M, Söding J, et al. 2011. Fast, scalable generation of high-quality protein multiple sequence  
863 alignments using Clustal Omega. *Mol. Syst. Biol.* 7:539.
- 864 Simola DF, Wissler L, Donahue G, Waterhouse RM, Helmkampf M, Roux J, Nygaard S, Glastad  
865 KM, Hagen DE, Viljakainen L, et al. 2013. Social insect genomes exhibit dramatic  
866 evolution in gene composition and regulation while preserving regulatory features linked to  
867 sociality. *Genome Res.* 23:1235–1247.
- 868 Smit AFA, Hubley R, Green P: RepeatMasker. Available from: <http://www.repeatmasker.org/>
- 869 Smith AR, Kapheim KM, O'Donnell S, Wcislo WT. 2009. Social competition but not subfertility  
870 leads to a division of labour in the facultatively social sweat bee *Megalopta genalis*  
871 (Hymenoptera: Halictidae). *Anim. Behav.* 78:1043–1050.
- 872 Søvik E, Bloch G, Ben-Shahar Y, Søvik E, Bloch G, Ben-Shahar Y, Søvik E, Bloch G, Ben-  
873 Shahar Y. 2015. Function and evolution of microRNAs in eusocial Hymenoptera. *Front.*  
874 *Genet.* 6:1–11.
- 875 Stewart BA, Mohtashami M, Zhou L, Trimble WS, Boulianne GL. 2001. SNARE-dependent  
876 signaling at the *Drosophila* wing margin. *Dev. Biol.* 234:13–23.
- 877 Sumner S, Bell E, Taylor D. 2018. A molecular concept of caste in insect societies. *Curr. Opin.*  
878 *Insect Sci.* 25:42–50. Available from: <http://dx.doi.org/10.1016/j.cois.2017.11.010>
- 879 Tang T, Kumar S, Shen Y, Lu J, Wu M-L, Shi S, Li W-H, Wu C-I. 2010. Adverse interactions  
880 between micro-RNAs and target genes from different species. *Proc. Natl. Acad. Sci. U. S.*  
881 *A.* 107:12935–12940.
- 882 Toth AL, Robinson GE. 2007. Evo-devo and the evolution of social behavior. *Trends Genet.*

- 883 23:334–341.
- 884 Ueda M, Sato T, Ohkawa Y, Inoue YH. 2018. Identification of *miR-305*, a microRNA that  
885 promotes aging, and its target mRNAs in *Drosophila*. *Genes to Cells* 23:80–93.
- 886 Wang Y, Azevedo S V, Hartfelder K, Amdam G V. 2013. Insulin-like peptides (AmILP1 and  
887 AmILP2) differentially affect female caste development in the honey bee (*Apis mellifera*  
888 L.). *J Exp Biol* 216:4347–4357.
- 889 Weaver D, Anzola J, Evans J, Reid J, Reese J, Childs K, Zdobnov E, Samanta M, Miller J, Elsik  
890 C. 2007. Computational and transcriptional evidence for microRNAs in the honey bee  
891 genome. *Genome Biol.* 8:R97.
- 892 Wheeler BM, Heimberg AM, Moy VN, Sperling EA, Holstein TW, Heber S, Peterson KJ. 2009.  
893 The deep evolution of metazoan microRNAs. *Evol. Dev.* 11:50–68.
- 894 Wheeler DE, Buck N, Evans JD. 2006. Expression of insulin pathway genes during the period of  
895 caste determination in the honey bee, *Apis mellifera*. *Insect Mol. Biol.* 15:597–602.
- 896 Wheeler MM, Ament SA, Rodriguez-Zas SL, Robinson GE. 2013. Brain gene expression  
897 changes elicited by peripheral *vitellogenin* knockdown in the honey bee. *Insect Mol. Biol.*  
898 22:562–573.
- 899 Whitfield CW, Cziko A- M, Robinson GE. 2003. Gene expression profiles in the brain predict  
900 behavior in individual honey bees. *Science* 302.
- 901 Wilson EO. 1971. *The Insect Societies*. Cambridge, Massachusetts: Harvard University Press
- 902 Woodard SH, Fischman BJ, Venkat A, Hudson ME, Varala K, Cameron SA, Clark AG,  
903 Robinson GE. 2011. Genes involved in convergent evolution of eusociality in bees. *Proc*  
904 *Natl Acad Sci U S A* 108:7472–7477.
- 905 Wu C-I, Shen Y, Tang T. 2009. Evolution under canalization and the dual roles of microRNAs: a



906 hypothesis. *Genome Res.* 19:734–743.

907 Ylla G, Fromm B, Piulachs MD, Belles X. 2016. The microRNA toolkit of insects. *Sci. Rep.*

908 6:1–13.

909 Zdobnov EM, Tegenfeldt F, Kuznetsov D, Waterhouse RM, Simão FA, Ioannidis P, Seppey M,

910 Loetscher A, Kriventseva E V. 2017. OrthoDB v9.1: cataloging evolutionary and functional

911 annotations for animal, fungal, plant, archaeal, bacterial and viral orthologs. *Nucleic Acids*

912 *Res.* 45:D744–D749.

913 Zhu Y, Skogerbø G, Ning Q, Wang Z, Li B, Yang S, Sun H, Li Y. 2012. Evolutionary

914 relationships between miRNA genes and their activity. *BMC Genomics*13:718.

915

## 916 **AUTHOR CONTRIBUTIONS**

917 K.M.K. conceived of the study and designed the experiments. K.M.K., E.S., G.B., and Y.B-S.

918 collected the data. K.M.K., B.M.J., E.S., and R.M.W. analyzed the data. K.M.K. wrote the initial

919 draft of the manuscript. All authors edited and approved the article for publication.

920

## 921 **ACKNOWLEDGMENTS**

922 This study was supported by funds from Utah State University and the Utah Agricultural

923 Experiment Station (Project 1297) and by the US-Israel Binational Science Foundation (BSF

924 2012807) (to G.B.). R.M.W. was supported by Swiss National Science Foundation Grant

925 PP00P3\_170664. Sequencing was performed at the University of Illinois Roy J. Carver

926 Biotechnology Center. We thank the University of Utah High Performance Computing Center

927 for computational time and assistance. Illustrations were created by J. Johnson (LifeSciences

928 Studios). We thank G. Robinson for helpful feedback on an earlier draft of this manuscript.

929
