1                   **Changes in brain microRNAs are associated with social evolution in bees**

2  
3           Karen M. Kapheim<sup>1\*</sup>, Beryl M. Jones<sup>2ϕ</sup>, Eirik Søvik<sup>3</sup>, Eckart Stolle<sup>4</sup>, Robert M. Waterhouse<sup>5</sup>,  
4                                           Guy Bloch<sup>6</sup>, Yehuda Ben-Shahar<sup>7</sup>

5  
6           <sup>1</sup> Department of Biology, Utah State University, Logan, UT 84322, USA

7  
8           <sup>2</sup> Program in Ecology, Evolution, and Conservation Biology, University of Illinois at Urbana-  
9           Champaign, Urbana, IL 61801, USA

10  
11           <sup>3</sup> Department of Science and Mathematics, Volda University College, 6100 Volda, Norway

12  
13           <sup>4</sup> Centre of Molecular Biodiversity Research, Forschungsmuseum Alexander Koenig,  
14           Adenauerallee 160, 53113 Bonn, Germany

15  
16           <sup>5</sup> Department of Ecology and Evolution, University of Lausanne and Swiss Institute of  
17           Bioinformatics, 1015 Lausanne, Switzerland

18  
19           <sup>6</sup> Department of Ecology, Evolution and Behavior, The Alexander Silberman Institute of Life  
20           Sciences, The Hebrew University of Jerusalem, Jerusalem, 91904, Israel

21  
22           <sup>7</sup> Department of Biology, Washington University in St. Louis, St. Louis, MO 63130, USA

23  
24           ϕ Current affiliation: Department of Ecology and Evolutionary Biology, Princeton University,  
25           Princeton, NJ 08544, USA

26  
27           \* Author for Correspondence:

28           Karen M. Kapheim  
29           Biology Department  
30           Utah State University  
31           5305 Old Main Hill  
32           Logan, UT 84322, U.S.A.  
33           [karen.kapheim@usu.edu](mailto:karen.kapheim@usu.edu)  
34           +1-435-797-0685

35  
36

37 **ABSTRACT**

38 Evolutionary transitions to a social lifestyle in insects are associated with lineage-specific  
39 changes in gene expression, but the key nodes that drive these regulatory changes are largely  
40 unknown. We tested the hypothesis that changes in gene regulation associated with social  
41 evolution are facilitated by lineage-specific function of microRNAs (miRNAs). Genome scans  
42 across 12 bee species showed that miRNA copy-number is mostly conserved and not associated  
43 with sociality. However, deep sequencing of small RNAs in six bee species revealed a  
44 substantial proportion (20-35%) of detected miRNAs had lineage-specific expression in the  
45 brain, 24-72% of which did not have homologs in other species. Lineage-specific miRNAs  
46 disproportionately target lineage-specific genes, and have lower expression levels than shared  
47 miRNAs. The predicted targets of lineage-specific miRNAs are enriched for genes related to  
48 social behavior in social species, but they are not enriched for genes under positive selection.  
49 Together, these results suggest that novel miRNAs may contribute to lineage-specific patterns of  
50 social evolution. Our analyses also support the hypothesis that many new miRNAs are purged by  
51 selection due to deleterious effects on mRNA targets, and suggest genome structure is not as  
52 influential in regulating bee miRNA evolution as has been shown for mammalian miRNAs.

53

54 **Keywords:** Gene regulation; small non-coding RNA; microRNA targets; eusociality; lineage-  
55 specific

56

## 57 INTRODUCTION

58 Eusociality has evolved several times in the hymenopteran insects. In its most basic form,  
59 this lifestyle involves reproductive queens living with their worker daughters who forego direct  
60 reproduction to cooperatively defend the nest, care for their siblings, and forage for the colony.  
61 Due to the complex nature of this lifestyle, the evolution of eusociality likely requires  
62 modification of molecular pathways related to development, behavior, neurobiology, physiology,  
63 and morphology [1]. The evolution of eusociality is thus expected to involve both genetic  
64 changes as well as changes in the way the genome responds to the environment [2]. It is  
65 therefore unsurprising that recent studies aimed at identifying the genomic signatures of eusocial  
66 evolution in insects have found that social species share an increased capacity for gene regulation  
67 [3,4]. Evidence for this comes from signatures of rapid evolution of genes involved in  
68 transcription and translation, gene family expansions of transcription factors, and increasing  
69 potential for DNA methylation and transcription factor binding activity in conserved genes.  
70 Interestingly, while these types of regulatory changes are common to independent origins and  
71 elaborations of eusociality, the specific genes and regulatory elements involved are unique to  
72 each lineage [3–5]. This suggests that lineage-specific processes are influential in generating new  
73 patterns of gene regulation that contribute to social behavior.

74  
75 Small, non-coding RNAs such as microRNAs (miRNAs) may be an important source of  
76 regulatory novelty associated with the evolution of phenotypic complexity, including eusociality.  
77 MiRNAs are short (~21-22 nt), noncoding RNAs that regulate protein-coding genes through  
78 post-transcriptional binding to the 3' UTR region of messenger RNA (mRNA) transcripts, in  
79 most cases preventing translation or causing mRNA degradation [6]. Each miRNA can target

80 dozens to hundreds of mRNAs, and may therefore regulate multiple gene networks [6,7]. Like  
81 mRNAs, the majority of miRNAs are generated via Pol II transcription, and are spatially- and  
82 temporally-specific in their expression patterns. Thus, complex changes in gene regulation can  
83 be achieved with relatively minor changes in miRNA expression. This can result in major  
84 phenotypic shifts or fine-tuning of phenotypic optimization [6]. Novel miRNAs can originate in  
85 a variety of genomic features, including exons and introns of protein-coding and non-coding  
86 RNA genes, transposable elements, pseudogenes, or intergenic regions, and thus emerge and  
87 disappear over relatively rapid timescales [8–11]. It is thus not surprising that expansion of the  
88 miRNA repertoire is associated with the evolution of morphological complexity across the tree  
89 of life [9,12–14].

90  
91       There is accumulating evidence for a role of miRNAs in regulating the social lives of  
92 insects. While most miRNAs seem to be conserved in major lineages of insects [15,16],  
93 expression levels vary across individuals performing different social functions, such as between  
94 workers performing different tasks in honey bees [17–19]. MiRNAs may also play a role in caste  
95 determination, as queen- and worker-destined larvae express different sets of miRNAs  
96 throughout development in honey bees [20–22] and bumble bees [23]. Additionally, miRNAs  
97 play a role in regulating some physiological correlates of social behavior in honey bees,  
98 including activation of ovaries in queens and workers [24] and response to the reproductive  
99 protein *vitellogenin* [25]. Together, these studies suggest that miRNAs could play a role in the  
100 evolution of eusociality through their effects on gene regulatory networks involved in socially-  
101 relevant traits. A rigorous test of this hypothesis requires comparisons of the presence,  
102 expression, and function of miRNAs across related species that vary in social organization.

103

104           Here we present a comprehensive comparative analysis of miRNAs across bee species  
105 with variable social organization. These solitary and social species shared a common ancestor  
106 ~75-110 mya [26]. Previous comparative studies of miRNAs associated with eusociality have  
107 relied on the parasitoid wasp, *Nasonia vitripennis*, as a solitary comparison [16]. This is a far  
108 more distant relative to the social insects, sharing a last common ancestor with bees nearly 200  
109 mya [26]. Moreover, the parasitoid lifestyle of *N. vitripennis* is different from that of eusocial  
110 bees in nearly every way. The lifestyle of solitary bees, such as the ones we include in this study,  
111 share many features of their natural history with the presumed ancestors from which eusociality  
112 evolved.

113

114           We first looked for miRNA repertoire expansions associated with eusociality by scanning  
115 12 bee genomes for known miRNAs, and statistically evaluating copy-number of each miRNA  
116 type with regard to differences in sociality in a phylogenetic model. We then described and  
117 compared miRNAs expressed in the brains of six bee species from three families that include  
118 repeated origins of eusociality. We tested the hypothesis that changes in gene regulatory function  
119 associated with social evolution are facilitated by lineage-specific miRNA regulatory function  
120 with two predictions: (1) If lineage-specific miRNAs are assimilated into ancestral gene  
121 networks, their predicted target genes should be ancient and conserved. (2) If lineage-specific  
122 miRNAs play a role in social evolution, their predicted targets should be enriched for genes that  
123 function in social behavior (e.g., caste-biased expression) or genes that are under selection in  
124 social species.

125

## 126 MATERIALS AND METHODS

### 127 Sample Acquisition

128 We used adult females from six bee species for our study (Fig. 1). These species include  
129 both eusocial and solitary species with well-studied behavior from three families. *Megalopta*  
130 *genalis* samples were collected on Barro Colorado Island, Panama in 2015 and exported to the  
131 U.S.A. (permit SEX/A-37-15). *Nomia melanderi* samples were collected in Touchet, WA,  
132 U.S.A. with permission from land owners. *Megachile rotundata* samples were collected from  
133 Logan, UT, U.S.A. on the Utah State University campus. *Bombus impatiens* samples were  
134 collected from a commercial colony purchased from BioBest. *Bombus terrestris* samples were  
135 collected from colonies obtained from Pollination Services Yad-Mordechai, Kibbutz Yad-  
136 Mordechai, Israel. *Apis mellifera* samples were collected from hives in Urbana-Champaign, IL or  
137 the Tyson Research Field Station, MO, U.S.A. *A. mellifera* and *Bombus* samples were workers.  
138 *M. genalis* samples were lab-reared females. All other samples were reproductive females. All  
139 samples were collected into liquid nitrogen and stored at -80 °C until dissection.

140

### 141 RNA Isolation and Sequencing

142 Head capsules from *B. impatiens*, *M. genalis*, and *N. melanderi* samples were dissected  
143 after incubation in RNALater ICE (Ambion) to remove the entire brain. We used the mirVana  
144 miRNA Isolation kit with phenol (Ambion) to isolate total RNA from individual brains. Total  
145 RNA was sent to the University of Illinois Roy J. Carver Biotechnology Center for library  
146 preparation with the Illumina TruSeq Small RNA Sample Preparation kit and sequencing.  
147 Libraries were pooled, quantitated by qPCR, and sequenced on one lane for 51 cycles on a HiSeq  
148 2500.

149

150 Whole brains of *A. mellifera*, *B. terrestris*, and *M. rotundata* were dissected from frozen  
151 heads. Total RNA from individual brains was isolated using TRIzol reagent (Thermo Fisher  
152 Scientific). All subsequent small-RNA sequencing steps were performed by the Genome  
153 Technologies Access Center at Washington University, using their Illumina TruSeq pipeline.  
154 Total RNA samples were size fractionated and multiplexed. Single-end small RNA libraries  
155 were prepared using the SMARTer kit (Clontech). Up to 12 barcoded libraries from a single  
156 species were run on a single Illumina HiSeq 2500 lane.

157

### 158 **miRNA Discovery and Quantification**

159 We used miRDeep2 [27] to identify and quantify miRNAs expressed in the brains of each  
160 species, with a three-step process of miRNA detection to identify homologous miRNAs between  
161 species. First, we gathered a set of mature miRNA sequences previously described in other insect  
162 species (Table S1). Reads for each sample were quality filtered (minimum length 18, removal of  
163 reads with non-standard bases), adapter-trimmed, and aligned to the species' genome (Table S2)  
164 with the mapper.pl script. Approximately 60-84% of reads successfully mapped.

165

166 We then identified known and novel miRNAs in each sample with the miRDeep2.pl  
167 script, using our curated set of insect miRNAs (Table S1) as known mature sequences. We  
168 followed this with the quantifier.pl script to generate sets of known and novel miRNAs in each  
169 sample, along with quantified expression information for each. We then filtered novel miRNAs  
170 in each species according to the following criteria: no rRNA/tRNA similarities, minimum of five

171 reads each on the mature and star strands of the hairpin sequence, and a randfold p-value < 0.05.  
172 Randfold describes the RNA secondary structure of potential pre-miRs [27].

173

174 We used these filtered miRNAs in a second run of detection and quantification, adding  
175 the mature sequences of novel miRNAs from each species to our set of known miRNAs, and  
176 repeated the pipeline above. This allowed detection of homologous miRNAs (based on matching  
177 seed sequences) that are not represented in miRBase across our species. We applied the same set  
178 of filtering criteria as for our first run.

179

180 Some of the novel miRNAs may exist in the genomes of other bees, even if they are not  
181 expressed. We used blastn (-perc\_identity 50 -evalue 1e-5) to search for homologous precursor  
182 miR (pre-miR) sequences in 12 bee genomes (Table S2) for each of the novel miRNAs without a  
183 matching seed sequence.

184

### 185 **miRNA Localization**

186 We used bedtools intersect [28] to find overlap of miRNAs with predicted gene models  
187 (Table S3), and repetitive element repeatmasker [29] annotations from previously established  
188 repeat libraries [4,30–33].

189

### 190 **Target Prediction**

191 We extracted potential target sites 500 bp downstream from each gene model using  
192 bedtools flank and getfasta [28], following previous studies [21] and an average 3' UTR region  
193 of 442 nt in *Drosophila melanogaster* [34]. Target prediction was run with miRanda v3.3 [35]



194 (minimum energy threshold -20, minimum score 140, strict alignment to the seed region [-en -20  
195 -sc 140 -strict]) and RNAhybrid v2.12 [36] (minimum free energy threshold -20). We kept only  
196 miRNA-target gene pairs that were predicted by both programs with  $p < 0.01$ .

197

## 198 **Target Age and Functional Enrichment**

199 Gene ages were determined using orthogroups from OrthoDB v9 [37], which includes *A.*  
200 *mellifera*, *B. impatiens*, *B. terrestris*, and *M. rotundata*. Gene sets of *M. genalis* and *N. melanderi*  
201 were mapped to Metazoa-level (330 species) orthogroups. Gene sets of *M. genalis* and *N.*  
202 *melanderi* were mapped to Metazoa-level (330 species) orthogroups. Gene ages were inferred  
203 from the taxonomic breadth of all species in each orthogroup: Vertebrata ( $\geq$  one vertebrate),  
204 Metazoa ( $\geq$  one non-arthropod and non-vertebrate metazoans), Arthropoda ( $\geq$  one non-insect  
205 arthropods), Insecta ( $\geq$  one non-holometabolous insects), Holometabola ( $\geq$  one non-  
206 hymenopteran holometabolous insects), Hymenoptera ( $\geq$  one non-Aculeata hymenopterans),  
207 Aculeata ( $\geq$  one non-Apoidea Aculeata), Apoidea ( $\geq$  one other Apoidea). Genes without  
208 identifiable orthologs were labeled ‘Unique’.

209

210 Gene Ontology (GO) terms for each species were derived from a previous study [4], with  
211 the exception of *B. impatiens*, for which GO terms were assigned based on reciprocal blastp  
212 (evalue  $< 1e^{-5}$ ) between two sets of gene models (OGS v1.2 and OGS v1.0). Functional  
213 enrichment was performed with the GOfats package [38] in R [39]. We included terms enriched  
214 at an unadjusted  $p < 0.1$ .

215

## 216 **Enrichment tests of lineage-specific miRNA targets with previous studies**

217 For each species, brain or head gene expression datasets related to socially relevant  
218 phenotypes (e.g., caste) and genes under positive selection were compared against targets of  
219 lineage-specific miRNAs. The complete list of included studies and gene lists are in Table S4.  
220 For *M. genalis* caste data, RNAseq reads from Jones et al. [40] (NCBI PRJNA331103) were  
221 trimmed using Trimmomatic (v. 0.36) [41] and aligned to an unpublished genome assembly of  
222 *M. genalis* (NCBI PRJNA494872) using STAR (v. 2.5.3) [42]. Reads were mapped to gene  
223 features using featureCounts in the Subread package (v. 1.5.2) [43]. Remaining differential  
224 expression analysis followed the methods of Jones et al. [40] using edgeR [44].

225

226 We also tested datasets identifying genes under selection in bee species or across social  
227 lineages of bees for enrichment of lineage-specific miRNA targets (Table S4). When necessary,  
228 we used reciprocal blastp (evalue  $< 10e^{-5}$ ) to identify orthologous genes across species, and only  
229 genes with putative orthologs were included in the analysis. Hypergeometric tests (using phyper  
230 in R) were used to test for significance of over- or under-enrichment between each pair of lists.  
231 The representation factor (RF) given represents the degree of overlap relative to random  
232 expectation (RF=1). RF is calculated as  $RF=x/E$ , where  $x$  is the number of genes in common  
233 between two lists and  $E$  is the expected number of shared genes ( $E = nD/N$ , where  $n$  is the  
234 number of genes in list 1,  $D$  is the number of genes in list 2, and  $N$  is the total number of genes.)

235

## 236 **miRNA Diversification**

237 We performed genome scans for small RNAs across 12 bee genomes (Table S2) using  
238 covariance models implemented with Infernal cmsearch using the gathering threshold for

239 inclusion (--cut\_ga) [45] to find all Rfam accessions in each bee genome. We used Spearman  
240 rank regressions to test for significant associations between miRNA copy-number and social  
241 biology. We categorized each species as solitary, facultative basic eusocial, obligate basic  
242 eusocial, or obligate complex eusocial following Kapheim et al. [4]. We used the ape package  
243 [46] in R [39] to calculate phylogenetic independent contrasts for both social organization and  
244 miRNA copy-number, cor.test to implement the Spearman's rank correlation, and p.adjust with  
245 the Benjamini-Hochberg method to correct for multiple comparisons.

246

## 247 **RESULTS**

### 248 **Low levels of miRNA copy-number variation among bee genomes**

249 Our genome scans revealed very little variation in copy-number of most miRNAs among  
250 bee genomes. Of the 50 miRNA Rfam accessions, half had the same number of copies (1 or 2) in  
251 all 12 bee genomes (Table S5). The mean copy-number across all miRNAs in all bee genomes  
252 was  $1.19 \pm 0.74$ . One exception was miR-1122, for which we found 70 copies in *M. genalis*, but  
253 no copies in the other species. We did not find any significant associations between miRNA  
254 copy-number and social organization (Table S5).

255

### 256 **Expressed miRNA diversity in bee brains**

257 We identified 97-245 known and novel miRNAs expressed in the brains of each of our  
258 six species (Table S6). The majority of these were located in intergenic regions or introns (Table  
259 1). Each species had at least one miRNA that originated from exons of protein-coding genes and  
260 repetitive DNA (Table 1). Most of the overlap between miRNA precursors and repetitive DNA

261 corresponded to uncharacterized repeat elements, with very few overlaps with well-characterized  
262 transposons or retrotransposons (Table 1).

263

264 Most of the detected miRNAs in each species had known homologs in at least one other  
265 species. However, each species had a substantial proportion (20-35%) of detected miRNAs with  
266 lineage-specific expression in the brain (Table 1; Fig. 1A), 24-72% of which did not have any  
267 known homologs in other species (Table 1). We defined lineage-specific miRNAs as those with  
268 lineage-specific expression and for which no seed match with a known mature miRNA was  
269 identified (Table 1, columns 6-7), because these show the most evidence of being real miRNAs  
270 that are unique to a particular species. (Sequence similarity of pre-miRs in the genome of other  
271 bee species is not sufficient evidence that a mature miRNA is transcribed.) Lineage-specific  
272 miRNAs had significantly lower expression levels compared with homologous miRNAs in each  
273 species (t-tests: *A. mellifera*,  $p = 3.81e^{-05}$ , *B. impatiens*,  $p = 0.003$ , *B. terrestris*,  $p = 0.006$ , *M.*  
274 *genalis*,  $p = 0.0003$ , *M. rotundata*,  $p = 8.00e^{-05}$ , *N. melanderi*,  $p = 0.02$ ).

275

276 Lineage-specific miRNAs were localized both within genes and intergenically. The  
277 proportion of lineage-specific miRNAs that were intra- or intergenic was similar to miRNAs  
278 with homologs for every species except *N. melanderi*, for which a disproportionate number of  
279 lineage-specific miRNAs were intragenic ( $\chi^2 = 4.78$ ,  $p = 0.03$ ). Genes that serve as hosts for  
280 intragenic lineage-specific miRNAs were not significantly older than would be expected by  
281 chance (i.e., belong to orthogroups shared with vertebrates) in any species (hypergeometric tests:  
282  $p = 0.14-0.76$ ). Across all species, genes that serve as hosts for intragenic lineage-specific

283 miRNAs were not significantly older than genes hosting miRNAs with known homologs ( $\chi^2$   
 284 tests:  $p = 0.05-0.89$ ).

285

286 **Table 1.** Localization of miRNAs in the genomes of six bee species. Numbers not in parentheses  
 287 represent features on the same strand as the pre-miR. Numbers in parentheses indicate strand  
 288 mismatch. Some pre-miRs overlapped with one or more genes on both the same and opposite  
 289 strands, and are thus counted twice (*A. mellifera* and *M. genalis* – 1, *B. impatiens* – 5, *B.*  
 290 *terrestris* – 4, *N. melanderi* – 3). Seed match – Mature miR had a seed match with a known miR;  
 291 Pre-miR – Successful blastn hit to the pre-miR sequence in at least one other bee genome;  
 292 Unique – No homolog was found in other species (seed match to mature or blastn hit to pre-  
 293 miR).

| Species                    | Sociality            | Expressed miRs | miRs with lineage-specific expression in the brain |            |         |        | Location in the genome |       |         |                      |                                |
|----------------------------|----------------------|----------------|----------------------------------------------------|------------|---------|--------|------------------------|-------|---------|----------------------|--------------------------------|
|                            |                      |                | Total                                              | Seed match | Pre-miR | Unique | Intergenic             | Exon  | Intron  | Transposable element | Uncharacterized repetitive DNA |
| <i>Apis mellifera</i>      | Complex eusocial     | 97             | 25                                                 | 0          | 15      | 10     | 45                     | 5     | 38 (10) | 0                    | 0                              |
| <i>Bombus impatiens</i>    | Basic eusocial       | 245            | 49                                                 | 6          | 31      | 12     | 129                    | 4 (1) | 89 (27) | 7                    | 32                             |
| <i>Bombus terrestris</i>   |                      | 150            | 31                                                 | 2          | 21      | 8      | 76                     | 1 (1) | 56 (20) | 13                   | 36                             |
| <i>Megalopta genalis</i>   | Facultative eusocial | 105            | 37                                                 | 7          | 5       | 25     | 63                     | 3     | 30 (10) | 2                    | 28                             |
| <i>Megachile rotundata</i> | Solitary             | 99             | 27                                                 | 9          | 0       | 18     | 48                     | 8 (1) | 37 (5)  | 2                    | 15                             |
| <i>Nomia melanderi</i>     | Solitary             | 97             | 29                                                 | 5          | 3       | 21     | 50                     | 8     | 34 (8)  | 2                    | 27                             |

294

295 Of the miRNAs with homologs, most were expressed in all six species, but we detected  
 296 one miRNA (miR-305) that was expressed in the brains of each of the social, but not the solitary,  
 297 species. Although we did not detect expression of miR-305 in the two solitary species, *M.*  
 298 *rotundata* and *N. melanderi*, genome scans of each species against the Rfam database suggested  
 299 all bee species have one copy of this miRNA (Table S5). Predicted targets of miR-305 differed  
 300 across species. *Oxysterol* (OG EOG091G0FV2) was a common target among the (social) Apidae

301 bees, but was not among the targets for *M. genalis*. However, *arylformamidase* (OG  
 302 EOG091G0KT8), which is also involved in lipid metabolism and transport, was a predicted  
 303 target in *M. genalis*. *Synaptobrevin* (OG EOG091G0MPE), which is involved in synaptic  
 304 plasticity and neurotransmitter release, was a predicted target of miR-305 in *B. impatiens*.  
 305

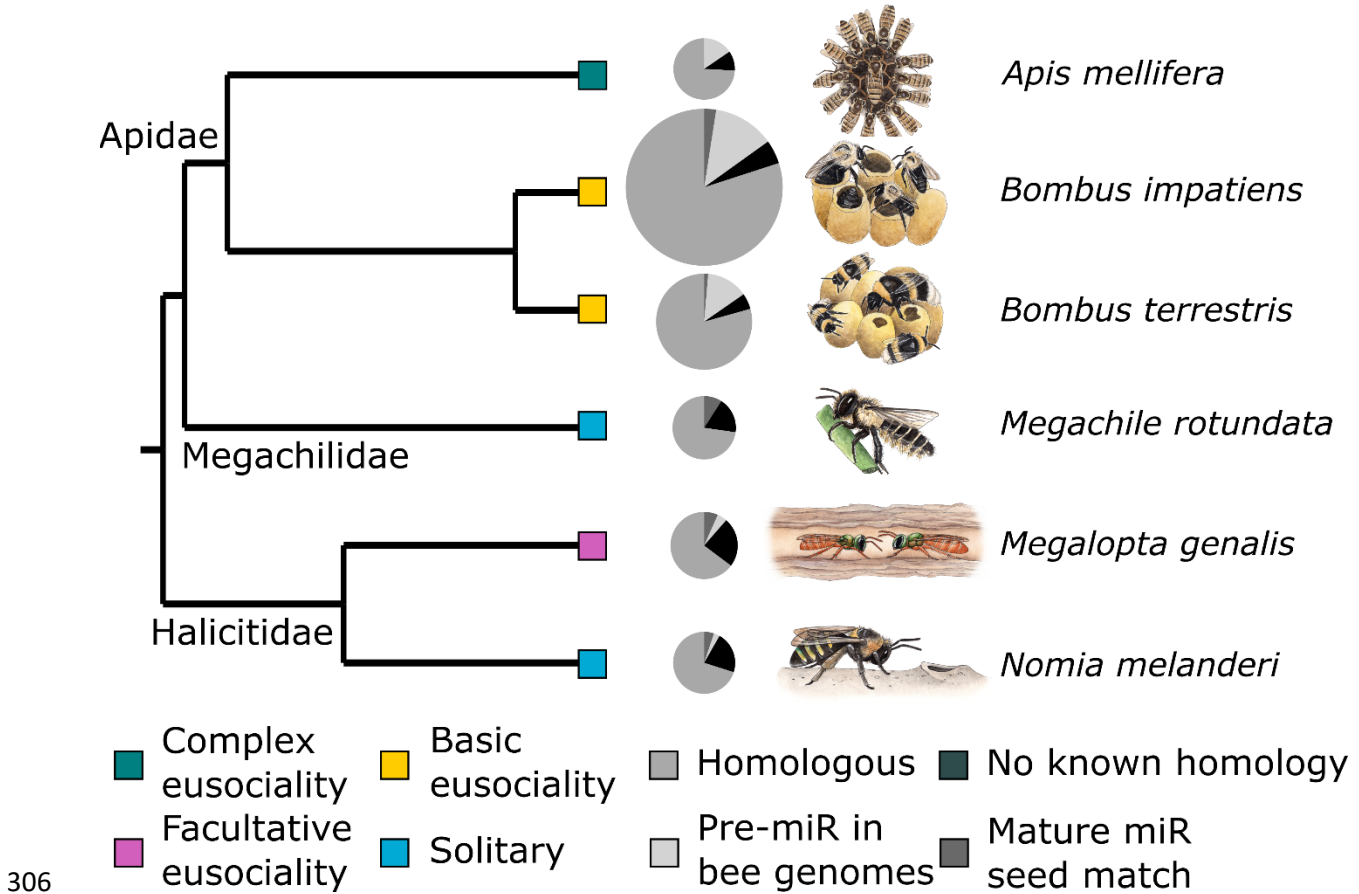

**Fig. 1. Diversity of miRNAs expressed in the brains of six bee species.** The three types of homology (shades of grey) correspond to those in Table 1. Black – has not been previously detected in other species. Pie size corresponds to number of miRNAs detected from small RNA sequencing. Boxes indicate social organization (green – complex eusociality, yellow – basic eusociality, pink – facultative eusociality, blue – solitary). Phylogenetic relationships are following previous studies [26,30,47].

314 **Lineage-specific miRNAs preferentially target lineage-specific genes and genes with caste-**  
315 **biased expression, but not genes under selection**

316 If lineage-specific changes in gene regulatory function associated with social evolution  
317 are facilitated by novel miRNAs inserted into existing gene networks, then predicted targets of  
318 lineage-specific miRNAs should be highly conserved and enriched for genes with known  
319 functions in social evolution. Most of the predicted mRNA targets of lineage-specific miRNAs  
320 were highly conserved and belonged to orthogroups shared by vertebrates (Fig. 2; Table S8).  
321 However, most genes in each genome are also highly conserved, and there was not a significant  
322 enrichment for conserved genes among predicted targets of lineage-specific miRNAs, beyond  
323 what would be expected by chance (hypergeometric test:  $p > 0.99$ ). We did, however, find a  
324 significant enrichment for genes unique to each species among the predicted targets of lineage-  
325 specific miRNAs (hypergeometric tests: *A. mellifera* – RF = 1.51,  $p = 5.44e^{-5}$ ; *B. impatiens* – RF  
326 = 1.28,  $p = 0.02$ ; *B. terrestris* – RF = 1.78,  $p = 1.90e^{-6}$ ; *M. rotundata* – RF = 1.79,  $p = 0.0002$ ; *M.*  
327 *genalis* – RF = 1.62,  $p = 1.48e^{-12}$ ; *N. melanderi* – RF = 1.78,  $p = 9.02e^{-5}$ ), indicating that novel  
328 miRNAs are more likely to target novel genes than would be expected by chance (Fig. 2; Table  
329 S8).  
330

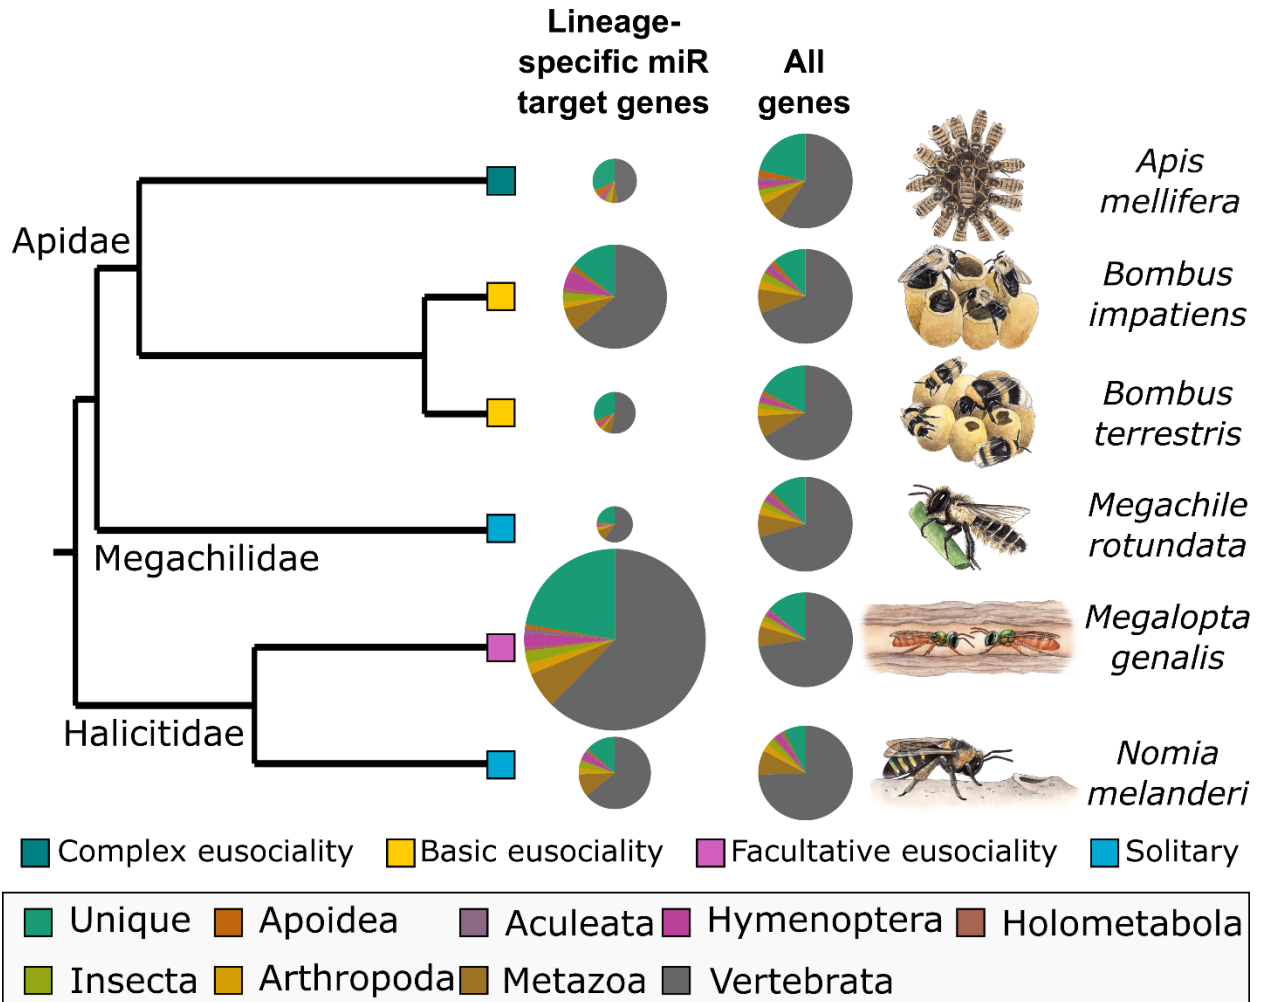

331  
332  
333  
334  
335  
336  
337  
338  
339

**Fig. 2.** Age of genes targeted by lineage-specific miRNAs. Genes predicted to be targeted by lineage-specific miRNAs are more likely to be unique to each species than predicted by chance. Pie chart size is scaled to number of predicted target genes for lineage-specific miRNAs, but not for all genes. Color slices indicate orthogroup age for each predicted gene. The green slice (lineage-specific genes) is larger for the set of genes predicted to be targeted by lineage-specific miRNAs than for all genes.

340  
341  
342  
343  
344

We found mixed support for the prediction that novel miRNAs should target genes that function in social behavior and evolution. The predicted targets of lineage-specific miRNAs were enriched for genes differentially expressed between castes in the social Apidae (*A. mellifera* and *B. terrestris*), but not Halictidae (*M. genalis*) (Fig. 3; Table S4). In *A. mellifera*, this included genes upregulated in the brains of reproductive workers, compared with sterile workers



345 (hypergeometric test:  $RF = 3.4$ ,  $p = 0.007$ ) and queens (hypergeometric test:  $RF = 1.6$ ,  $p = 0.015$ )  
346 [48], as well as genes upregulated in the brains of foragers compared with nurses  
347 (hypergeometric test:  $RF = 2.8$ ,  $p = 0.011$ ) [49]. However, there was no significant enrichment  
348 for genes differentially expressed between nurse and forager honey bee brains in a later study  
349 (hypergeometric test:  $p = 0.09$ ) [50]. In *B. terrestris*, we found significant overlap between the  
350 predicted targets of lineage-specific miRNAs and genes that are upregulated in workers,  
351 compared to queens (whole body, including brain; hypergeometric test:  $RF = 2$ ,  $p = 0.013$ ). We  
352 did not find significant overlap with genes differentially expressed in the brains of nurses and  
353 foragers (hypergeometric test:  $p = 0.103$ ) [51] or between reproductive and sterile worker brains  
354 (hypergeometric test:  $p = 0.39$ ) [52], but these were much more limited gene sets. To our  
355 knowledge, there are no studies of gene expression differences between *B. impatiens* castes, so  
356 we could not evaluate target overlap with caste-biased genes in this species. We did not find  
357 significant enrichment for caste-biased genes in the brains of the facultatively eusocial *M.*  
358 *genalis* (hypergeometric test:  $p = 0.25$ ).

359  
360 Contrary to our prediction, targets of lineage-specific miRNAs were not significantly  
361 enriched for genes under selection in any species. We assessed overlaps between genes  
362 undergoing positive directional selection in *A. mellifera* [53], *B. impatiens* [54], *M. genalis* [33],  
363 and *N. melanderi* [32] and the predicted targets of lineage-specific miRNAs in each species.  
364 There was no significant enrichment for targets of lineage-specific miRNAs with genes under  
365 positive directional selection in any species (Table S4). In fact, genes under selection in the  
366 halictid bees were significantly depleted for targets of lineage-specific miRNAs (hypergeometric  
367 test: *M. genalis* –  $RF = 0.2$ ,  $p = 4.28e^{-10}$ ; *N. melanderi* –  $RF = 0.3$ ,  $p = 5.59e^{-4}$ ). We also assessed

368 overlaps with genes previously found to be under positive selection in social species, compared  
 369 to solitary species [4,55], but found only marginally significant overlap [4] or depletion [55] with  
 370 predicted targets of lineage-specific genes in one species (hypergeometric tests: *M. genalis* – RF  
 371 = 1.9,  $p = 0.053$ ; RF = 0,  $p = 0.05$ ; Table S4).  
 372

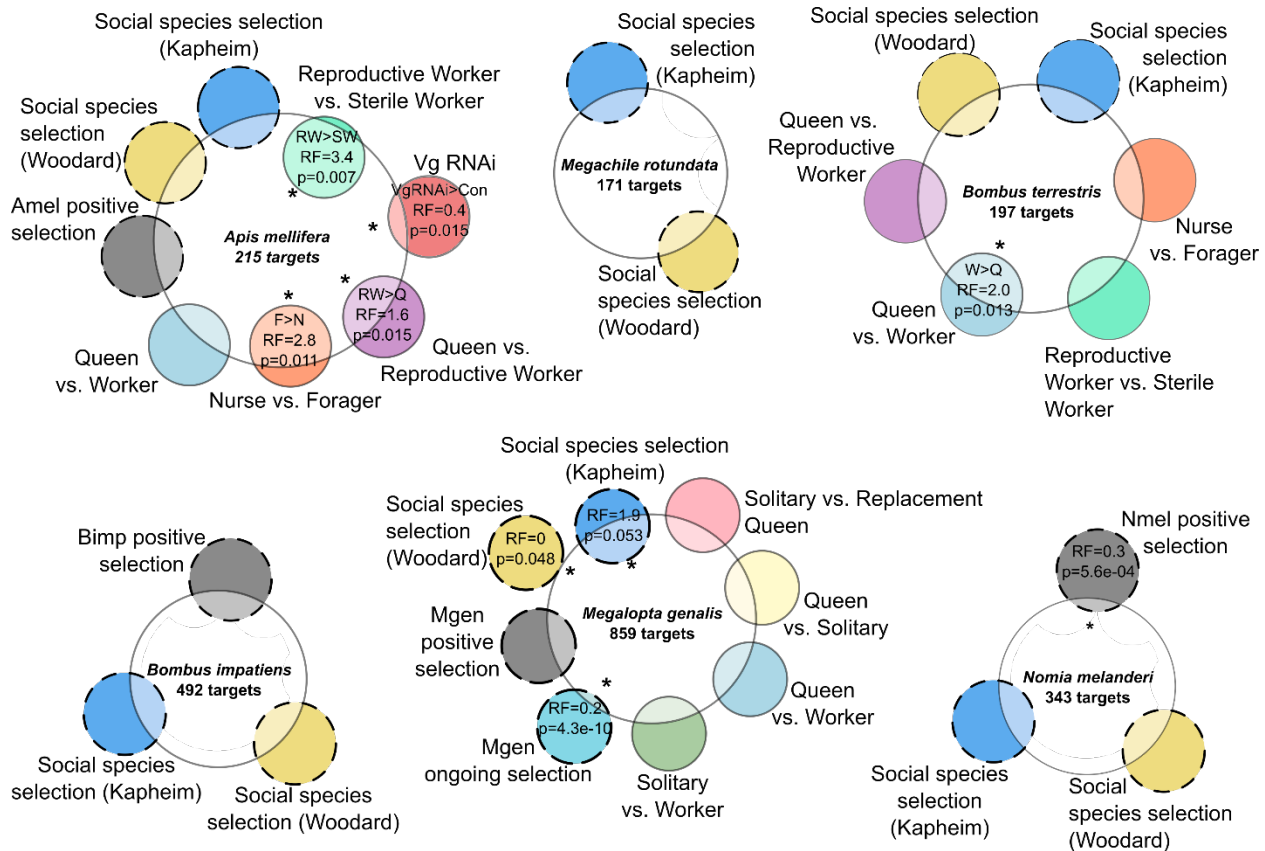

373  
 374 **Fig. 3.** Predicted targets of lineage-specific miRNAs in relation to social behavior. Genes that are  
 375 both predicted targets of lineage-specific miRNAs and genes with differential expression in a  
 376 social context (solid outlines) or genes under selection (dashed outlines) are represented by  
 377 overlapping circles for each study and species. Numbers of lineage-specific miRNA targets are  
 378 given for each species. Colors indicate different studies. Overlaps not significantly different from  
 379 random (representation factor, RF=1) are unlabeled, while significant over- or under-enrichments  
 380 are marked with asterisks with RF and p-value as indicated.  
 381

## 382 DISCUSSION

383 Eusociality is a major evolutionary innovation that requires regulatory changes in a wide  
384 range of molecular pathways [1]. We tested the hypothesis that miRNAs play a role in the  
385 evolution of eusociality via their regulatory effects on gene networks by comparing miRNA  
386 expression in three eusocial and three solitary bee species from three families. Our results  
387 provide several lines of support for this hypothesis.

388

389 We identified a single miRNA (miR-305) that was expressed exclusively in the brains of  
390 the social bees in our study. The presence of this miRNA in the solitary bee genomes suggests  
391 that an evolutionary shift in expression pattern has accompanied at least two independent origins  
392 of eusociality in bees. This miRNA coordinates Insulin and Notch signaling in *D. melanogaster*,  
393 and both of these pathways are important regulators of social dynamics in insects [56–60].  
394 Interestingly, this miRNA is also upregulated in worker-destined compared to queen-destined  
395 honey bee larvae, and may thus play a role in caste differentiation [22]. Further investigation  
396 with additional social and solitary species is necessary to determine how this miRNA may  
397 influence social behavior across species.

398

399 We focused attention on miRNAs for which no mature miRNAs with seed matches were  
400 detected in any other species, because these have the potential to influence the lineage-specific  
401 patterns of gene regulatory changes previously shown to influence social evolution [3,4]. We  
402 hypothesized that if novel miRNAs are inserted into existing gene networks that become co-  
403 opted for social evolution, they should target genes that are highly conserved across species.  
404 Instead, we find that the targets of lineage-specific miRNAs are enriched for lineage-specific

405 genes, while genes belonging to ancient orthogroups were not more likely to be targets than  
406 expected by chance. This suggests that novel miRNAs co-evolve with novel genes, as has been  
407 shown for the evolution of cognitive function in humans [61]. Previous work in honey bees has  
408 shown that taxonomically-restricted genes play an important role in social evolution. Expression  
409 of taxonomically-restricted genes is significantly biased toward glands with specialized functions  
410 for life in a social colony (e.g., the hypopharyngeal gland and the sting gland) [62], and toward  
411 genes that are upregulated in workers [63]. Thus, it is reasonable to expect that new miRNAs  
412 targeting new genes could have important social functions.

413

414         Alternatively, it is possible that new miRNAs targeting lineage-specific genes are  
415 transient and will be purged by natural selection because they are less integrated into existing  
416 gene networks [10,64,65]. Emergent miRNAs are expected to initially have limited expression to  
417 mitigate potential deleterious effects on the protein-coding genes they target. Thus, lineage-  
418 specific miRNAs with low levels of expression may be in the process of being purged and may  
419 not have accumulated gene targets with important functions [9,10]. Evidence for this model  
420 comes from primates [66] and flies [11,67]. Likewise, we find that lineage-specific miRNAs are  
421 expressed at significantly lower levels than those with at least one homolog in another species. A  
422 purging process could explain why there are large differences in the numbers of miRNAs  
423 detected in even closely related species (e.g., the two *Bombus* species). Functional analysis of  
424 lineage-specific genes in additional tissues and life stages will help to resolve their roles in social  
425 evolution.

426

427 We find support for the prediction that lineage-specific miRNAs should target genes with  
428 social function in the Apidae (e.g., honey bees and bumble bees), but not the Halictidae (*M.*  
429 *genalis*). One explanation for this pattern is technical. We define genes with social functions as  
430 those that are differentially expressed among castes. The genetic basis of social behavior has  
431 been much better studied in honey bees and bumble bees than in any other species, and the sets  
432 of genes known to function in sociality is thus richer for apids than for halictids. Further, not all  
433 genes that function in social behavior are expected to be differentially expressed in the brains of  
434 different castes, and our analysis is thus likely to exclude some important genes.

435  
436 Nonetheless, our results reflect differences in the antiquity and degree of social  
437 complexity, and thus caste-biased gene expression patterns, between apid and halictid bees.  
438 Eusociality has a deeper origin in the Apidae than in Halictidae [47,68], and thus more time has  
439 accumulated for associated changes in miRNA regulation to evolve. Unlike for honey bees and  
440 bumble bees, which cannot live outside of social colonies, eusociality is facultative in *M. genalis*.  
441 As such, caste traits are not fixed during development, and females who served as non-  
442 reproductive workers can become reproductive queens if given the opportunity [69]. This  
443 flexibility is reflected in the magnitude of differences in brain gene expression patterns between  
444 queen and worker honey bees (thousands of genes [48]) and *M. genalis* (dozens of genes [40]).  
445 Previous research suggests that miRNAs increase their functional influence over evolutionary  
446 time [10,11,65,66,70,71]. Thus, emergent miRNAs are more likely to target genes with social  
447 function due to chance alone in species with increased social complexity and a larger set of  
448 caste-biased genes. Consistent with this explanation, regulatory relationships between miRNAs

449 and genes with caste-biased expression were not found among two other social insect species  
450 with reduced social complexity [72].

451

452 An additional explanation for these differences in the function of lineage-specific  
453 miRNAs concerns the role of miRNAs in gene regulatory networks. One of these roles is to  
454 stabilize regulatory relationships in the face of environmental variation, thus canalizing  
455 phenotypes during development [9,73–75]. This is likely to be more important in species with  
456 obligate eusociality, such as the honey bees and bumble bees for which caste determination is  
457 canalized, than in species like *M. genalis*, where plasticity of phenotypes related to eusociality  
458 are maintained in totipotent females.

459

460 Contrary to their effects on genes with socially-differentiated expression patterns,  
461 lineage-specific miRNAs showed no evidence for preferential targeting of genes under positive  
462 selection – either within or across species. In contrast, we find these emergent miRNAs are less  
463 likely than expected by chance to target genes under positive selection in the two halictid bees. A  
464 potential explanation for this pattern is that genes adaptively targeted by miRNAs tend to be  
465 under purifying selection to maintain the regulatory relationship between the miRNA and target,  
466 thus preventing gene mis-expression [76–78]. This selective constraint is likely to be most  
467 significant in the 3' UTR region, where miRNA binding sites are located.

468

469 A more likely explanation involves the hypothesized pattern of miRNA origins and  
470 assimilation, as proposed by Chen and Rajewsky [10]. This model suggests that new miRNAs  
471 are likely to have many targets throughout the genome due to chance. Most of these initial

472 miRNA-target regulatory relationships are likely to have slightly deleterious effects, and would  
473 be quickly purged through purifying selection. These deleterious effects could be particularly  
474 strong for target genes undergoing positive selection, because changes in the functional  
475 regulation of these genes are likely to have significant fitness consequences. Also, genes under  
476 positive selection are undergoing rapid evolution, and thus may be more likely to “escape”  
477 control by errant miRNAs. Indeed, it is easier for mRNAs to lose miRNA target binding sites,  
478 which typically require exact sequence matches, than to gain them [10]. Thus, emergent miRNAs  
479 may not be expected to target adaptively or fast evolving genes, regardless of their role in social  
480 evolution.

481

482         The evolution of eusociality depends on many different tissues and physiological  
483 processes, and brain-specific expression patterns are not likely to be representative of the  
484 complete role of individual miRNAs in social behavior. Some or all of the predicted miRNA-  
485 gene relationships we identified may have evolved to support traits in other cell types or  
486 processes unrelated to sociality. Additional sequencing of miRNA and mRNA across tissue-  
487 types and stages of development in social and solitary species is necessary to provide a  
488 comprehensive assessment of the role of emergent miRNAs in social traits. Nonetheless, the  
489 brain is a major focus of research in social evolution because it is the primary source of  
490 behavioral and neuroendocrine output. Our results thus provide a good starting place for  
491 evaluating the role of miRNAs in lineage-specific processes in the evolution of social behavior.

492

493         Our analyses reveal important differences in patterns of miRNA evolution between bees  
494 and other species. For example, expansion in miRNA repertoire is associated with the evolution

495 of animal complexity in a wide range of species [9,12,13]. The evolution of eusociality from a  
496 solitary ancestor is associated with increases in phenotypic complexity, and considered to be one  
497 of the major transitions in evolution [79]. We therefore hypothesized that evolutionary increases  
498 in social complexity would be associated with expansions in the number of miRNAs found  
499 within bee genomes. To the contrary, we find that most bees have a single copy of previously  
500 identified miRNAs in their genomes. This is consistent with results of comparative genome scans  
501 across several ant species [3]. A recent study of miRNA diversity in insects found that  
502 morphological innovations such as holometabolous development was accompanied by the  
503 acquisition of only three miRNA families [15]. This suggests that insect evolution is not as  
504 reliant on major expansions of miRNA families as other taxonomic groups.

505  
506         Additionally, our characterization of lineage-specific miRNAs expressed in the brain of  
507 each species reveals that genome structure is not as influential in regulating bee miRNA  
508 evolution as has been shown for human miRNAs. Novel human miRNAs tend to arise within  
509 ancient genes that have multiple functions and broad expression patterns [65]. It is hypothesized  
510 that this increases the expression repertoire of emergent miRNAs, and thus facilitates persistence  
511 in the population [64,65]. Only in one species (*N. melanderi*) were lineage-specific miRNAs  
512 more likely to be localized intragenically than previously identified miRNAs, while lineage-  
513 specific miRNAs did not differ from previously identified miRNAs in their genomic locations in  
514 the other five species. This suggests emergence patterns for new miRNAs are unique to each  
515 lineage in bees. We also do not find a consistent pattern between young, emerging miRNAs and  
516 host gene age. There was no significant difference in the age of genes that serve as hosts for  
517 established versus lineage-specific miRNAs across species. This is despite the fact that a similar



518 proportion of bee miRNAs are located within introns (31-43%; Table 1), compared to in  
519 vertebrates (36-65%) [8]. However, the fact that 73-88% of miRNAs localized to genes are  
520 encoded on the sense strand suggests that they would benefit from host transcription, as is  
521 observed in vertebrates [8]. Additional research with insects will be necessary to identify general  
522 patterns of miRNA evolution in relationship to genome structure.

523  
524 Our study identifies patterns of miRNA evolution in a set of closely related bees that vary  
525 in social organization. Our results highlight important similarities and differences in the  
526 emergence patterns and functions of mammalian and insect genomes. We find evidence that  
527 emergent miRNAs function in lineage-specific patterns of social evolution, perhaps through co-  
528 evolution of novel miRNAs and species-specific targets. We do not see an overall increase in the  
529 number of miRNAs in the genome or expressed in the brains of species with more complex  
530 eusociality. However, we do find evidence that the role of miRNAs in social evolution may  
531 strengthen with increasing social complexity, perhaps due to an increased need for canalization  
532 of caste determination or due to chance, as a function of an increased number of genes with  
533 caste-biased expression. Empirical tests of miRNA function across additional species with  
534 variable social organization will further improve our understanding of how gene regulatory  
535 evolution gives rise to eusociality.

536

## 537 REFERENCES

- 538 1. Sumner S, Bell E, Taylor D. 2018 A molecular concept of caste in insect societies. *Curr.*  
539 *Opin. Insect Sci.* **25**, 42–50. (doi:10.1016/j.cois.2017.11.010)
- 540 2. Whitfield CW, Band MR, Bonaldo MF, Kumar CG, Liu L, Pardinas JR, Robertson HM,

- 541 Soares MB, Robinson GE. 2002 Annotated expressed sequence tags and cDNA  
542 microarrays for studies of brain and behavior in the honey bee. *Genome Res.* **12**, 555–566.
- 543 3. Simola DF *et al.* 2013 Social insect genomes exhibit dramatic evolution in gene  
544 composition and regulation while preserving regulatory features linked to sociality.  
545 *Genome Res.* **23**, 1235–1247. (doi:10.1101/gr.155408.113)
- 546 4. Kapheim KM *et al.* 2015 Genomic signatures of evolutionary transitions from solitary to  
547 group living. *Science* **348**, 24–32. (doi:10.1126/science.aaa4788)
- 548 5. Warner MR, Qiu L, Holmes MJ, Mikheyev AS, Linksvayer TA. 2019 Convergent  
549 eusocial evolution is based on a shared reproductive groundplan plus lineage-specific  
550 plastic genes. *Nat. Commun.* **10**, 2651. (doi:10.1038/s41467-019-10546-w)
- 551 6. Bartel DP. 2018 Metazoan microRNAs. *Cell* **173**, 20–51. (doi:10.1016/j.cell.2018.03.006)
- 552 7. Friedman RC, Farh KK-H, Burge CB, Bartel DP. 2009 Most mammalian mRNAs are  
553 conserved targets of microRNAs. *Genome Res.* **19**, 92–105. (doi:10.1101/gr.082701.108)
- 554 8. Meunier J, Lemoine F, Soumillon M, Liechti A, Weier M, Guschanski K, Hu H,  
555 Khaitovich P, Kaessmann H. 2013 Birth and expression evolution of mammalian  
556 microRNA genes. *Genome Res.* **23**, 34–45. (doi:10.1101/gr.140269.112)
- 557 9. Berezikov E. 2011 Evolution of microRNA diversity and regulation in animals. *Nat. Rev.*  
558 *Genet.* **12**, 846–860. (doi:10.1038/nrg3079)
- 559 10. Chen K, Rajewsky N. 2007 The evolution of gene regulation by transcription factors and  
560 microRNAs. *Nat. Rev. Genet.* **8**, 93–103. (doi:10.1038/nrg1990)
- 561 11. Lu J, Shen Y, Wu Q, Kumar S, He B, Shi S, Carthew RW, Wang SM, Wu C-I. 2008 The  
562 birth and death of microRNA genes in *Drosophila*. *Nat. Genet.* **40**, 351–355.  
563 (doi:10.1038/ng.73)

- 564 12. Christodoulou F *et al.* 2010 Ancient animal microRNAs and the evolution of tissue  
565 identity. *Nature* **463**, 1084–1088. (doi:10.1038/nature08744)
- 566 13. Heimberg AM, Sempere LF, Moy VN, Donoghue PCJ, Peterson KJ. 2008 MicroRNAs  
567 and the advent of vertebrate morphological complexity. *Proc. Natl. Acad. Sci. U. S. A.*  
568 **105**, 2946–50. (doi:10.1073/pnas.0712259105)
- 569 14. Wheeler BM, Heimberg AM, Moy VN, Sperling EA, Holstein TW, Heber S, Peterson KJ.  
570 2009 The deep evolution of metazoan microRNAs. *Evol. Dev.* **11**, 50–68.  
571 (doi:10.1111/j.1525-142X.2008.00302.x)
- 572 15. Ylla G, Fromm B, Piulachs MD, Belles X. 2016 The microRNA toolkit of insects. *Sci.*  
573 *Rep.* **6**, 1–13. (doi:10.1038/srep37736)
- 574 16. Søvik E, Bloch G, Ben-Shahar Y. 2015 Function and evolution of microRNAs in eusocial  
575 Hymenoptera. *Front. Genet.* **6**, 1–11. (doi:10.3389/fgene.2015.00193)
- 576 17. Greenberg JK *et al.* 2012 Behavioral plasticity in honey bees is associated with  
577 differences in brain microRNA transcriptome. *Genes, Brain Behav.* **11**, 660–670.  
578 (doi:10.1111/j.1601-183X.2012.00782.x)
- 579 18. Liu F *et al.* 2012 Next-generation small RNA sequencing for microRNAs profiling in *Apis*  
580 *mellifera*: Comparison between nurses and foragers. *Insect Mol. Biol.* **21**, 297–303.  
581 (doi:10.1111/j.1365-2583.2012.01135.x)
- 582 19. Behura SK, Whitfield CW. 2010 Correlated expression patterns of microRNA genes with  
583 age-dependent behavioural changes in honeybee. *Insect Mol. Biol.* **19**, 431–439.  
584 (doi:10.1111/j.1365-2583.2010.01010.x)
- 585 20. Weaver D *et al.* 2007 Computational and transcriptional evidence for microRNAs in the  
586 honey bee genome. *Genome Biol.* **8**, R97.

- 587 21. Ashby R, Forêt S, Searle I, Maleszka R. 2016 MicroRNAs in honey bee caste  
588 determination. *Sci. Rep.* **6**, 1–15. (doi:10.1038/srep18794)
- 589 22. Shi YY, Zheng HJ, Pan QZ, Wang ZL, Zeng ZJ. 2015 Differentially expressed  
590 microRNAs between queen and worker larvae of the honey bee (*Apis mellifera*).  
591 *Apidologie* **46**, 35–45. (doi:10.1007/s13592-014-0299-9)
- 592 23. Collins DH, Mohorianu I, Beckers M, Moulton V, Dalmay T, Bourke AFG. 2017  
593 MicroRNAs associated with caste determination and differentiation in a primitively  
594 eusocial insect. *Sci. Rep.* **7**, 1–9. (doi:10.1038/srep45674)
- 595 24. MacEdo LMF *et al.* 2016 MicroRNA signatures characterizing caste-independent ovarian  
596 activity in queen and worker honeybees (*Apis mellifera* L.). *Insect Mol. Biol.* **25**, 216–226.  
597 (doi:10.1111/imb.12214)
- 598 25. Nunes FMF, Ihle KE, Mutti NS, Simoes ZLP, Amdam G V. 2013 The gene *vitellogenin*  
599 affects microRNA regulation in honey bee (*Apis mellifera*) fat body and brain. *J Exp Biol*  
600 **216**, 3724–3732. (doi:10.1242/jeb.089243)
- 601 26. Branstetter MG, Danforth BN, Pitts JP, Faircloth BC, Ward PS, Buffington ML, Gates  
602 MW, Kula RR, Brady SG. 2017 Phylogenomic insights into the evolution of stinging  
603 wasps and the origins of ants and bees. *Curr. Biol.* **27**, 1019–1025.  
604 (doi:10.1016/j.cub.2017.03.027)
- 605 27. Friedländer MR, MacKowiak SD, Li N, Chen W, Rajewsky N. 2012 MiRDeep2  
606 accurately identifies known and hundreds of novel microRNA genes in seven animal  
607 clades. *Nucleic Acids Res.* **40**, 37–52. (doi:10.1093/nar/gkr688)
- 608 28. Quinlan AR, Hall IM. 2010 BEDTools: a flexible suite of utilities for comparing genomic  
609 features. *Bioinformatics* **26**, 841–842. (doi:10.1093/bioinformatics/btq033)

- 610 29. Smith AF., Hubley R, Green P. 2013 RepeatMasker. See <http://www.repeatmasker.org/>.
- 611 30. Sadd BM *et al.* 2015 The genomes of two key bumblebee species with primitive eusocial  
612 organization. *Genome Biol.* **16**, 76. (doi:10.1186/s13059-015-0623-3)
- 613 31. Elsik CG *et al.* 2014 Finding the missing honey bee genes: Lessons learned from a  
614 genome upgrade. *BMC Genomics* **15**, 1–29. (doi:10.1186/1471-2164-15-86)
- 615 32. Kapheim KM *et al.* 2019 Draft genome assembly and population genetics of an  
616 agricultural pollinator, the solitary alkali bee (Halictidae: *Nomia melanderi*). *G3* **9**, 625–  
617 634. (doi:10.1534/g3.118.200865)
- 618 33. Kapheim KM *et al.* Developmental plasticity shapes the genomic signatures of  
619 eusociality. *unpublished*
- 620 34. Grün D, Wang Y-L, Langenberger D, Gunsalus KC, Rajewsky N. 2005 microRNA target  
621 predictions across seven *Drosophila* species and comparison to mammalian targets. *PLoS*  
622 *Comput. Biol.* **1**, e13. (doi:10.1371/journal.pcbi.0010013)
- 623 35. Enright AJ, John B, Gaul U, Tuschl T, Sander C. 2004 MicroRNA targets in *Drosophila*.  
624 *Genome Biol.* **5**, R1. (doi:10.1186/gb-2003-5-1-r1)
- 625 36. Krüger J, Rehmsmeier M. 2006 RNAhybrid: microRNA target prediction easy, fast and  
626 flexible. *Nucleic Acids Res.* **34**, W451-4. (doi:10.1093/nar/gkl243)
- 627 37. Zdobnov EM, Tegenfeldt F, Kuznetsov D, Waterhouse RM, Simão FA, Ioannidis P,  
628 Seppely M, Loetscher A, Kriventseva E V. 2017 OrthoDB v9.1: cataloging evolutionary  
629 and functional annotations for animal, fungal, plant, archaeal, bacterial and viral  
630 orthologs. *Nucleic Acids Res.* **45**, D744–D749. (doi:10.1093/nar/gkw1119)
- 631 38. Gentleman R, Falcon S. 2013 *Package ‘GOSTats’*. 2.26.0.
- 632 39. Team RC. 2016 R: A language and environment for statistical computing.

- 633 40. Jones BM, Kingwell CJ, Wcislo WT, Robinson GE. 2017 Caste-biased gene expression in  
634 a facultatively eusocial bee suggests a role for genetic accommodation in the evolution of  
635 eusociality. *Proc. R. Soc. B Biol. Sci.* **284**. (doi:10.1098/rspb.2016.2228)
- 636 41. Bolger AM, Lohse M, Usadel B. 2014 Trimmomatic: a flexible trimmer for Illumina  
637 sequence data. *Bioinformatics* **30**. (doi:10.1093/bioinformatics/btu170)
- 638 42. Dobin A, Davis CA, Schlesinger F, Drenkow J, Zaleski C, Jha S. 2013 STAR: ultrafast  
639 universal RNA-seq aligner. *Bioinforma Oxf Engl* **29**. (doi:10.1093/bioinformatics/bts635)
- 640 43. Liao Y, Smyth GK, Shi W. 2014 featureCounts: an efficient general purpose program for  
641 assigning sequence reads to genomic features. *Bioinformatics* **30**.  
642 (doi:10.1093/bioinformatics/btt656)
- 643 44. Robinson MD, McCarthy DJ, Smyth GK. 2010 edgeR: a Bioconductor package for  
644 differential expression analysis of digital gene expression data. *Bioinformatics* **26**.  
645 (doi:10.1093/bioinformatics/btp616)
- 646 45. Cui X, Lu Z, Wang S, Jing-Yan Wang J, Gao X. 2016 CMsearch: simultaneous  
647 exploration of protein sequence space and structure space improves not only protein  
648 homology detection but also protein structure prediction. *Bioinformatics* **32**, i332–i340.  
649 (doi:10.1093/bioinformatics/btw271)
- 650 46. Paradis E, Claude J, Strimmer K. 2004 APE: analyses of phylogenetics and evolution in R  
651 language. *Bioinformatics* **20**, 289–290.
- 652 47. Cardinal S, Danforth BNB. 2011 The antiquity and evolutionary history of social  
653 behavior in bees. *PLoS One* **6**, e21086. (doi:10.1371/journal.pone.0021086)
- 654 48. Grozinger CM, Fan Y, Hoover SER, Winston ML. 2007 Genome-wide analysis reveals  
655 differences in brain gene expression patterns associated with caste and reproductive status

- 656 in honey bees (*Apis mellifera*). *Mol. Ecol.* **16**, 4837–4848. (doi:doi:10.1111/j.1365-  
657 294X.2007.03545.x)
- 658 49. Whitfield CW, Cziko A-M. M, Robinson GE. 2003 Gene expression profiles in the brain  
659 predict behavior in individual honey bees. *Science* **302**, 296–299.  
660 (doi:10.1126/science.1086807)
- 661 50. Alaux C, Le Conte Y, Adams HA, Rodriguez-Zas S, Grozinger CM, Sinha S, Robinson  
662 GE. 2009 Regulation of brain gene expression in honey bees by brood pheromone. *Genes,  
663 Brain Behav.* **8**, 309–319. (doi:10.1111/j.1601-183X.2009.00480.x)
- 664 51. Porath HT, Hazan E, Shpigler H, Cohen M, Band M, Ben-Shahar Y, Levanon EY,  
665 Eisenberg E, Bloch G. 2019 RNA editing is abundant and correlates with task  
666 performance in a social bumblebee. *Nat. Commun.* **10**, 1605. (doi:10.1038/s41467-019-  
667 09543-w)
- 668 52. Marshall H, Lonsdale ZN, Mallon EB. 2019 Methylation and gene expression differences  
669 between reproductive and sterile bumblebee workers. *Evol. Lett.* (doi:10.1002/evl3.129)
- 670 53. Harpur BA, Kent CF, Molodtsova D, Lebon JM, Alqarni AS, Oways AA, Zayed A. 2014  
671 Population genomics of the honey bee reveals strong signatures of positive selection on  
672 worker traits. *Proc Natl Acad Sci U S A* **111**, 2614–2619. (doi:10.1073/pnas.1315506111)
- 673 54. Harpur BA, Dey A, Albert JR, Patel S, Hines HM, Hasselmann M, Packer L, Zayed A.  
674 2017 Queens and workers contribute differently to adaptive evolution in bumble bees and  
675 honey bees. *Genome Biol. Evol.* **9**, 2395–2402. (doi:10.1093/gbe/evx182)
- 676 55. Woodard SH, Fischman BJ, Venkat A, Hudson ME, Varala K, Cameron SA, Clark AG,  
677 Robinson GE. 2011 Genes involved in convergent evolution of eusociality in bees. *Proc  
678 Natl Acad Sci U S A* **108**, 7472–7477. (doi:10.1073/pnas.1103457108)

- 679 56. Duncan EJ, Hyink O, Dearden PK. 2016 Notch signalling mediates reproductive  
680 constraint in the adult worker honeybee. *Nat. Commun.* **7**, 1–10.  
681 (doi:10.1038/ncomms12427)
- 682 57. Hartfelder K, Tiberio GJ, Lago DC, Dallacqua RP, Bitondi MMG. 2018 The ovary and its  
683 genes—developmental processes underlying the establishment and function of a highly  
684 divergent reproductive system in the female castes of the honey bee, *Apis mellifera*.  
685 *Apidologie* **49**, 49–70. (doi:10.1007/s13592-017-0548-9)
- 686 58. Wang Y, Azevedo S V, Hartfelder K, Amdam G V. 2013 Insulin-like peptides (AmILP1  
687 and AmILP2) differentially affect female caste development in the honey bee (*Apis*  
688 *mellifera* L.). *J Exp Biol* **216**, 4347–4357. (doi:10.1242/jeb.085779)
- 689 59. Chandra V, Fetter-Pruneda I, Oxley PR, Ritger AL, McKenzie SK, Libbrecht R, Kronauer  
690 DJC. 2018 Social regulation of insulin signaling and the evolution of eusociality in ants.  
691 *Science* **361**, 398–402. (doi:10.1126/science.aar5723)
- 692 60. Ament SA, Corona M, Pollock HS, Robinson GE. 2008 Insulin signaling is involved in  
693 the regulation of worker division of labor in honey bee colonies. *Proc. Natl. Acad. Sci. U.*  
694 *S. A.* **105**, 4226–4231. (doi:10.1073/pnas.0800630105)
- 695 61. Barbash S, Shifman S, Soreq H. 2014 Global coevolution of human microRNAs and their  
696 target genes. *Mol. Biol. Evol.* **31**, 1237–1247. (doi:10.1093/molbev/msu090)
- 697 62. Jasper WC, Linksvayer TA, Atallah J, Friedman D, Chiu JC, Johnson BR. 2015 Large-  
698 scale coding sequence change underlies the evolution of postdevelopmental novelty in  
699 honey bees. *Mol. Biol. Evol.* **32**, 334–346. (doi:10.1093/molbev/msu292)
- 700 63. Johnson B, Tsutsui N. 2011 Taxonomically restricted genes are associated with the  
701 evolution of sociality in the honey bee. *BMC Genomics* **12**, 164.



- 702 64. França GS, Hinske LC, Galante PAFF, Vibranovski MD. 2017 Unveiling the impact of  
703 the genomic architecture on the evolution of vertebrate microRNAs. *Front. Genet.* **8**, 1–8.  
704 (doi:10.3389/fgene.2017.00034)
- 705 65. França GS, Vibranovski MD, Galante PAF. 2016 Host gene constraints and genomic  
706 context impact the expression and evolution of human microRNAs. *Nat. Commun.* **7**.  
707 (doi:10.1038/ncomms11438)
- 708 66. Berezikov E, Thuemmler F, van Laake LW, Kondova I, Bontrop R, Cuppen E, Plasterk  
709 RHA. 2006 Diversity of microRNAs in human and chimpanzee brain. *Nat. Genet.* **38**,  
710 1375–1377. (doi:10.1038/ng1914)
- 711 67. Tang T, Kumar S, Shen Y, Lu J, Wu M-L, Shi S, Li W-H, Wu C-I. 2010 Adverse  
712 interactions between micro-RNAs and target genes from different species. *Proc. Natl.*  
713 *Acad. Sci. U. S. A.* **107**, 12935–40. (doi:10.1073/pnas.1007591107)
- 714 68. Brady SG, Sipes S, Pearson A, Danforth BN. 2006 Recent and simultaneous origins of  
715 eusociality in halictid bees. *Proc. R. Soc. B Biol. Sci.* **273**, 1643–1649.  
716 (doi:10.1098/rspb.2006.3496)
- 717 69. Smith AR, Kapheim KM, O'Donnell S, Wcislo WT. 2009 Social competition but not  
718 subfertility leads to a division of labour in the facultatively social sweat bee *Megalopta*  
719 *genalis* (Hymenoptera: Halictidae). *Anim. Behav.* **78**, 1043–1050.
- 720 70. Patel VD, Capra JA. 2017 Ancient human miRNAs are more likely to have broad  
721 functions and disease associations than young miRNAs. *BMC Genomics* **18**, 672.  
722 (doi:10.1186/s12864-017-4073-z)
- 723 71. Roux J, González-Porta M, Robinson-Rechavi M. 2012 Comparative analysis of human  
724 and mouse expression data illuminates tissue-specific evolutionary patterns of miRNAs.

- 725        *Nucleic Acids Res.* **40**, 5890–5900. (doi:10.1093/nar/gks279)
- 726    72.    Patalano S *et al.* 2015 Molecular signatures of plastic phenotypes in two eusocial insect  
727        species with simple societies. *Proc. Natl. Acad. Sci.* **112**, 13970–13975.  
728        (doi:10.1073/pnas.1515937112)
- 729    73.    Wu C-I, Shen Y, Tang T. 2009 Evolution under canalization and the dual roles of  
730        microRNAs: a hypothesis. *Genome Res.* **19**, 734–43. (doi:10.1101/gr.084640.108)
- 731    74.    Hornstein E, Shomron N. 2006 Canalization of development by microRNAs. *Nat. Genet.*  
732        **38**, S20–S24. (doi:10.1038/ng1803)
- 733    75.    Peterson KJ, Dietrich MR, McPeck MA. 2009 MicroRNAs and metazoan macroevolution:  
734        insights into canalization, complexity, and the Cambrian explosion. *BioEssays* **31**, 736–  
735        747. (doi:10.1002/bies.200900033)
- 736    76.    Chen K, Rajewsky N. 2006 Natural selection on human microRNA binding sites inferred  
737        from SNP data. *Nat. Genet.* **38**, 1452–1456. (doi:10.1038/ng1910)
- 738    77.    Saunders MA, Liang H, Li W-H. 2007 Human polymorphism at microRNAs and  
739        microRNA target sites. *Proc. Natl. Acad. Sci. U. S. A.* **104**, 3300–5.  
740        (doi:10.1073/pnas.0611347104)
- 741    78.    Franchini P, Xiong P, Fruciano C, Meyer A. 2016 The role of microRNAs in the repeated  
742        parallel diversification of lineages of midas cichlid fish from Nicaragua. *Genome Biol.*  
743        *Evol.* **8**, 1543–1555. (doi:10.1093/gbe/evw097)
- 744    79.    Maynard Smith J, Szathmáry E. 1995 *The major transitions in evolution*. Oxford,  
745        England: Oxford University Press.

746

747 **DATA AVAILABILITY**

748 Sequences are deposited at NCBI SRA as BioProject PRJNA559906. Code is available upon  
749 request.

750

751 **ACKNOWLEDGEMENTS**

752 This work was supported by the USDA National Institute of Food and Agriculture [2018-67014-  
753 27542 to K.M.K.]; the Utah Agricultural Experiment Station, Utah State University [Project  
754 1297, journal paper number 9239 to K.M.K.]; the U.S.-Israel Binational Science Foundation  
755 [BSF 2012807 to G.B. and Y.B.S.]; and the Swiss National Science Foundation  
756 [PP00P3\_170664 to R. M. W.]. G.B. thanks the Clark Way Harrison Visiting Professor in Arts  
757 and Sciences that supported his stay in Washington University in St. Louis. Sequencing was  
758 performed at the University of Illinois Roy J. Carver Biotechnology Center. We thank the  
759 University of Utah High Performance Computing Center for computational time and assistance.  
760 Illustrations were created by J. Johnson (LifeSciences Studios). We thank G. Robinson for  
761 helpful feedback on an earlier draft of this manuscript.

762

763 **AUTHOR CONTRIBUTIONS**

764 K.M.K. conceived of the study and designed the experiments. K.M.K., E.S., G.B., and Y.B-S.  
765 collected the data. K.M.K., B.M.J., E.S., and R.M.W. analyzed the data. K.M.K. wrote the initial  
766 draft of the manuscript. All authors edited and approved the article for publication.
