# Supplementary material for: Brain microRNAs among social and solitary bees
Source: bioRxiv preprint, doi:10.1101/730317, version 4 (2020-03-31)
Supplement: Table S8 [file 730317_file08.xlsx]

## Sheet: Metadata
This file contains lists of lineage-specific miRNAs and their putative target genes. There is a separate tab for each species. The column headers are described below and are the same for each tab.
Column	Description
miR_ID	This is the miRNA provisional ID
Target_gene_ID	Gene ID of the putative target
Orthogroup_age	Age of the target gene
Orthogroup_ID	Orthogroup (v9) ID for the target gene

## Sheet: amel_lin_spec_targets
miR_ID	Target_gene_ID	Orthogroup_age	Orthogroup_ID
Group10.26_1831	GB42167	Hymenoptera	EOG091G02HH
Group10.26_1831	GB42227	Vertebrata	EOG091G0S4E
Group10.26_1831	GB42304	Vertebrata	EOG091G0A9D
Group10.26_1831	GB43675	Unique
Group10.26_1831	GB44315	Vertebrata	EOG091G02LZ
Group10.26_1831	GB44390	Unique
Group10.26_1831	GB47319	Vertebrata	EOG091G0GV9
Group10.26_1831	GB48192	Vertebrata	EOG091G17TS
Group10.26_1831	GB50425	Vertebrata	EOG091G0WNB
Group10.26_1831	GB50586	Vertebrata	EOG091G0DF7
Group10.26_1831	GB51612	Arthropoda	EOG091G0JZ8
Group10.26_1831	GB51842	Holometabola	EOG091G045F
Group10.26_1831	GB55755	Vertebrata	EOG091G17TS
Group10.28_2099	GB40975	Vertebrata	EOG091G0805
Group10.28_2099	GB41706	Unique
Group10.28_2099	GB41734	Vertebrata	EOG091G017H
Group10.28_2099	GB41947	Unique
Group10.28_2099	GB43094	Vertebrata	EOG091G03E1
Group10.28_2099	GB43650	Unique
Group10.28_2099	GB43712	Vertebrata	EOG091G0KJ0
Group10.28_2099	GB47767	Vertebrata	EOG091G0I6K
Group10.28_2099	GB48217	Hymenoptera	EOG091G0R6I
Group10.28_2099	GB51969	Unique
Group10.28_2099	GB52943	Unique
Group10.28_2099	GB55402	Unique
Group11.18_2379	GB49561	Unique
Group11.18_2379	GB54998	Vertebrata	EOG091G00WO
Group11.18_2557	GB43199	Unique
Group11.18_2557	GB49846	Apoidea	EOG091G0SHX
Group11.18_2557	GB52708	Vertebrata	EOG091G0364
Group11.18_2557	GB54467	Vertebrata	EOG091G0BI0
Group13.4_3802	GB41457	Unique
Group13.4_3802	GB48604	Vertebrata	EOG091G0E2C
Group1.36_978	GB41503	Unique
Group1.36_978	GB48961	Vertebrata	EOG091G0DMQ
Group1.36_978	GB52522	Unique
Group14.3_4428	GB40933	Vertebrata	EOG091G00FO
Group14.3_4428	GB41466	Vertebrata	EOG091G0N7M
Group14.3_4428	GB41724	Vertebrata	EOG091G0LMZ
Group14.3_4428	GB41728	Apoidea	EOG091G1MF5
Group14.3_4428	GB41752	Unique
Group14.3_4428	GB42993	Unique
Group14.3_4428	GB43019	Unique
Group14.3_4428	GB45162	Unique
Group14.3_4428	GB46316	Unique
Group14.3_4428	GB47946	Vertebrata	EOG091G005W
Group14.3_4428	GB48441	Unique
Group14.3_4428	GB48608	Vertebrata	EOG091G181Y
Group14.3_4428	GB49962	Vertebrata	EOG091G04OW
Group14.3_4428	GB50426	Vertebrata	EOG091G0WNB
Group14.3_4428	GB51749	Vertebrata	EOG091G0AEI
Group14.3_4428	GB53796	Hymenoptera	EOG091G0BPJ
Group14.3_4428	GB55194	Unique
Group14.3_4428	GB55248	Unique
Group14.3_4428	GB55287	Vertebrata	EOG091G021M
Group14.3_4428	GB55387	Vertebrata	EOG091G0KKW
Group15.19_4912	GB41464	Vertebrata	EOG091G08WX
Group15.19_4912	GB41853	Unique
Group15.19_4912	GB44441	Unique
Group15.19_4912	GB45010	Metazoa	EOG091G0YCP
Group15.19_4912	GB45101	Vertebrata	EOG091G009V
Group15.19_4912	GB45715	Vertebrata	EOG091G0I8R
Group15.19_4912	GB47764	Vertebrata	EOG091G0BO8
Group15.19_4912	GB48258	Insecta	EOG091G0B7O
Group15.19_4912	GB49753	Vertebrata	EOG091G03VC
Group15.19_4912	GB50048	Vertebrata	EOG091G0N6A
Group15.19_4912	GB50793	Hymenoptera	EOG091G13HM
Group15.19_5013	GB40960	Metazoa	EOG091G0LXY
Group15.19_5013	GB42035	Vertebrata	EOG091G00DE
Group15.19_5013	GB48862	Holometabola	EOG091G0PMG
Group16.2_5390	GB42442	Vertebrata	EOG091G02CU
Group16.2_5390	GB42547	Apoidea	EOG091G1CFA
Group16.2_5390	GB45538	Vertebrata	EOG091G0ALL
Group16.2_5390	GB46072	Unique
Group16.2_5390	GB46779	Unique
Group16.2_5390	GB48229	Vertebrata	EOG091G0HN3
Group16.2_5390	GB50672	Vertebrata	EOG091G0F24
Group16.2_5390	GB52918	Vertebrata	EOG091G0LXR
Group16.2_5390	GB53521	Apoidea	EOG091G109V
Group16.2_5390	GB53638	Unique
Group2.11_5688	GB49962	Vertebrata	EOG091G04OW
Group2.11_5688	GB51310	Apoidea	EOG091G1VD2
Group2.11_5688	GB55884	Unique
Group2.11_5690	GB41282	Vertebrata	EOG091G0125
Group2.11_5690	GB42621	Hymenoptera	EOG091G08JH
Group2.11_5690	GB43602	Vertebrata	EOG091G05ZV
Group2.11_5690	GB44204	Metazoa	EOG091G0J8Q
Group2.11_5690	GB46574	Unique
Group2.11_5690	GB47425	Vertebrata	EOG091G03AV
Group2.11_5690	GB48140	Vertebrata	EOG091G00A2
Group2.11_5690	GB48603	Metazoa	EOG091G0SEV
Group2.11_5690	GB49799	Vertebrata	EOG091G07YG
Group2.11_5690	GB52100	Metazoa	EOG091G0B4H
Group2.11_5690	GB53396	Vertebrata	EOG091G02V2
Group2.11_5690	GB54527	Unique
Group2.11_5690	GB55724	Vertebrata	EOG091G0L8N
Group3.7_7148	GB51376	Vertebrata	EOG091G06VI
Group5.11_8294	GB40663	Vertebrata	EOG091G0LKW
Group5.11_8294	GB40991	Unique
Group5.11_8294	GB44019	Vertebrata	EOG091G0MPE
Group5.11_8294	GB47056	Holometabola	EOG091G1TGR
Group5.11_8294	GB48392	Unique
Group5.11_8294	GB48394	Unique
Group5.11_8294	GB50117	Vertebrata	EOG091G054P
Group5.11_8294	GB50794	Unique
Group5.11_8294	GB51905	Aculeata	EOG091G1AJ3
Group5.11_8294	GB53253	Vertebrata	EOG091G0EXT
Group5.11_8294	GB55797	Vertebrata	EOG091G0DF0
Group5.14_8630	GB40532	Unique
Group5.14_8630	GB41725	Vertebrata	EOG091G0TSZ
Group5.14_8630	GB47288	Unique
Group5.14_8630	GB50544	Vertebrata	EOG091G0Y4N
Group5.14_8630	GB50570	Insecta	EOG091G11WS
Group5.14_8630	GB50633	Vertebrata	EOG091G11T4
Group5.14_8630	GB53469	Vertebrata	EOG091G0V8G
Group5.9_8995	GB44352	Vertebrata	EOG091G0PWW
Group5.9_8995	GB46670	Unique
Group5.9_8995	GB48508	Unique
Group6.16_9347	GB42026	Aculeata	EOG091G18MT
Group6.16_9347	GB43857	Vertebrata	EOG091G01CP
Group7.12_10008	GB40162	Vertebrata	EOG091G0LHP
Group7.12_10008	GB42685	Vertebrata	EOG091G1270
Group7.12_10008	GB44022	Vertebrata	EOG091G0RM5
Group7.12_10008	GB44735	Insecta	EOG091G0544
Group7.12_10008	GB45849	Unique
Group7.12_10008	GB45931	Unique
Group7.12_10008	GB47781	Holometabola	EOG091G0KVX
Group7.12_10008	GB50277	Vertebrata	EOG091G0ROT
Group7.12_10008	GB51944	Unique
Group7.12_10008	GB52048	Unique
Group7.12_10008	GB53737	Metazoa	EOG091G01S0
Group7.12_10008	GB53782	Vertebrata	EOG091G136P
Group7.12_10008	GB54179	Vertebrata	EOG091G0LV6
Group7.12_10008	GB54305	Unique
Group8.21_10734	GB43626	Vertebrata	EOG091G0EXM
Group8.21_10734	GB46630	Insecta	EOG091G021C
Group8.21_10734	GB48426	Vertebrata	EOG091G0137
Group8.21_10734	GB51727	Vertebrata	EOG091G0BRP
Group8.21_10734	GB51766	Unique
Group8.21_10734	GB52633	Unique
Group8.21_10734	GB53007	Apoidea	EOG091G1SCL
Group8.21_10734	GB53088	Vertebrata	EOG091G05EF
Group8.21_10734	GB54528	Vertebrata	EOG091G0FQT
Group8.21_10734	GB55324	Vertebrata	EOG091G0OZ0
Group8.3_10826	GB40504	Vertebrata	EOG091G03JK
Group8.3_10826	GB40531	Metazoa	EOG091G05MT
Group8.3_10826	GB41372	Vertebrata	EOG091G050W
Group8.3_10826	GB41460	Unique
Group8.3_10826	GB41464	Vertebrata	EOG091G08WX
Group8.3_10826	GB41721	Vertebrata	EOG091G0UHT
Group8.3_10826	GB42044	Apoidea	EOG091G1CZH
Group8.3_10826	GB42069	Unique
Group8.3_10826	GB42224	Vertebrata	EOG091G05CB
Group8.3_10826	GB42576	Vertebrata	EOG091G0QR8
Group8.3_10826	GB42592	Vertebrata	EOG091G14DA
Group8.3_10826	GB42897	Vertebrata	EOG091G0MD1
Group8.3_10826	GB43497	Vertebrata	EOG091G0457
Group8.3_10826	GB43749	Unique
Group8.3_10826	GB44091	Vertebrata	EOG091G000Z
Group8.3_10826	GB47713	Unique
Group8.3_10826	GB47774	Unique
Group8.3_10826	GB48136	Vertebrata	EOG091G06XO
Group8.3_10826	GB48616	Unique
Group8.3_10826	GB49924	Arthropoda	EOG091G0984
Group8.3_10826	GB50155	Insecta	EOG091G1UB2
Group8.3_10826	GB50330	Apoidea	EOG091G1CWW
Group8.3_10826	GB50792	Unique
Group8.3_10826	GB50962	Vertebrata	EOG091G0U0S
Group8.3_10826	GB51310	Apoidea	EOG091G1VD2
Group8.3_10826	GB53353	Vertebrata	EOG091G00GE
Group8.3_10826	GB53356	Unique
Group8.3_10826	GB53784	Insecta	EOG091G0I1L
Group8.3_10826	GB54066	Unique
Group8.3_10826	GB54394	Unique
Group8.3_10826	GB54840	Unique
Group8.3_10826	GB55174	Unique
Group8.3_10826	GB55378	Vertebrata	EOG091G0HVA
Group8.3_10826	GB55489	Vertebrata	EOG091G0341
Group8.3_10826	GB55798	Vertebrata	EOG091G0OB3
Group9.7_11856	GB40012	Metazoa	EOG091G0GDW
Group9.7_11856	GB42342	Unique
Group9.7_11856	GB42955	Unique
Group9.7_11856	GB50070	Unique
Group9.7_11856	GB52133	Vertebrata	EOG091G1BN0
Group9.7_11856	GB53670	Vertebrata	EOG091G00TP
GroupUn6_12815	GB40002	Unique
GroupUn6_12815	GB40660	Unique
GroupUn6_12815	GB41057	Unique
GroupUn6_12815	GB42127	Unique
GroupUn6_12815	GB42513	Vertebrata	EOG091G0LVA
GroupUn6_12815	GB42530	Apoidea	EOG091G1VD2
GroupUn6_12815	GB43497	Vertebrata	EOG091G0457
GroupUn6_12815	GB43749	Unique
GroupUn6_12815	GB44563	Unique
GroupUn6_12815	GB45023	Vertebrata	EOG091G0Q3B
GroupUn6_12815	GB46782	Unique
GroupUn6_12815	GB47366	Insecta	EOG091G0MAQ
GroupUn6_12815	GB49924	Arthropoda	EOG091G0984
GroupUn6_12815	GB50452	Unique
GroupUn6_12815	GB50532	Vertebrata	EOG091G0SCQ
GroupUn6_12815	GB51216	Vertebrata	EOG091G0LVA
GroupUn6_12815	GB51310	Apoidea	EOG091G1VD2
GroupUn6_12815	GB51896	Apoidea	EOG091G1VD2
GroupUn6_12815	GB54029	Unique
GroupUn6_12815	GB54127	Vertebrata	EOG091G024C
GroupUn6_12815	GB55586	Metazoa	EOG091G04FD
GroupUn6_12815	GB55855	Vertebrata	EOG091G05X6
GroupUn6_12827	GB47313	Vertebrata	EOG091G033A
GroupUn6_12827	GB49252	Vertebrata	EOG091G0BZZ
GroupUn6_12827	GB51657	Vertebrata	EOG091G0CIQ
GroupUn6_12827	GB52558	Vertebrata	EOG091G130P
GroupUn6_12827	GB55363	Metazoa	EOG091G0CFI
GroupUn6_12838	GB40069	Vertebrata	EOG091G0QR8
GroupUn6_12838	GB48811	Vertebrata	EOG091G04U3
GroupUn6_12838	GB53534	Unique

## Sheet: bimp_lin_spec_targets
miR_ID	Target_gene_ID	Orthogroup_age	Orthogroup_ID
scf_0010_142	BIMP10198	Vertebrata	EOG091G0JNC
scf_0010_142	BIMP11498	Vertebrata	EOG091G0W4U
scf_0010_142	BIMP11707	Insecta	EOG091G11DQ
scf_0010_142	BIMP12061	Vertebrata	EOG091G0ZEP
scf_0010_142	BIMP12680	Arthropoda	EOG091G1SNZ
scf_0010_142	BIMP12738	Unique
scf_0010_142	BIMP12750	Vertebrata	EOG091G0JQC
scf_0010_142	BIMP13239	Vertebrata	EOG091G0FQT
scf_0010_142	BIMP15870	Hymenoptera	EOG091G0LR7
scf_0010_142	BIMP17891	Vertebrata	EOG091G0NH9
scf_0010_142	BIMP17992	Vertebrata	EOG091G0OPC
scf_0010_142	BIMP18715	Vertebrata	EOG091G0XFM
scf_0010_142	BIMP19326	Aculeata	EOG091G0ZST
scf_0010_142	BIMP23436	Metazoa	EOG091G0XSU
scf_0010_142	BIMP23822	Vertebrata	EOG091G003K
scf_0010_142	BIMP24037	Vertebrata	EOG091G0MUU
scf_0010_142	BIMP24556	Vertebrata	EOG091G04HR
scf_0010_142	BIMP24690	Vertebrata	EOG091G0C7P
scf_0019_1222	BIMP10080	Vertebrata	EOG091G0AUR
scf_0019_1222	BIMP10305	Unique
scf_0019_1222	BIMP10827	Vertebrata	EOG091G0W4U
scf_0019_1222	BIMP10828	Vertebrata	EOG091G0IW9
scf_0019_1222	BIMP10841	Unique
scf_0019_1222	BIMP11346	Vertebrata	EOG091G0U5E
scf_0019_1222	BIMP11765	Vertebrata	EOG091G0OPC
scf_0019_1222	BIMP11915	Metazoa	EOG091G0453
scf_0019_1222	BIMP12596	Vertebrata	EOG091G0LVA
scf_0019_1222	BIMP13160	Vertebrata	EOG091G079T
scf_0019_1222	BIMP13183	Vertebrata	EOG091G0U5E
scf_0019_1222	BIMP13257	Vertebrata	EOG091G00HL
scf_0019_1222	BIMP14127	Vertebrata	EOG091G1YNO
scf_0019_1222	BIMP14551	Vertebrata	EOG091G0W4U
scf_0019_1222	BIMP14594	Holometabola	EOG091G1YIA
scf_0019_1222	BIMP14628	Metazoa	EOG091G0SGW
scf_0019_1222	BIMP15023	Arthropoda	EOG091G16T9
scf_0019_1222	BIMP15315	Unique
scf_0019_1222	BIMP15346	Vertebrata	EOG091G0YX6
scf_0019_1222	BIMP15393	Vertebrata	EOG091G0MUU
scf_0019_1222	BIMP15870	Hymenoptera	EOG091G0LR7
scf_0019_1222	BIMP15883	Vertebrata	EOG091G08YA
scf_0019_1222	BIMP16241	Unique
scf_0019_1222	BIMP16541	Vertebrata	EOG091G03HU
scf_0019_1222	BIMP16968	Vertebrata	EOG091G03VC
scf_0019_1222	BIMP17064	Vertebrata	EOG091G0YWP
scf_0019_1222	BIMP17070	Vertebrata	EOG091G1CMQ
scf_0019_1222	BIMP18245	Vertebrata	EOG091G144P
scf_0019_1222	BIMP19010	Vertebrata	EOG091G1CT8
scf_0019_1222	BIMP19264	Vertebrata	EOG091G04OW
scf_0019_1222	BIMP19272	Vertebrata	EOG091G01DP
scf_0019_1222	BIMP19279	Vertebrata	EOG091G08XV
scf_0019_1222	BIMP19864	Metazoa	EOG091G1L7N
scf_0019_1222	BIMP19881	Vertebrata	EOG091G0IW9
scf_0019_1222	BIMP19893	Arthropoda	EOG091G0VQ6
scf_0019_1222	BIMP20378	Hymenoptera	EOG091G0NCP
scf_0019_1222	BIMP20576	Vertebrata	EOG091G09XD
scf_0019_1222	BIMP20692	Vertebrata	EOG091G0W4U
scf_0019_1222	BIMP21008	Vertebrata	EOG091G0H46
scf_0019_1222	BIMP21814	Vertebrata	EOG091G0YWP
scf_0019_1222	BIMP22294	Hymenoptera	EOG091G0RBI
scf_0019_1222	BIMP22770	Vertebrata	EOG091G04OW
scf_0019_1222	BIMP22804	Metazoa	EOG091G0TBJ
scf_0019_1222	BIMP23394	Insecta	EOG091G0QBW
scf_0019_1222	BIMP24402	Vertebrata	EOG091G1CPI
scf_0019_1222	BIMP25165	Apoidea	EOG091G1PFW
scf_0019_1222	BIMP25200	Vertebrata	EOG091G0Y4N
scf_0019_1222	BIMP25262	Vertebrata	EOG091G0QSB
scf_0019_1222	BIMP25450	Vertebrata	EOG091G0MUU
scf_0019_1222	BIMP25795	Hymenoptera	EOG091G06XC
scf_0019_1222	BIMP25812	Vertebrata	EOG091G0RN5
scf_0019_1222	BIMP25831	Vertebrata	EOG091G13SM
scf_0080_4449	BIMP11312	Vertebrata	EOG091G050W
scf_0080_4449	BIMP14039	Vertebrata	EOG091G0MW4
scf_0080_4449	BIMP14379	Vertebrata	EOG091G0MH6
scf_0080_4449	BIMP17192	Arthropoda	EOG091G016G
scf_0080_4449	BIMP18015	Vertebrata	EOG091G0MUU
scf_0080_4449	BIMP18168	Unique
scf_0080_4449	BIMP23393	Unique
scf_0080_4449	BIMP25675	Vertebrata	EOG091G014W
scf_0091_4899	BIMP25183	Vertebrata	EOG091G0N6V
scf_0091_4947	BIMP19916	Vertebrata	EOG091G0LVA
scf_0091_4947	BIMP20063	Hymenoptera	EOG091G0T9F
scf_0091_4947	BIMP24885	Vertebrata	EOG091G1CT8
scf_0096_5333	BIMP10356	Unique
scf_0096_5333	BIMP11294	Vertebrata	EOG091G0IW9
scf_0096_5333	BIMP11517	Unique
scf_0096_5333	BIMP12796	Hymenoptera	EOG091G1OPH
scf_0096_5333	BIMP12868	Insecta	EOG091G1YAO
scf_0096_5333	BIMP14243	Metazoa	EOG091G0J8G
scf_0096_5333	BIMP14494	Vertebrata	EOG091G1CT8
scf_0096_5333	BIMP16005	Vertebrata	EOG091G0MUU
scf_0096_5333	BIMP16119	Insecta	EOG091G04T9
scf_0096_5333	BIMP16839	Apoidea	EOG091G1NLN
scf_0096_5333	BIMP18439	Metazoa	EOG091G0SG7
scf_0096_5333	BIMP22501	Unique
scf_0096_5333	BIMP22819	Unique
scf_0096_5333	BIMP23223	Vertebrata	EOG091G0YWP
scf_0096_5333	BIMP23387	Vertebrata	EOG091G0YWP
scf_0096_5333	BIMP24041	Vertebrata	EOG091G0OPC
scf_0096_5333	BIMP25014	Vertebrata	EOG091G15W0
scf_0096_5333	BIMP25671	Vertebrata	EOG091G1OTB
scf_0102_5937	BIMP10723	Vertebrata	EOG091G08VG
scf_0102_5937	BIMP15935	Vertebrata	EOG091G0RMA
scf_0102_5937	BIMP16039	Unique
scf_0102_5937	BIMP16224	Hymenoptera	EOG091G147U
scf_0102_5937	BIMP19090	Vertebrata	EOG091G0YWP
scf_0102_5937	BIMP21074	Apoidea	EOG091G1SUN
scf_0102_5937	BIMP22626	Vertebrata	EOG091G1CT8
scf_0113_6501	BIMP20740	Vertebrata	EOG091G0TI1
scf_0120_6786	BIMP10155	Vertebrata	EOG091G08EC
scf_0120_6786	BIMP11548	Vertebrata	EOG091G13M7
scf_0120_6786	BIMP14221	Metazoa	EOG091G140U
scf_0120_6786	BIMP20607	Vertebrata	EOG091G0P6B
scf_0133_7760	BIMP17025	Vertebrata	EOG091G0J9X
scf_0133_7760	BIMP18451	Vertebrata	EOG091G0K9M
scf_0133_7760	BIMP24114	Vertebrata	EOG091G02LN
scf_0133_7830	BIMP10983	Vertebrata	EOG091G0Y4N
scf_0133_7830	BIMP13085	Hymenoptera	EOG091G03AW
scf_0133_7830	BIMP13761	Vertebrata	EOG091G01FG
scf_0133_7830	BIMP13877	Vertebrata	EOG091G08MX
scf_0133_7830	BIMP14918	Metazoa	EOG091G0DUJ
scf_0133_7830	BIMP15278	Vertebrata	EOG091G02HR
scf_0133_7830	BIMP15474	Vertebrata	EOG091G14UY
scf_0133_7830	BIMP16557	Vertebrata	EOG091G09AX
scf_0133_7830	BIMP16931	Unique
scf_0133_7830	BIMP17211	Hymenoptera	EOG091G123J
scf_0133_7830	BIMP18151	Vertebrata	EOG091G0Y4N
scf_0133_7830	BIMP18444	Hymenoptera	EOG091G0N25
scf_0133_7830	BIMP19061	Vertebrata	EOG091G0MUU
scf_0133_7830	BIMP20174	Vertebrata	EOG091G0Y4N
scf_0133_7830	BIMP20177	Metazoa	EOG091G0D29
scf_0133_7830	BIMP20284	Vertebrata	EOG091G0Y4N
scf_0133_7830	BIMP20459	Vertebrata	EOG091G00E0
scf_0133_7830	BIMP20959	Vertebrata	EOG091G0DZH
scf_0133_7830	BIMP21216	Unique
scf_0133_7830	BIMP22373	Vertebrata	EOG091G0Y4N
scf_0133_7830	BIMP24059	Vertebrata	EOG091G0I39
scf_0133_7830	BIMP24087	Vertebrata	EOG091G1CT8
scf_0133_7830	BIMP25406	Insecta	EOG091G17JM
scf_0135_7970	BIMP10093	Vertebrata	EOG091G0FQT
scf_0135_7970	BIMP10465	Vertebrata	EOG091G12M3
scf_0135_7970	BIMP10755	Vertebrata	EOG091G07A0
scf_0135_7970	BIMP10956	Metazoa	EOG091G1AV5
scf_0135_7970	BIMP13085	Hymenoptera	EOG091G03AW
scf_0135_7970	BIMP13417	Metazoa	EOG091G1VVN
scf_0135_7970	BIMP13761	Vertebrata	EOG091G01FG
scf_0135_7970	BIMP15213	Vertebrata	EOG091G02KC
scf_0135_7970	BIMP15952	Vertebrata	EOG091G0SCQ
scf_0135_7970	BIMP17044	Hymenoptera	EOG091G07ZT
scf_0135_7970	BIMP18444	Hymenoptera	EOG091G0N25
scf_0135_7970	BIMP18755	Unique
scf_0135_7970	BIMP20177	Metazoa	EOG091G0D29
scf_0135_7970	BIMP20459	Vertebrata	EOG091G00E0
scf_0135_7970	BIMP20935	Holometabola	EOG091G02EI
scf_0135_7970	BIMP21206	Vertebrata	EOG091G037O
scf_0135_7970	BIMP21606	Metazoa	EOG091G1AV5
scf_0135_7970	BIMP23067	Vertebrata	EOG091G0A6V
scf_0135_7970	BIMP24059	Vertebrata	EOG091G0I39
scf_0136_8265	BIMP10006	Vertebrata	EOG091G09O3
scf_0136_8265	BIMP10874	Vertebrata	EOG091G0MUU
scf_0136_8265	BIMP11602	Vertebrata	EOG091G02KC
scf_0136_8265	BIMP11903	Vertebrata	EOG091G03N1
scf_0136_8265	BIMP12051	Vertebrata	EOG091G0SPY
scf_0136_8265	BIMP12083	Vertebrata	EOG091G07JV
scf_0136_8265	BIMP12640	Unique
scf_0136_8265	BIMP13021	Vertebrata	EOG091G09OH
scf_0136_8265	BIMP13647	Vertebrata	EOG091G01JA
scf_0136_8265	BIMP15810	Vertebrata	EOG091G0MUU
scf_0136_8265	BIMP17021	Vertebrata	EOG091G0LKW
scf_0136_8265	BIMP17041	Vertebrata	EOG091G09OH
scf_0136_8265	BIMP17109	Vertebrata	EOG091G018M
scf_0136_8265	BIMP17702	Vertebrata	EOG091G00Q4
scf_0136_8265	BIMP18926	Vertebrata	EOG091G05YN
scf_0136_8265	BIMP19487	Vertebrata	EOG091G05BB
scf_0136_8265	BIMP20594	Vertebrata	EOG091G05AE
scf_0136_8265	BIMP20698	Vertebrata	EOG091G0MXE
scf_0136_8265	BIMP21261	Unique
scf_0136_8265	BIMP21262	Unique
scf_0136_8265	BIMP21264	Vertebrata	EOG091G016P
scf_0136_8265	BIMP21521	Vertebrata	EOG091G1B03
scf_0136_8265	BIMP22794	Arthropoda	EOG091G0UMW
scf_0136_8265	BIMP23055	Vertebrata	EOG091G01TR
scf_0136_8265	BIMP23692	Unique
scf_0136_8265	BIMP24620	Metazoa	EOG091G1H7K
scf_0136_8265	BIMP25663	Unique
scf_0136_8265	BIMP25706	Metazoa	EOG091G0H4M
scf_0144_9155	BIMP10051	Vertebrata	EOG091G076X
scf_0144_9155	BIMP11819	Vertebrata	EOG091G019B
scf_0144_9155	BIMP12728	Vertebrata	EOG091G04Q3
scf_0144_9155	BIMP14067	Vertebrata	EOG091G0CV5
scf_0144_9155	BIMP14628	Metazoa	EOG091G0SGW
scf_0144_9155	BIMP14787	Metazoa	EOG091G02I3
scf_0144_9155	BIMP16318	Unique
scf_0144_9155	BIMP17037	Arthropoda	EOG091G1UXX
scf_0144_9155	BIMP18080	Unique
scf_0144_9155	BIMP18182	Vertebrata	EOG091G1CT8
scf_0144_9155	BIMP18184	Unique
scf_0144_9155	BIMP18236	Vertebrata	EOG091G014U
scf_0144_9155	BIMP19875	Vertebrata	EOG091G0IW9
scf_0144_9155	BIMP19920	Vertebrata	EOG091G1CT8
scf_0144_9155	BIMP20223	Vertebrata	EOG091G0LYV
scf_0144_9155	BIMP21814	Vertebrata	EOG091G0YWP
scf_0144_9155	BIMP23048	Vertebrata	EOG091G0OFF
scf_0144_9155	BIMP23595	Vertebrata	EOG091G0KJA
scf_0144_9155	BIMP24946	Vertebrata	EOG091G0OKI
scf_0144_9155	BIMP25282	Vertebrata	EOG091G14DP
scf_0144_9155	BIMP25801	Vertebrata	EOG091G0TKO
scf_0151_9578	BIMP19542	Vertebrata	EOG091G10ZQ
scf_0203_10986	BIMP22102	Vertebrata	EOG091G0YN0
scf_0203_11022	BIMP12707	Vertebrata	EOG091G0M5C
scf_0203_11022	BIMP15701	Vertebrata	EOG091G0DF7
scf_0203_11022	BIMP15735	Metazoa	EOG091G0TV4
scf_0203_11022	BIMP18728	Vertebrata	EOG091G0X7D
scf_0203_11022	BIMP18772	Vertebrata	EOG091G16AI
scf_0203_11022	BIMP22073	Vertebrata	EOG091G06A1
scf_0203_11022	BIMP22424	Unique
scf_0203_11022	BIMP22437	Vertebrata	EOG091G0AUX
scf_0203_11022	BIMP23853	Vertebrata	EOG091G1CT8
scf_0203_11022	BIMP24174	Vertebrata	EOG091G0KGM
scf_0203_11097	BIMP11953	Vertebrata	EOG091G141O
scf_0232_12751	BIMP11517	Unique
scf_0232_12751	BIMP12142	Insecta	EOG091G03CS
scf_0232_12751	BIMP13786	Vertebrata	EOG091G01CU
scf_0232_12751	BIMP14010	Metazoa	EOG091G0NCA
scf_0232_12751	BIMP14799	Unique
scf_0232_12751	BIMP16782	Unique
scf_0232_12751	BIMP18413	Vertebrata	EOG091G02L1
scf_0232_12751	BIMP19973	Metazoa	EOG091G03O4
scf_0232_12751	BIMP21298	Vertebrata	EOG091G058I
scf_0232_12751	BIMP21814	Vertebrata	EOG091G0YWP
scf_0232_12751	BIMP24113	Hymenoptera	EOG091G0LCH
scf_0232_12751	BIMP24677	Unique
scf_0232_12751	BIMP24804	Vertebrata	EOG091G0GWF
scf_0233_12842	BIMP10398	Vertebrata	EOG091G0AV3
scf_0233_12842	BIMP11656	Vertebrata	EOG091G0EKJ
scf_0233_12842	BIMP11894	Vertebrata	EOG091G0UNU
scf_0233_12842	BIMP11898	Vertebrata	EOG091G0MUU
scf_0233_12842	BIMP14334	Unique
scf_0233_12842	BIMP15711	Aculeata	EOG091G17GC
scf_0233_12842	BIMP16013	Vertebrata	EOG091G0MUU
scf_0233_12842	BIMP16291	Vertebrata	EOG091G11T4
scf_0233_12842	BIMP17340	Vertebrata	EOG091G1CT8
scf_0233_12842	BIMP20062	Vertebrata	EOG091G0BB1
scf_0233_12842	BIMP20754	Unique
scf_0233_12842	BIMP21426	Vertebrata	EOG091G0LTS
scf_0263_13868	BIMP24872	Unique
scf_0320_15678	BIMP10154	Vertebrata	EOG091G01J6
scf_0320_15678	BIMP11451	Vertebrata	EOG091G00LU
scf_0320_15678	BIMP12625	Vertebrata	EOG091G0MUU
scf_0320_15678	BIMP13401	Vertebrata	EOG091G0PR3
scf_0320_15678	BIMP14964	Vertebrata	EOG091G021J
scf_0320_15678	BIMP14990	Arthropoda	EOG091G13UM
scf_0320_15678	BIMP15969	Vertebrata	EOG091G0LVC
scf_0320_15678	BIMP18023	Vertebrata	EOG091G1CT8
scf_0320_15678	BIMP18187	Unique
scf_0320_15678	BIMP19631	Hymenoptera	EOG091G18SZ
scf_0320_15678	BIMP22007	Vertebrata	EOG091G01IH
scf_0320_15678	BIMP22526	Unique
scf_0320_15678	BIMP25033	Vertebrata	EOG091G0LVA
scf_0361_16762	BIMP10080	Vertebrata	EOG091G0AUR
scf_0361_16762	BIMP10722	Vertebrata	EOG091G0YEL
scf_0361_16762	BIMP12531	Vertebrata	EOG091G01GH
scf_0361_16762	BIMP21467	Vertebrata	EOG091G0AZQ
scf_0361_16762	BIMP22573	Apoidea	EOG091G0SN1
scf_0417_18519	BIMP11122	Vertebrata	EOG091G12NS
scf_0417_18519	BIMP12937	Vertebrata	EOG091G0IKF
scf_0417_18519	BIMP14111	Hymenoptera	EOG091G0FT5
scf_0417_18519	BIMP14698	Vertebrata	EOG091G14DP
scf_0417_18519	BIMP14960	Vertebrata	EOG091G0TZX
scf_0417_18519	BIMP17503	Holometabola	EOG091G09A6
scf_0417_18519	BIMP17737	Holometabola	EOG091G0B83
scf_0417_18519	BIMP21773	Vertebrata	EOG091G1CT8
scf_0417_18519	BIMP21898	Metazoa	EOG091G0YCP
scf_0417_18519	BIMP22195	Vertebrata	EOG091G0FKS
scf_0417_18519	BIMP22371	Vertebrata	EOG091G0UNU
scf_0418_18748	BIMP10252	Vertebrata	EOG091G135G
scf_0418_18748	BIMP10830	Vertebrata	EOG091G0MUU
scf_0418_18748	BIMP12703	Vertebrata	EOG091G0YZ0
scf_0418_18748	BIMP14375	Vertebrata	EOG091G0G9L
scf_0418_18748	BIMP14680	Vertebrata	EOG091G0CH0
scf_0418_18748	BIMP14686	Unique
scf_0418_18748	BIMP15528	Vertebrata	EOG091G136P
scf_0418_18748	BIMP16241	Unique
scf_0418_18748	BIMP16508	Vertebrata	EOG091G03Z1
scf_0418_18748	BIMP17645	Unique
scf_0418_18748	BIMP19155	Unique
scf_0418_18748	BIMP19260	Vertebrata	EOG091G039A
scf_0418_18748	BIMP19673	Vertebrata	EOG091G01IL
scf_0418_18748	BIMP20512	Unique
scf_0418_18748	BIMP20674	Metazoa	EOG091G05GU
scf_0418_18748	BIMP21303	Metazoa	EOG091G0J8Q
scf_0418_18748	BIMP22719	Vertebrata	EOG091G0QST
scf_0418_18748	BIMP22836	Vertebrata	EOG091G0O1O
scf_0418_18748	BIMP23532	Metazoa	EOG091G0AJP
scf_0418_18748	BIMP23562	Vertebrata	EOG091G0BT8
scf_0418_18748	BIMP24528	Vertebrata	EOG091G0H7U
scf_0418_18748	BIMP25096	Apoidea	EOG091G1LX1
scf_0418_18748	BIMP25146	Vertebrata	EOG091G0UYL
scf_0418_18748	BIMP25680	Vertebrata	EOG091G0AUR
scf_0418_18748	BIMP25689	Vertebrata	EOG091G0VKY
scf_0442_19218	BIMP14444	Vertebrata	EOG091G065S
scf_0442_19218	BIMP14790	Apoidea	EOG091G1T2X
scf_0442_19218	BIMP22728	Aculeata	EOG091G0OGZ
scf_0442_19281	BIMP13868	Arthropoda	EOG091G0MH5
scf_0442_19281	BIMP16547	Vertebrata	EOG091G00UT
scf_0442_19281	BIMP19006	Vertebrata	EOG091G0NJ6
scf_0442_19281	BIMP20217	Vertebrata	EOG091G0L4W
scf_0442_19281	BIMP21047	Vertebrata	EOG091G03FE
scf_0442_19281	BIMP21590	Metazoa	EOG091G0LXP
scf_0501_21005	BIMP12869	Vertebrata	EOG091G0IW9
scf_0501_21005	BIMP14241	Vertebrata	EOG091G0KMI
scf_0501_21005	BIMP15045	Vertebrata	EOG091G0PNM
scf_0501_21005	BIMP17025	Vertebrata	EOG091G0J9X
scf_0501_21005	BIMP18006	Vertebrata	EOG091G06VI
scf_0501_21005	BIMP20990	Vertebrata	EOG091G15EX
scf_0501_21005	BIMP25084	Vertebrata	EOG091G08CA
scf_0525_21488	BIMP10979	Vertebrata	EOG091G09OH
scf_0525_21488	BIMP10980	Unique
scf_0525_21488	BIMP20969	Vertebrata	EOG091G0457
scf_0525_21488	BIMP21830	Vertebrata	EOG091G0I4G
scf_0543_22072	BIMP10866	Metazoa	EOG091G00H0
scf_0543_22072	BIMP12755	Vertebrata	EOG091G0BZP
scf_0543_22072	BIMP14459	Vertebrata	EOG091G0MN7
scf_0543_22072	BIMP18415	Vertebrata	EOG091G02L1
scf_0543_22072	BIMP18780	Vertebrata	EOG091G05AE
scf_0543_22072	BIMP19810	Vertebrata	EOG091G02UA
scf_0543_22072	BIMP22229	Vertebrata	EOG091G0K9K
scf_0543_22072	BIMP24754	Metazoa	EOG091G0NB4
scf_0582_23148	BIMP10983	Vertebrata	EOG091G0Y4N
scf_0582_23148	BIMP11192	Vertebrata	EOG091G0H46
scf_0582_23148	BIMP13085	Hymenoptera	EOG091G03AW
scf_0582_23148	BIMP13761	Vertebrata	EOG091G01FG
scf_0582_23148	BIMP13877	Vertebrata	EOG091G08MX
scf_0582_23148	BIMP14381	Unique
scf_0582_23148	BIMP15278	Vertebrata	EOG091G02HR
scf_0582_23148	BIMP15474	Vertebrata	EOG091G14UY
scf_0582_23148	BIMP16557	Vertebrata	EOG091G09AX
scf_0582_23148	BIMP16931	Unique
scf_0582_23148	BIMP17211	Hymenoptera	EOG091G123J
scf_0582_23148	BIMP18444	Hymenoptera	EOG091G0N25
scf_0582_23148	BIMP20177	Metazoa	EOG091G0D29
scf_0582_23148	BIMP20284	Vertebrata	EOG091G0Y4N
scf_0582_23148	BIMP20459	Vertebrata	EOG091G00E0
scf_0582_23148	BIMP21216	Unique
scf_0582_23148	BIMP21473	Vertebrata	EOG091G0Y4N
scf_0582_23148	BIMP22373	Vertebrata	EOG091G0Y4N
scf_0582_23148	BIMP24059	Vertebrata	EOG091G0I39
scf_0582_23148	BIMP25406	Insecta	EOG091G17JM
scf_0582_23317	BIMP15777	Vertebrata	EOG091G14DP
scf_0582_23317	BIMP20089	Unique
scf_0582_23317	BIMP21856	Vertebrata	EOG091G01SH
scf_0582_23317	BIMP25557	Vertebrata	EOG091G1CT8
scf_0637_24101	BIMP11627	Vertebrata	EOG091G0LVA
scf_0637_24101	BIMP12558	Vertebrata	EOG091G0IW9
scf_0637_24101	BIMP12905	Metazoa	EOG091G0G75
scf_0637_24101	BIMP15394	Unique
scf_0637_24101	BIMP17989	Unique
scf_0637_24101	BIMP19519	Vertebrata	EOG091G0CQ2
scf_0637_24101	BIMP19832	Vertebrata	EOG091G0GGD
scf_0637_24101	BIMP20983	Vertebrata	EOG091G0YEQ
scf_0637_24101	BIMP21654	Unique
scf_0637_24101	BIMP21666	Vertebrata	EOG091G09E6
scf_0637_24101	BIMP22098	Unique
scf_0670_25627	BIMP10104	Vertebrata	EOG091G1A6Q
scf_0670_25627	BIMP11752	Vertebrata	EOG091G17ZL
scf_0670_25627	BIMP11894	Vertebrata	EOG091G0UNU
scf_0670_25627	BIMP12916	Vertebrata	EOG091G0EKG
scf_0670_25627	BIMP14461	Vertebrata	EOG091G0E7H
scf_0670_25627	BIMP16711	Metazoa	EOG091G0FXC
scf_0670_25627	BIMP19061	Vertebrata	EOG091G0MUU
scf_0670_25627	BIMP19096	Vertebrata	EOG091G0S4E
scf_0670_25627	BIMP19252	Unique
scf_0670_25627	BIMP21357	Vertebrata	EOG091G0PBB
scf_0670_25627	BIMP23409	Unique
scf_0670_25627	BIMP24301	Vertebrata	EOG091G1CT8
scf_0670_25627	BIMP25219	Unique
scf_0733_26351	BIMP10830	Vertebrata	EOG091G0MUU
scf_0733_26351	BIMP11032	Vertebrata	EOG091G0067
scf_0733_26351	BIMP17715	Vertebrata	EOG091G1J41
scf_0733_26351	BIMP18089	Vertebrata	EOG091G0MUU
scf_0733_26351	BIMP20809	Vertebrata	EOG091G0MUU
scf_0733_26351	BIMP20966	Vertebrata	EOG091G1CT8
scf_0733_26351	BIMP23863	Vertebrata	EOG091G0JEI
scf_0733_26351	BIMP25456	Unique
scf_0761_26782	BIMP10187	Unique
scf_0761_26782	BIMP12118	Vertebrata	EOG091G026T
scf_0761_26782	BIMP19006	Vertebrata	EOG091G0NJ6
scf_0761_26782	BIMP22223	Vertebrata	EOG091G0OJZ
scf_0852_27786	BIMP10983	Vertebrata	EOG091G0Y4N
scf_0852_27786	BIMP13085	Hymenoptera	EOG091G03AW
scf_0852_27786	BIMP13877	Vertebrata	EOG091G08MX
scf_0852_27786	BIMP14381	Unique
scf_0852_27786	BIMP15474	Vertebrata	EOG091G14UY
scf_0852_27786	BIMP16557	Vertebrata	EOG091G09AX
scf_0852_27786	BIMP16931	Unique
scf_0852_27786	BIMP17211	Hymenoptera	EOG091G123J
scf_0852_27786	BIMP18444	Hymenoptera	EOG091G0N25
scf_0852_27786	BIMP19006	Vertebrata	EOG091G0NJ6
scf_0852_27786	BIMP20177	Metazoa	EOG091G0D29
scf_0852_27786	BIMP20284	Vertebrata	EOG091G0Y4N
scf_0852_27786	BIMP21216	Unique
scf_0852_27786	BIMP22373	Vertebrata	EOG091G0Y4N
scf_0852_27786	BIMP24059	Vertebrata	EOG091G0I39
scf_0852_27786	BIMP25406	Insecta	EOG091G17JM
scf_1275_31710	BIMP14411	Vertebrata	EOG091G0ZWE
scf_1275_31710	BIMP18207	Vertebrata	EOG091G09US
scf_1275_31710	BIMP24963	Vertebrata	EOG091G0MUU
scf_1506_33913	BIMP10044	Vertebrata	EOG091G1CT8
scf_1506_33913	BIMP10887	Vertebrata	EOG091G0MUU
scf_1506_33913	BIMP11053	Holometabola	EOG091G08LZ
scf_1506_33913	BIMP11631	Vertebrata	EOG091G0LQ1
scf_1506_33913	BIMP12285	Holometabola	EOG091G139V
scf_1506_33913	BIMP12475	Vertebrata	EOG091G1CT8
scf_1506_33913	BIMP12944	Unique
scf_1506_33913	BIMP13079	Vertebrata	EOG091G08LD
scf_1506_33913	BIMP14168	Hymenoptera	EOG091G0CCG
scf_1506_33913	BIMP16052	Vertebrata	EOG091G1CT8
scf_1506_33913	BIMP20581	Unique
scf_1506_33913	BIMP21584	Insecta	EOG091G009W
scf_1506_33913	BIMP21720	Vertebrata	EOG091G06S2
scf_1506_33913	BIMP24723	Vertebrata	EOG091G025V
scf_1553_34148	BIMP10299	Vertebrata	EOG091G0LB8
scf_1553_34148	BIMP10584	Vertebrata	EOG091G03VY
scf_1553_34148	BIMP10915	Holometabola	EOG091G0B9Q
scf_1553_34148	BIMP13176	Unique
scf_1553_34148	BIMP13714	Metazoa	EOG091G1978
scf_1553_34148	BIMP13853	Vertebrata	EOG091G0AO9
scf_1553_34148	BIMP15167	Vertebrata	EOG091G0MUU
scf_1553_34148	BIMP17200	Insecta	EOG091G15NA
scf_1553_34148	BIMP18694	Unique
scf_1553_34148	BIMP19354	Unique
scf_1553_34148	BIMP19752	Metazoa	EOG091G0D2J
scf_1553_34148	BIMP21122	Vertebrata	EOG091G04YE
scf_1553_34148	BIMP21388	Unique
scf_1553_34148	BIMP22503	Vertebrata	EOG091G0KKV
scf_1553_34148	BIMP24777	Unique
scf_1553_34148	BIMP24815	Insecta	EOG091G0CGS
scf_1553_34148	BIMP24852	Unique
scf_1553_34148	BIMP24901	Vertebrata	EOG091G0IPF
scf_2415_36126	BIMP11269	Vertebrata	EOG091G0PFO
scf_2415_36126	BIMP19349	Vertebrata	EOG091G0PQG
scf_2415_36126	BIMP19377	Metazoa	EOG091G08M8
scf_2415_36126	BIMP21387	Vertebrata	EOG091G12OH
scf_2415_36126	BIMP24713	Arthropoda	EOG091G0W16
scf_2415_36128	BIMP10449	Vertebrata	EOG091G0ZWR
scf_2415_36128	BIMP10484	Apoidea	EOG091G08C0
scf_2415_36128	BIMP10855	Metazoa	EOG091G0K8B
scf_2415_36128	BIMP10983	Vertebrata	EOG091G0Y4N
scf_2415_36128	BIMP11914	Vertebrata	EOG091G0X8F
scf_2415_36128	BIMP13085	Hymenoptera	EOG091G03AW
scf_2415_36128	BIMP14381	Unique
scf_2415_36128	BIMP15222	Vertebrata	EOG091G0ALL
scf_2415_36128	BIMP15531	Vertebrata	EOG091G0JUB
scf_2415_36128	BIMP15608	Insecta	EOG091G1IRA
scf_2415_36128	BIMP16557	Vertebrata	EOG091G09AX
scf_2415_36128	BIMP16893	Vertebrata	EOG091G0Y4N
scf_2415_36128	BIMP17211	Hymenoptera	EOG091G123J
scf_2415_36128	BIMP17563	Unique
scf_2415_36128	BIMP17716	Vertebrata	EOG091G0YWP
scf_2415_36128	BIMP17765	Vertebrata	EOG091G0HDJ
scf_2415_36128	BIMP17769	Vertebrata	EOG091G0SVP
scf_2415_36128	BIMP18444	Hymenoptera	EOG091G0N25
scf_2415_36128	BIMP18755	Unique
scf_2415_36128	BIMP18908	Vertebrata	EOG091G00OZ
scf_2415_36128	BIMP19006	Vertebrata	EOG091G0NJ6
scf_2415_36128	BIMP19037	Unique
scf_2415_36128	BIMP19046	Vertebrata	EOG091G1CT8
scf_2415_36128	BIMP20177	Metazoa	EOG091G0D29
scf_2415_36128	BIMP20403	Vertebrata	EOG091G0KOM
scf_2415_36128	BIMP21216	Unique
scf_2415_36128	BIMP21271	Vertebrata	EOG091G06U2
scf_2415_36128	BIMP21872	Vertebrata	EOG091G03BP
scf_2415_36128	BIMP22373	Vertebrata	EOG091G0Y4N
scf_2415_36128	BIMP22470	Unique
scf_2415_36128	BIMP22786	Vertebrata	EOG091G0Y4N
scf_2415_36128	BIMP22901	Vertebrata	EOG091G0EQO
scf_2415_36128	BIMP23387	Vertebrata	EOG091G0YWP
scf_2415_36128	BIMP24059	Vertebrata	EOG091G0I39
scf_2415_36128	BIMP24770	Unique
scf_2415_36128	BIMP25406	Insecta	EOG091G17JM
scf_4016_38023	BIMP16241	Unique
scf_4016_38023	BIMP16284	Unique
scf_4016_38023	BIMP16767	Vertebrata	EOG091G0UO7
scf_4016_38023	BIMP18218	Vertebrata	EOG091G02XD
scf_4016_38023	BIMP19781	Arthropoda	EOG091G058N
scf_4016_38023	BIMP20378	Hymenoptera	EOG091G0NCP
scf_4016_38023	BIMP20437	Vertebrata	EOG091G0CPA
scf_4016_38023	BIMP20490	Vertebrata	EOG091G01MR
scf_4016_38023	BIMP21008	Vertebrata	EOG091G0H46
scf_4016_38023	BIMP21266	Insecta	EOG091G0CWM
scf_4016_38023	BIMP22836	Vertebrata	EOG091G0O1O
scf_4016_38023	BIMP23318	Vertebrata	EOG091G0NEN
scf_4016_38023	BIMP23493	Vertebrata	EOG091G0J2O

## Sheet: bter_lin_spec_targets
miR_ID	Target_gene_ID	Orthogroup_age	Orthogroup_ID
NC_015771.1_8901	Bter12055	Vertebrata
NC_015767.1_5001	Bter10154	Unique
NC_015768.1_5642	Bter11468	Vertebrata
NC_015773.1_10902	Bter13476	Vertebrata
NC_015764.1_2297	Bter09522	Vertebrata
NC_015764.1_2297	Bter10086	Vertebrata
NW_003567285.1_20861	Bter10115	Vertebrata
NC_015767.1_5001	Bter08982	Vertebrata
NC_015767.1_5001	Bter05500	Vertebrata
NC_015778.1_13426	Bter09257	Vertebrata
NC_015766.1_4550	Bter09426	Unique
NW_003566517.1_19737	Bter10058	Vertebrata
NC_015770.1_7450	Bter09035	Unique
NC_015764.1_2297	Bter02181	Holometabola
NC_015763.1_1478	Bter09246	Unique
NC_015762.1_57	Bter08949	Holometabola
NC_015766.1_4550	Bter01567	Vertebrata
NC_015768.1_5776	Bter01969	Vertebrata
NC_015762.1_57	Bter09184	Vertebrata
NC_015773.1_10902	Bter03037	Vertebrata
NC_015773.1_10736	Bter00496	Vertebrata
NC_015768.1_5642	Bter00501	Vertebrata
NC_015767.1_5001	Bter06888	Vertebrata
NC_015770.1_7859	Bter07916	Vertebrata
NC_015762.1_144	Bter04154	Vertebrata
NC_015766.1_4903	Bter04166	Metazoa
NC_015769.1_7247	Bter03041	Hymenoptera
NC_015763.1_1478	Bter06333	Vertebrata
NC_015769.1_7247	Bter11929	Vertebrata
NC_015766.1_4903	Bter08839	Vertebrata
NW_003566485.1_19600	Bter08879	Vertebrata
NC_015779.1_13973	Bter05503	Vertebrata
NC_015762.1_144	Bter05545	Vertebrata
NC_015768.1_5776	Bter10724	Vertebrata
NC_015763.1_1478	Bter13432	Arthropoda
NC_015773.1_10736	Bter07231	Metazoa
NC_015763.1_1478	Bter01656	Vertebrata
NC_015770.1_7859	Bter01642	Vertebrata
NC_015766.1_4550	Bter04463	Insecta
NC_015767.1_5001	Bter04880	Holometabola
NC_015772.1_9689	Bter04826	Vertebrata
NC_015773.1_10736	Bter08589	Vertebrata
NW_003567285.1_20861	Bter08589	Vertebrata
NC_015775.1_11380	Bter10606	Vertebrata
NW_003566517.1_19737	Bter07571	Vertebrata
NC_015763.1_1478	Bter11909	Vertebrata
NC_015767.1_5001	Bter01173	Vertebrata
NC_015773.1_10736	Bter11312	Vertebrata
NC_015764.1_2297	Bter10658	Vertebrata
NC_015766.1_4550	Bter12547	Metazoa
NC_015766.1_4903	Bter00595	Vertebrata
NC_015762.1_57	Bter07192	Vertebrata
NC_015771.1_8901	Bter07181	Vertebrata
NC_015767.1_5001	Bter07063	Vertebrata
NC_015768.1_5776	Bter05684	Vertebrata
NC_015768.1_5642	Bter04953	Vertebrata
NC_015768.1_5776	Bter08348	Vertebrata
NC_015773.1_10736	Bter08324	Vertebrata
NC_015762.1_144	Bter08312	Metazoa
NC_015762.1_144	Bter08290	Vertebrata
NC_015775.1_11380	Bter11269	Vertebrata
NW_003566517.1_19737	Bter08147	Metazoa
NC_015770.1_7859	Bter08121	Metazoa
NC_015771.1_8901	Bter08074	Metazoa
NC_015768.1_5776	Bter08024	Vertebrata
NC_015764.1_2297	Bter01181	Hymenoptera
NC_015771.1_8901	Bter10588	Vertebrata
NC_015764.1_2297	Bter00623	Vertebrata
NC_015770.1_7859	Bter06259	Vertebrata
NC_015764.1_2297	Bter05617	Vertebrata
NC_015775.1_11380	Bter12097	Metazoa
NW_003566517.1_19737	Bter01866	Vertebrata
NW_003570850.1_24942	Bter01914	Vertebrata
NC_015762.1_57	Bter00212	Vertebrata
NC_015762.1_144	Bter00250	Vertebrata
NC_015775.1_11920	Bter00265	Vertebrata
NC_015762.1_57	Bter00282	Vertebrata
NW_003566485.1_19600	Bter06004	Vertebrata
NC_015762.1_57	Bter11807	Vertebrata
NW_003566384.1_18943	Bter05811	Apoidea
NC_015762.1_57	Bter09644	Vertebrata
NC_015762.1_144	Bter06841	Vertebrata
NC_015771.1_8901	Bter06840	Vertebrata
NC_015762.1_144	Bter06823	Vertebrata
NC_015767.1_5325	Bter06823	Vertebrata
NC_015773.1_10902	Bter06698	Vertebrata
NC_015770.1_7859	Bter05422	Vertebrata
NW_003566517.1_19737	Bter05422	Vertebrata
NC_015768.1_5659	Bter12791	Vertebrata
NC_015775.1_11380	Bter05198	Vertebrata
NC_015773.1_10902	Bter05169	Vertebrata
NC_015775.1_11380	Bter05099	Vertebrata
NW_003566517.1_19737	Bter05055	Metazoa
NC_015775.1_11920	Bter06489	Vertebrata
NC_015763.1_1478	Bter00736	Vertebrata
NC_015768.1_5642	Bter00850	Vertebrata
NC_015766.1_4550	Bter00869	Vertebrata
NC_015772.1_9352	Bter00935	Vertebrata
NC_015762.1_57	Bter00955	Vertebrata
NC_015769.1_7247	Bter01093	Metazoa
NC_015773.1_10902	Bter01126	Vertebrata
NC_015768.1_5659	Bter01364	Vertebrata
NC_015766.1_4903	Bter01291	Vertebrata
NC_015763.1_1478	Bter01235	Vertebrata
NC_015762.1_57	Bter01143	Vertebrata
NC_015775.1_11920	Bter11615	Vertebrata
NC_015762.1_57	Bter02268	Vertebrata
NC_015767.1_5001	Bter10495	Vertebrata
NC_015762.1_57	Bter11628	Vertebrata
NC_015766.1_4550	Bter02040	Vertebrata
NW_003566517.1_19737	Bter02820	Vertebrata
NW_003566517.1_19737	Bter10567	Vertebrata
NC_015762.1_144	Bter02489	Vertebrata
NC_015775.1_11380	Bter02427	Vertebrata
NC_015762.1_144	Bter10594	Vertebrata
NC_015762.1_144	Bter12654	Apoidea
NC_015762.1_144	Bter13185	Unique
NC_015762.1_57	Bter00356	Unique
NC_015762.1_57	Bter07156	Unique
NC_015762.1_57	Bter09109	Unique
NC_015762.1_57	Bter09523	Vertebrata
NC_015762.1_57	Bter10615	Hymenoptera
NC_015762.1_57	Bter12077	Unique
NC_015762.1_57	Bter12883	Unique
NC_015763.1_1478	Bter09809	Unique
NC_015763.1_1478	Bter10002	Vertebrata
NC_015763.1_1478	Bter10243	Vertebrata
NC_015763.1_1478	Bter12644	Unique
NC_015763.1_1478	Bter13135	Unique
NC_015764.1_2297	Bter02535	Unique
NC_015764.1_2297	Bter02610	Unique
NC_015764.1_2297	Bter02994	Vertebrata
NC_015764.1_2297	Bter07020	Unique
NC_015764.1_2297	Bter11101	Metazoa
NC_015764.1_2297	Bter12704	Vertebrata
NC_015764.1_2297	Bter13086	Unique
NC_015764.1_2297	Bter13281	Unique
NC_015764.1_2297	Bter13288	Unique
NC_015764.1_2297	Bter13378	Unique
NC_015766.1_4550	Bter05853	Arthropoda
NC_015766.1_4550	Bter12072	Unique
NC_015766.1_4550	Bter12969	Unique
NC_015766.1_4903	Bter10295	Vertebrata
NC_015767.1_5001	Bter02350	Unique
NC_015767.1_5001	Bter12368	Unique
NC_015767.1_5001	Bter12620	Unique
NC_015767.1_5001	Bter12871	Unique
NC_015767.1_5001	Bter12973	Unique
NC_015767.1_5325	Bter10594	Vertebrata
NC_015767.1_5325	Bter12654	Apoidea
NC_015767.1_5325	Bter13077	Unique
NC_015768.1_5659	Bter06361	Arthropoda
NC_015768.1_5659	Bter09335	Vertebrata
NC_015768.1_5776	Bter00497	Unique
NC_015768.1_5776	Bter03169	Unique
NC_015768.1_5776	Bter12358	Unique
NC_015768.1_5776	Bter12680	Unique
NC_015769.1_7247	Bter00295	Unique
NC_015769.1_7247	Bter12135	Unique
NC_015770.1_7859	Bter01271	Unique
NC_015770.1_7859	Bter09595	Unique
NC_015770.1_7859	Bter12429	Unique
NC_015771.1_8901	Bter13458	Unique
NC_015772.1_9352	Bter01271	Unique
NC_015772.1_9352	Bter05305	Hymenoptera
NC_015772.1_9352	Bter09779	Unique
NC_015772.1_9352	Bter12648	Unique
NC_015773.1_10736	Bter10246	Apoidea
NC_015773.1_10736	Bter12153	Apoidea
NC_015773.1_10902	Bter01080	Unique
NC_015773.1_10902	Bter10018	Vertebrata
NC_015773.1_10902	Bter12272	Vertebrata
NC_015773.1_10902	Bter12897	Unique
NC_015775.1_11380	Bter10017	Unique
NC_015775.1_11380	Bter11389	Vertebrata
NC_015775.1_11380	Bter12497	Unique
NC_015775.1_11380	Bter12631	Unique
NC_015775.1_11380	Bter12799	Unique
NC_015775.1_11920	Bter01324	Unique
NC_015775.1_11920	Bter04011	Metazoa
NC_015775.1_11920	Bter12126	Unique
NC_015775.1_11920	Bter12595	Holometabola
NC_015779.1_13783	Bter05089	Unique
NC_015779.1_13973	Bter04331	Unique
NC_015779.1_13973	Bter06378	Unique
NC_015779.1_13973	Bter13259	Unique
NW_003566485.1_19600	Bter05424	Unique
NW_003566485.1_19600	Bter05612	Unique
NW_003566517.1_19737	Bter00154	Unique
NW_003566517.1_19737	Bter03101	Unique
NW_003566517.1_19737	Bter08948	Unique
NW_003566517.1_19737	Bter09781	Unique
NW_003566517.1_19737	Bter13505	Unique
NW_003567285.1_20861	Bter04277	Vertebrata
NW_003567285.1_20861	Bter08640	Metazoa
NW_003567285.1_20861	Bter10246	Apoidea
NW_003567285.1_20861	Bter12722	Unique

## Sheet: mgen_lin_spec_targets
miR_ID	Target_gene_ID	Orthogroup_age	Orthogroup_ID
scaffold102_3959	Mgen01648	Vertebrata	EOG091G0A5H
scaffold102_3959	Mgen03320	Vertebrata	EOG091G0MUU
scaffold102_3959	Mgen06447	Unique
scaffold102_3959	Mgen07701	Vertebrata	EOG091G02XM
scaffold102_3962	Mgen00511	Vertebrata	EOG091G037O
scaffold102_3962	Mgen05050	Unique
scaffold102_3962	Mgen05197	Apoidea	EOG091G12VF
scaffold102_3962	Mgen06287	Vertebrata	EOG091G02JO
scaffold102_3962	Mgen08723	Aculeata	EOG091G0KDR
scaffold105_12976	Mgen07343	Vertebrata	EOG091G01BJ
scaffold105_12977	Mgen05196	Apoidea	EOG091G12VF
scaffold105_12977	Mgen09675	Vertebrata	EOG091G0Y4N
scaffold105_12977	Mgen10725	Vertebrata	EOG091G0D30
scaffold105_12977	Mgen12472	Unique
scaffold119_28341	Mgen05419	Vertebrata	EOG091G0QR8
scaffold119_28341	Mgen06829	Vertebrata	EOG091G0K58
scaffold119_28341	Mgen07231	Vertebrata	EOG091G0AJQ
scaffold119_28341	Mgen08693	Vertebrata	EOG091G0B4E
scaffold119_28341	Mgen08927	Vertebrata	EOG091G0HPD
scaffold119_28341	Mgen09687	Metazoa	EOG091G0A3A
scaffold12_11087	Mgen01133	Vertebrata	EOG091G02D5
scaffold12_11087	Mgen01407	Vertebrata	EOG091G0BOU
scaffold12_11087	Mgen02369	Metazoa	EOG091G0YKM
scaffold12_11087	Mgen07261	Vertebrata	EOG091G05PM
scaffold12_11087	Mgen09667	Vertebrata	EOG091G019X
scaffold12_11087	Mgen10133	Vertebrata	EOG091G15XZ
scaffold12_11087	Mgen10208	Vertebrata	EOG091G0AV3
scaffold12_11087	Mgen11581	Vertebrata	EOG091G00U6
scaffold12_11087	Mgen11930	Vertebrata	EOG091G14DA
scaffold12_11160	Mgen00323	Vertebrata	EOG091G0BUO
scaffold12_11160	Mgen00653	Vertebrata	EOG091G02TP
scaffold12_11160	Mgen00766	Vertebrata	EOG091G084B
scaffold12_11160	Mgen01743	Vertebrata	EOG091G00C2
scaffold12_11160	Mgen02312	Unique
scaffold12_11160	Mgen02888	Vertebrata	EOG091G0MUU
scaffold12_11160	Mgen03045	Vertebrata	EOG091G0Y4N
scaffold12_11160	Mgen03299	Hymenoptera	EOG091G0YUK
scaffold12_11160	Mgen03343	Vertebrata	EOG091G0XRQ
scaffold12_11160	Mgen04628	Vertebrata	EOG091G066V
scaffold12_11160	Mgen06439	Vertebrata	EOG091G140M
scaffold12_11160	Mgen06510	Hymenoptera	EOG091G0RX4
scaffold12_11160	Mgen07110	Unique
scaffold12_11160	Mgen08467	Vertebrata	EOG091G0BYE
scaffold12_11160	Mgen08571	Vertebrata	EOG091G144P
scaffold12_11160	Mgen09693	Vertebrata	EOG091G11T4
scaffold12_11160	Mgen09899	Unique
scaffold12_11160	Mgen11319	Insecta	EOG091G0QQP
scaffold12_11160	Mgen12046	Arthropoda	EOG091G12GW
scaffold124_8101	Mgen00446	Vertebrata	EOG091G0006
scaffold124_8101	Mgen00618	Vertebrata	EOG091G095Z
scaffold124_8101	Mgen01233	Unique
scaffold124_8101	Mgen01551	Insecta	EOG091G00DJ
scaffold124_8101	Mgen01584	Vertebrata	EOG091G0CRR
scaffold124_8101	Mgen01689	Vertebrata	EOG091G0XRQ
scaffold124_8101	Mgen02197	Unique
scaffold124_8101	Mgen02220	Metazoa	EOG091G0DAX
scaffold124_8101	Mgen02310	Vertebrata	EOG091G0I8R
scaffold124_8101	Mgen02351	Vertebrata	EOG091G004G
scaffold124_8101	Mgen02356	Vertebrata	EOG091G092Y
scaffold124_8101	Mgen02433	Unique
scaffold124_8101	Mgen02439	Vertebrata	EOG091G02MV
scaffold124_8101	Mgen02740	Vertebrata	EOG091G03E1
scaffold124_8101	Mgen03467	Arthropoda	EOG091G13OO
scaffold124_8101	Mgen03729	Unique
scaffold124_8101	Mgen03789	Vertebrata	EOG091G0805
scaffold124_8101	Mgen04244	Vertebrata	EOG091G0S4E
scaffold124_8101	Mgen04524	Metazoa	EOG091G0J8Q
scaffold124_8101	Mgen04852	Aculeata	EOG091G0PT6
scaffold124_8101	Mgen05159	Vertebrata	EOG091G0KT8
scaffold124_8101	Mgen05528	Vertebrata	EOG091G0JWA
scaffold124_8101	Mgen05540	Unique
scaffold124_8101	Mgen05820	Vertebrata	EOG091G06SQ
scaffold124_8101	Mgen06141	Insecta	EOG091G0WOE
scaffold124_8101	Mgen06942	Unique
scaffold124_8101	Mgen07471	Insecta	EOG091G0R3Y
scaffold124_8101	Mgen07865	Hymenoptera	EOG091G0TO5
scaffold124_8101	Mgen08097	Unique
scaffold124_8101	Mgen08558	Unique
scaffold124_8101	Mgen08560	Arthropoda	EOG091G160C
scaffold124_8101	Mgen08728	Vertebrata	EOG091G08I9
scaffold124_8101	Mgen08756	Hymenoptera	EOG091G0LPL
scaffold124_8101	Mgen09241	Vertebrata	EOG091G0AZH
scaffold124_8101	Mgen09556	Vertebrata	EOG091G02ZT
scaffold124_8101	Mgen09615	Metazoa	EOG091G0A7Y
scaffold124_8101	Mgen09905	Vertebrata	EOG091G151V
scaffold124_8101	Mgen10230	Unique
scaffold124_8101	Mgen10634	Unique
scaffold124_8101	Mgen10905	Vertebrata	EOG091G0E0V
scaffold124_8101	Mgen10961	Vertebrata	EOG091G17M8
scaffold124_8101	Mgen11043	Vertebrata	EOG091G0Y4N
scaffold124_8101	Mgen11598	Hymenoptera	EOG091G06XC
scaffold124_8101	Mgen11612	Vertebrata	EOG091G167Y
scaffold124_8101	Mgen12018	Vertebrata	EOG091G0OG2
scaffold124_8101	Mgen12062	Unique
scaffold124_8101	Mgen12184	Unique
scaffold124_8101	Mgen12531	Vertebrata	EOG091G0FXR
scaffold124_8101	Mgen12751	Vertebrata	EOG091G1600
scaffold1332_10131	Mgen07670	Vertebrata	EOG091G08V8
scaffold1332_10131	Mgen11761	Vertebrata	EOG091G0Y4N
scaffold145_5017	Mgen00188	Metazoa	EOG091G04F5
scaffold145_5017	Mgen00433	Vertebrata	EOG091G033G
scaffold145_5017	Mgen00446	Vertebrata	EOG091G0006
scaffold145_5017	Mgen00498	Vertebrata	EOG091G14DP
scaffold145_5017	Mgen00518	Vertebrata	EOG091G0KT8
scaffold145_5017	Mgen00552	Unique
scaffold145_5017	Mgen00611	Unique
scaffold145_5017	Mgen00796	Vertebrata	EOG091G04NO
scaffold145_5017	Mgen00850	Vertebrata	EOG091G0FG8
scaffold145_5017	Mgen01018	Vertebrata	EOG091G0P8S
scaffold145_5017	Mgen01019	Unique
scaffold145_5017	Mgen01496	Vertebrata	EOG091G04OW
scaffold145_5017	Mgen01624	Unique
scaffold145_5017	Mgen01661	Vertebrata	EOG091G0BE7
scaffold145_5017	Mgen01684	Metazoa	EOG091G1AEF
scaffold145_5017	Mgen01729	Vertebrata	EOG091G02KC
scaffold145_5017	Mgen01991	Metazoa	EOG091G00XE
scaffold145_5017	Mgen02095	Vertebrata	EOG091G024D
scaffold145_5017	Mgen02167	Vertebrata	EOG091G0LEQ
scaffold145_5017	Mgen02222	Vertebrata	EOG091G0I86
scaffold145_5017	Mgen02273	Insecta	EOG091G0I1L
scaffold145_5017	Mgen02437	Vertebrata	EOG091G029I
scaffold145_5017	Mgen02541	Vertebrata	EOG091G0ODW
scaffold145_5017	Mgen02657	Vertebrata	EOG091G12OH
scaffold145_5017	Mgen02918	Vertebrata	EOG091G0Y4N
scaffold145_5017	Mgen03226	Unique
scaffold145_5017	Mgen03302	Vertebrata	EOG091G0GHR
scaffold145_5017	Mgen03547	Vertebrata	EOG091G09LW
scaffold145_5017	Mgen03576	Hymenoptera	EOG091G1415
scaffold145_5017	Mgen03625	Vertebrata	EOG091G1BEO
scaffold145_5017	Mgen03740	Metazoa	EOG091G0AEA
scaffold145_5017	Mgen03895	Unique
scaffold145_5017	Mgen03949	Unique
scaffold145_5017	Mgen03974	Metazoa	EOG091G0GQ0
scaffold145_5017	Mgen04048	Vertebrata	EOG091G0Y4N
scaffold145_5017	Mgen04098	Unique
scaffold145_5017	Mgen04121	Unique
scaffold145_5017	Mgen04183	Unique
scaffold145_5017	Mgen04310	Vertebrata	EOG091G0I8R
scaffold145_5017	Mgen04477	Metazoa	EOG091G07K2
scaffold145_5017	Mgen04524	Metazoa	EOG091G0J8Q
scaffold145_5017	Mgen04561	Vertebrata	EOG091G0YX6
scaffold145_5017	Mgen04621	Unique
scaffold145_5017	Mgen04840	Vertebrata	EOG091G0N7M
scaffold145_5017	Mgen04866	Vertebrata	EOG091G0Y4N
scaffold145_5017	Mgen04935	Unique
scaffold145_5017	Mgen04969	Vertebrata	EOG091G01FG
scaffold145_5017	Mgen05078	Vertebrata	EOG091G0Y4N
scaffold145_5017	Mgen05102	Vertebrata	EOG091G00Y0
scaffold145_5017	Mgen05109	Vertebrata	EOG091G07NH
scaffold145_5017	Mgen05277	Holometabola	EOG091G0UKN
scaffold145_5017	Mgen05363	Vertebrata	EOG091G0UHT
scaffold145_5017	Mgen05394	Vertebrata	EOG091G0QJA
scaffold145_5017	Mgen05449	Vertebrata	EOG091G05ZT
scaffold145_5017	Mgen05641	Unique
scaffold145_5017	Mgen05790	Vertebrata	EOG091G16CK
scaffold145_5017	Mgen05951	Vertebrata	EOG091G006A
scaffold145_5017	Mgen05990	Unique
scaffold145_5017	Mgen05995	Vertebrata	EOG091G0Y4N
scaffold145_5017	Mgen06073	Vertebrata	EOG091G06A1
scaffold145_5017	Mgen06531	Aculeata	EOG091G1AIR
scaffold145_5017	Mgen06577	Holometabola	EOG091G09J1
scaffold145_5017	Mgen06584	Vertebrata	EOG091G0BT8
scaffold145_5017	Mgen06585	Vertebrata	EOG091G0BT8
scaffold145_5017	Mgen06586	Unique
scaffold145_5017	Mgen06617	Vertebrata	EOG091G0QR8
scaffold145_5017	Mgen06684	Vertebrata	EOG091G0MLF
scaffold145_5017	Mgen06728	Vertebrata	EOG091G03FE
scaffold145_5017	Mgen06934	Vertebrata	EOG091G0ODW
scaffold145_5017	Mgen06989	Unique
scaffold145_5017	Mgen07050	Unique
scaffold145_5017	Mgen07142	Unique
scaffold145_5017	Mgen07261	Vertebrata	EOG091G05PM
scaffold145_5017	Mgen07306	Unique
scaffold145_5017	Mgen07349	Vertebrata	EOG091G03BV
scaffold145_5017	Mgen07556	Vertebrata	EOG091G0Y4N
scaffold145_5017	Mgen07678	Hymenoptera	EOG091G18LB
scaffold145_5017	Mgen07780	Vertebrata	EOG091G0150
scaffold145_5017	Mgen07913	Vertebrata	EOG091G0RSF
scaffold145_5017	Mgen07995	Vertebrata	EOG091G0613
scaffold145_5017	Mgen08143	Insecta	EOG091G0YOM
scaffold145_5017	Mgen08173	Unique
scaffold145_5017	Mgen08177	Unique
scaffold145_5017	Mgen08310	Unique
scaffold145_5017	Mgen08351	Metazoa	EOG091G0YB9
scaffold145_5017	Mgen08371	Arthropoda	EOG091G1B9E
scaffold145_5017	Mgen08455	Vertebrata	EOG091G0DF0
scaffold145_5017	Mgen08607	Vertebrata	EOG091G02KC
scaffold145_5017	Mgen08781	Vertebrata	EOG091G07OC
scaffold145_5017	Mgen08784	Vertebrata	EOG091G135G
scaffold145_5017	Mgen09018	Vertebrata	EOG091G0JYJ
scaffold145_5017	Mgen09319	Vertebrata	EOG091G0I4G
scaffold145_5017	Mgen09428	Vertebrata	EOG091G0Y4N
scaffold145_5017	Mgen09431	Vertebrata	EOG091G0571
scaffold145_5017	Mgen09561	Vertebrata	EOG091G05AE
scaffold145_5017	Mgen09587	Vertebrata	EOG091G0ID2
scaffold145_5017	Mgen09637	Vertebrata	EOG091G0ODW
scaffold145_5017	Mgen09693	Vertebrata	EOG091G11T4
scaffold145_5017	Mgen09901	Vertebrata	EOG091G0MOP
scaffold145_5017	Mgen10098	Unique
scaffold145_5017	Mgen10125	Unique
scaffold145_5017	Mgen10224	Vertebrata	EOG091G0KT8
scaffold145_5017	Mgen10402	Vertebrata	EOG091G0QJA
scaffold145_5017	Mgen10488	Vertebrata	EOG091G0Y4N
scaffold145_5017	Mgen10503	Unique
scaffold145_5017	Mgen10558	Vertebrata	EOG091G0007
scaffold145_5017	Mgen10664	Vertebrata	EOG091G01DB
scaffold145_5017	Mgen11048	Vertebrata	EOG091G09CU
scaffold145_5017	Mgen11082	Unique
scaffold145_5017	Mgen11189	Vertebrata	EOG091G0Y4N
scaffold145_5017	Mgen11235	Unique
scaffold145_5017	Mgen11426	Vertebrata	EOG091G0UHT
scaffold145_5017	Mgen11479	Vertebrata	EOG091G0XRQ
scaffold145_5017	Mgen11528	Unique
scaffold145_5017	Mgen11645	Vertebrata	EOG091G01J4
scaffold145_5017	Mgen11798	Vertebrata	EOG091G05HA
scaffold145_5017	Mgen11855	Vertebrata	EOG091G0Y4N
scaffold145_5017	Mgen11897	Vertebrata	EOG091G15H5
scaffold145_5017	Mgen11916	Metazoa	EOG091G017W
scaffold145_5017	Mgen11931	Unique
scaffold145_5017	Mgen12177	Apoidea	EOG091G07W8
scaffold145_5017	Mgen12179	Vertebrata	EOG091G0Y4N
scaffold145_5017	Mgen12182	Vertebrata	EOG091G06RP
scaffold145_5017	Mgen12186	Vertebrata	EOG091G0Y4N
scaffold145_5017	Mgen12222	Vertebrata	EOG091G0I1O
scaffold145_5017	Mgen12273	Unique
scaffold145_5017	Mgen12374	Vertebrata	EOG091G0QGU
scaffold145_5017	Mgen12515	Vertebrata	EOG091G06FQ
scaffold145_5017	Mgen12717	Vertebrata	EOG091G0RNX
scaffold145_5017	Mgen12734	Insecta	EOG091G0N1B
scaffold145_5017	Mgen12741	Vertebrata	EOG091G07C8
scaffold147_13458	Mgen00373	Arthropoda	EOG091G0Z0F
scaffold147_13458	Mgen00602	Vertebrata	EOG091G043W
scaffold147_13458	Mgen02465	Vertebrata	EOG091G00GE
scaffold147_13458	Mgen03201	Vertebrata	EOG091G0O31
scaffold147_13458	Mgen03287	Vertebrata	EOG091G0JJY
scaffold147_13458	Mgen03354	Vertebrata	EOG091G0JVF
scaffold147_13458	Mgen03570	Vertebrata	EOG091G1IU5
scaffold147_13458	Mgen03901	Unique
scaffold147_13458	Mgen03997	Unique
scaffold147_13458	Mgen04031	Vertebrata	EOG091G0FXK
scaffold147_13458	Mgen04169	Vertebrata	EOG091G0KDN
scaffold147_13458	Mgen04455	Vertebrata	EOG091G0N2V
scaffold147_13458	Mgen04558	Vertebrata	EOG091G0AQY
scaffold147_13458	Mgen04982	Vertebrata	EOG091G1600
scaffold147_13458	Mgen05553	Vertebrata	EOG091G06CD
scaffold147_13458	Mgen06683	Vertebrata	EOG091G1600
scaffold147_13458	Mgen06876	Unique
scaffold147_13458	Mgen07262	Vertebrata	EOG091G0ODW
scaffold147_13458	Mgen07318	Vertebrata	EOG091G00SI
scaffold147_13458	Mgen07896	Unique
scaffold147_13458	Mgen08169	Vertebrata	EOG091G0Y4N
scaffold147_13458	Mgen08486	Vertebrata	EOG091G0JXY
scaffold147_13458	Mgen08688	Vertebrata	EOG091G07C9
scaffold147_13458	Mgen09017	Vertebrata	EOG091G0JYJ
scaffold147_13458	Mgen09345	Vertebrata	EOG091G088J
scaffold147_13458	Mgen10079	Arthropoda	EOG091G0BQH
scaffold147_13458	Mgen10838	Hymenoptera	EOG091G15FM
scaffold147_13458	Mgen11424	Unique
scaffold147_13458	Mgen11533	Unique
scaffold147_13458	Mgen12125	Vertebrata	EOG091G0TRP
scaffold147_13458	Mgen12457	Vertebrata	EOG091G0V6S
scaffold147_13458	Mgen12726	Vertebrata	EOG091G0LZ2
scaffold160_22611	Mgen00314	Vertebrata	EOG091G01O1
scaffold160_22611	Mgen02221	Unique
scaffold160_22611	Mgen02723	Unique
scaffold160_22611	Mgen10403	Vertebrata	EOG091G0QJA
scaffold160_22611	Mgen12199	Vertebrata	EOG091G0ELJ
scaffold16_21978	Mgen07449	Vertebrata	EOG091G0NJ6
scaffold16_21978	Mgen07643	Vertebrata	EOG091G1600
scaffold16_21978	Mgen09018	Vertebrata	EOG091G0JYJ
scaffold16_21978	Mgen09755	Vertebrata	EOG091G003B
scaffold16_21978	Mgen10501	Vertebrata	EOG091G02ZA
scaffold16_21978	Mgen11022	Vertebrata	EOG091G0F8X
scaffold183_19764	Mgen00139	Vertebrata	EOG091G00YQ
scaffold183_19764	Mgen00168	Vertebrata	EOG091G0OOG
scaffold183_19764	Mgen00424	Unique
scaffold183_19764	Mgen00514	Vertebrata	EOG091G0QJA
scaffold183_19764	Mgen00847	Vertebrata	EOG091G0FG8
scaffold183_19764	Mgen00957	Hymenoptera	EOG091G0DVO
scaffold183_19764	Mgen00960	Metazoa	EOG091G03J4
scaffold183_19764	Mgen01012	Vertebrata	EOG091G0HS8
scaffold183_19764	Mgen01363	Vertebrata	EOG091G09F3
scaffold183_19764	Mgen01423	Vertebrata	EOG091G04JU
scaffold183_19764	Mgen01464	Vertebrata	EOG091G052A
scaffold183_19764	Mgen02280	Vertebrata	EOG091G16AJ
scaffold183_19764	Mgen03011	Vertebrata	EOG091G0M9L
scaffold183_19764	Mgen03019	Vertebrata	EOG091G0DHL
scaffold183_19764	Mgen03048	Vertebrata	EOG091G0Y4N
scaffold183_19764	Mgen03340	Unique
scaffold183_19764	Mgen03532	Vertebrata	EOG091G0KMT
scaffold183_19764	Mgen03546	Vertebrata	EOG091G078V
scaffold183_19764	Mgen03569	Vertebrata	EOG091G0CXB
scaffold183_19764	Mgen03594	Vertebrata	EOG091G0LK5
scaffold183_19764	Mgen03950	Vertebrata	EOG091G048M
scaffold183_19764	Mgen03957	Vertebrata	EOG091G0C78
scaffold183_19764	Mgen03978	Vertebrata	EOG091G0Y4N
scaffold183_19764	Mgen04059	Vertebrata	EOG091G0Y4N
scaffold183_19764	Mgen04521	Hymenoptera	EOG091G1AK5
scaffold183_19764	Mgen04671	Vertebrata	EOG091G0EUB
scaffold183_19764	Mgen04738	Metazoa	EOG091G0XGN
scaffold183_19764	Mgen05254	Unique
scaffold183_19764	Mgen05475	Vertebrata	EOG091G05VU
scaffold183_19764	Mgen05650	Vertebrata	EOG091G0QR8
scaffold183_19764	Mgen05982	Vertebrata	EOG091G0Y4N
scaffold183_19764	Mgen06855	Vertebrata	EOG091G0VUT
scaffold183_19764	Mgen06939	Vertebrata	EOG091G0NJ6
scaffold183_19764	Mgen07255	Unique
scaffold183_19764	Mgen07609	Vertebrata	EOG091G03Z1
scaffold183_19764	Mgen07737	Unique
scaffold183_19764	Mgen09066	Unique
scaffold183_19764	Mgen09110	Unique
scaffold183_19764	Mgen09259	Unique
scaffold183_19764	Mgen09600	Unique
scaffold183_19764	Mgen09663	Vertebrata	EOG091G0A6V
scaffold183_19764	Mgen09696	Vertebrata	EOG091G05OJ
scaffold183_19764	Mgen09850	Vertebrata	EOG091G0Y4N
scaffold183_19764	Mgen09951	Vertebrata	EOG091G0QST
scaffold183_19764	Mgen10017	Vertebrata	EOG091G0Y4N
scaffold183_19764	Mgen10026	Arthropoda	EOG091G1AFX
scaffold183_19764	Mgen10053	Vertebrata	EOG091G0P1V
scaffold183_19764	Mgen10278	Vertebrata	EOG091G08PX
scaffold183_19764	Mgen10443	Vertebrata	EOG091G0Y4N
scaffold183_19764	Mgen10593	Vertebrata	EOG091G1J41
scaffold183_19764	Mgen10666	Metazoa	EOG091G0NSC
scaffold183_19764	Mgen10845	Vertebrata	EOG091G03L0
scaffold183_19764	Mgen10939	Vertebrata	EOG091G06JU
scaffold183_19764	Mgen11050	Unique
scaffold183_19764	Mgen11115	Vertebrata	EOG091G0E1Y
scaffold183_19764	Mgen12063	Vertebrata	EOG091G132X
scaffold183_19764	Mgen12748	Vertebrata	EOG091G049U
scaffold18_45588	Mgen00173	Vertebrata	EOG091G021J
scaffold18_45588	Mgen00187	Arthropoda	EOG091G031H
scaffold18_45588	Mgen00351	Vertebrata	EOG091G18G8
scaffold18_45588	Mgen00396	Vertebrata	EOG091G0K3F
scaffold18_45588	Mgen00747	Vertebrata	EOG091G0DQH
scaffold18_45588	Mgen00846	Vertebrata	EOG091G0V73
scaffold18_45588	Mgen00878	Metazoa	EOG091G1BIN
scaffold18_45588	Mgen00896	Unique
scaffold18_45588	Mgen00937	Vertebrata	EOG091G0YWP
scaffold18_45588	Mgen01029	Unique
scaffold18_45588	Mgen01073	Vertebrata	EOG091G0S9R
scaffold18_45588	Mgen01112	Vertebrata	EOG091G005W
scaffold18_45588	Mgen01163	Vertebrata	EOG091G12G6
scaffold18_45588	Mgen01403	Vertebrata	EOG091G0H1T
scaffold18_45588	Mgen02136	Unique
scaffold18_45588	Mgen02191	Metazoa	EOG091G06X5
scaffold18_45588	Mgen02340	Vertebrata	EOG091G12E7
scaffold18_45588	Mgen02434	Unique
scaffold18_45588	Mgen02681	Vertebrata	EOG091G00JD
scaffold18_45588	Mgen03067	Vertebrata	EOG091G0EJL
scaffold18_45588	Mgen03260	Vertebrata	EOG091G0RFR
scaffold18_45588	Mgen03285	Unique
scaffold18_45588	Mgen03559	Metazoa	EOG091G0N0G
scaffold18_45588	Mgen03974	Metazoa	EOG091G0GQ0
scaffold18_45588	Mgen04041	Vertebrata	EOG091G0K9X
scaffold18_45588	Mgen04075	Metazoa	EOG091G0LNX
scaffold18_45588	Mgen04262	Vertebrata	EOG091G0AZH
scaffold18_45588	Mgen04280	Unique
scaffold18_45588	Mgen04405	Vertebrata	EOG091G02KC
scaffold18_45588	Mgen04442	Vertebrata	EOG091G0KR9
scaffold18_45588	Mgen04567	Unique
scaffold18_45588	Mgen04906	Unique
scaffold18_45588	Mgen05277	Holometabola	EOG091G0UKN
scaffold18_45588	Mgen05618	Unique
scaffold18_45588	Mgen05783	Vertebrata	EOG091G0H3V
scaffold18_45588	Mgen06143	Vertebrata	EOG091G0KT8
scaffold18_45588	Mgen06714	Vertebrata	EOG091G00JL
scaffold18_45588	Mgen06893	Vertebrata	EOG091G0CMF
scaffold18_45588	Mgen06988	Metazoa	EOG091G11GX
scaffold18_45588	Mgen07306	Unique
scaffold18_45588	Mgen07594	Insecta	EOG091G19SV
scaffold18_45588	Mgen08473	Vertebrata	EOG091G0BYE
scaffold18_45588	Mgen08558	Unique
scaffold18_45588	Mgen08627	Vertebrata	EOG091G1600
scaffold18_45588	Mgen08690	Arthropoda	EOG091G0R5E
scaffold18_45588	Mgen08951	Vertebrata	EOG091G003Y
scaffold18_45588	Mgen09521	Metazoa	EOG091G0W5H
scaffold18_45588	Mgen09597	Metazoa	EOG091G0MGC
scaffold18_45588	Mgen09826	Vertebrata	EOG091G0QJA
scaffold18_45588	Mgen09829	Vertebrata	EOG091G02U8
scaffold18_45588	Mgen09849	Vertebrata	EOG091G0Y4N
scaffold18_45588	Mgen10082	Unique
scaffold18_45588	Mgen10114	Unique
scaffold18_45588	Mgen10280	Vertebrata	EOG091G01LV
scaffold18_45588	Mgen10666	Metazoa	EOG091G0NSC
scaffold18_45588	Mgen10676	Vertebrata	EOG091G00DH
scaffold18_45588	Mgen10840	Unique
scaffold18_45588	Mgen10858	Vertebrata	EOG091G0O7O
scaffold18_45588	Mgen10908	Vertebrata	EOG091G00XL
scaffold18_45588	Mgen11084	Vertebrata	EOG091G12OH
scaffold18_45588	Mgen11236	Arthropoda	EOG091G0MCN
scaffold18_45588	Mgen11279	Vertebrata	EOG091G0Y4N
scaffold18_45588	Mgen11343	Vertebrata	EOG091G0TSW
scaffold18_45588	Mgen11645	Vertebrata	EOG091G01J4
scaffold18_45588	Mgen11721	Aculeata	EOG091G0LWK
scaffold18_45588	Mgen11739	Unique
scaffold18_45588	Mgen11949	Vertebrata	EOG091G0ZI7
scaffold18_45588	Mgen11981	Vertebrata	EOG091G0LZ2
scaffold18_45588	Mgen12124	Unique
scaffold18_45588	Mgen12224	Vertebrata	EOG091G0Y4N
scaffold18_45588	Mgen12354	Vertebrata	EOG091G06VI
scaffold18_45588	Mgen12502	Unique
scaffold18_45588	Mgen12698	Vertebrata	EOG091G0A8V
scaffold18_45588	Mgen12750	Vertebrata	EOG091G15AI
scaffold20_400	Mgen00510	Vertebrata	EOG091G0Y4N
scaffold20_400	Mgen01573	Vertebrata	EOG091G0Y4N
scaffold20_400	Mgen01575	Vertebrata	EOG091G0B5S
scaffold20_400	Mgen03441	Vertebrata	EOG091G0MUU
scaffold20_400	Mgen03889	Unique
scaffold20_400	Mgen04164	Unique
scaffold20_400	Mgen05472	Vertebrata	EOG091G02RI
scaffold20_400	Mgen06705	Unique
scaffold20_400	Mgen07139	Vertebrata	EOG091G12YB
scaffold20_400	Mgen08052	Unique
scaffold20_400	Mgen08184	Vertebrata	EOG091G0CHZ
scaffold20_400	Mgen08921	Vertebrata	EOG091G00FO
scaffold20_400	Mgen09722	Vertebrata	EOG091G09M0
scaffold20_400	Mgen11395	Insecta	EOG091G0YJ7
scaffold20_400	Mgen12444	Vertebrata	EOG091G0JNC
scaffold20_400	Mgen12572	Unique
scaffold26_20477	Mgen00092	Unique
scaffold26_20477	Mgen03226	Unique
scaffold26_20477	Mgen03287	Vertebrata	EOG091G0JJY
scaffold26_20477	Mgen03354	Vertebrata	EOG091G0JVF
scaffold26_20477	Mgen03984	Vertebrata	EOG091G067H
scaffold26_20477	Mgen04445	Vertebrata	EOG091G0Y4N
scaffold26_20477	Mgen05763	Vertebrata	EOG091G0SQE
scaffold26_20477	Mgen05975	Vertebrata	EOG091G0Y4N
scaffold26_20477	Mgen07036	Vertebrata	EOG091G0XRQ
scaffold26_20477	Mgen07573	Vertebrata	EOG091G0QJA
scaffold26_20477	Mgen07637	Vertebrata	EOG091G02EX
scaffold26_20477	Mgen08478	Vertebrata	EOG091G0Y4N
scaffold26_20477	Mgen10007	Metazoa	EOG091G06NM
scaffold26_20477	Mgen10051	Vertebrata	EOG091G0P1V
scaffold26_20477	Mgen12435	Vertebrata	EOG091G0957
scaffold26_20481	Mgen03390	Vertebrata	EOG091G0UMX
scaffold26_20481	Mgen05159	Vertebrata	EOG091G0KT8
scaffold26_20481	Mgen09547	Unique
scaffold293_16300	Mgen01945	Unique
scaffold293_16300	Mgen06055	Vertebrata	EOG091G0Y4N
scaffold293_16300	Mgen06791	Arthropoda	EOG091G0ORC
scaffold293_16300	Mgen07150	Vertebrata	EOG091G03VC
scaffold293_16300	Mgen07696	Vertebrata	EOG091G04RK
scaffold293_16300	Mgen08921	Vertebrata	EOG091G00FO
scaffold293_16300	Mgen10168	Vertebrata	EOG091G0C54
scaffold293_16300	Mgen12214	Vertebrata	EOG091G0CQZ
scaffold293_16300	Mgen12382	Vertebrata	EOG091G0BAD
scaffold29_44751	Mgen04143	Vertebrata	EOG091G0805
scaffold29_44751	Mgen06199	Vertebrata	EOG091G0LBR
scaffold29_44751	Mgen06505	Unique
scaffold29_44751	Mgen06628	Unique
scaffold29_44751	Mgen06858	Unique
scaffold29_44751	Mgen09008	Vertebrata	EOG091G0Y4N
scaffold29_44751	Mgen09179	Vertebrata	EOG091G0X24
scaffold29_44751	Mgen09749	Vertebrata	EOG091G0EBP
scaffold29_44751	Mgen11845	Vertebrata	EOG091G0Y4N
scaffold3_16511	Mgen01377	Vertebrata	EOG091G0H5Q
scaffold3_16511	Mgen03287	Vertebrata	EOG091G0JJY
scaffold3_16511	Mgen03465	Vertebrata	EOG091G081P
scaffold3_16511	Mgen03718	Vertebrata	EOG091G08EM
scaffold350_807	Mgen03855	Vertebrata	EOG091G0IQ7
scaffold350_807	Mgen04673	Unique
scaffold350_807	Mgen09098	Vertebrata	EOG091G0NYD
scaffold434_3268	Mgen06414	Insecta	EOG091G00GR
scaffold434_3268	Mgen09296	Vertebrata	EOG091G179T
scaffold434_3268	Mgen09618	Vertebrata	EOG091G15HQ
scaffold434_3268	Mgen11363	Vertebrata	EOG091G07M5
scaffold434_3268	Mgen12183	Arthropoda	EOG091G0VHB
scaffold45_25813	Mgen00319	Vertebrata	EOG091G09DP
scaffold45_25813	Mgen01234	Vertebrata	EOG091G0139
scaffold45_25813	Mgen02679	Arthropoda	EOG091G06CT
scaffold45_25813	Mgen02859	Vertebrata	EOG091G05L3
scaffold45_25813	Mgen05675	Unique
scaffold45_25813	Mgen06970	Vertebrata	EOG091G0Y4N
scaffold45_25813	Mgen07084	Vertebrata	EOG091G0I13
scaffold45_25813	Mgen07105	Vertebrata	EOG091G0GSV
scaffold45_25813	Mgen07603	Vertebrata	EOG091G01KW
scaffold45_25813	Mgen07832	Vertebrata	EOG091G065E
scaffold45_25813	Mgen09002	Vertebrata	EOG091G0Y4N
scaffold45_25813	Mgen09401	Vertebrata	EOG091G0Y4N
scaffold45_25813	Mgen12041	Unique
scaffold52_17008	Mgen00136	Vertebrata	EOG091G0HQ3
scaffold52_17008	Mgen00186	Aculeata	EOG091G10DD
scaffold52_17008	Mgen00369	Vertebrata	EOG091G04YU
scaffold52_17008	Mgen00379	Unique
scaffold52_17008	Mgen00389	Vertebrata	EOG091G07TS
scaffold52_17008	Mgen00488	Metazoa	EOG091G0EWX
scaffold52_17008	Mgen00490	Holometabola	EOG091G0KVX
scaffold52_17008	Mgen00518	Vertebrata	EOG091G0KT8
scaffold52_17008	Mgen00552	Unique
scaffold52_17008	Mgen00611	Unique
scaffold52_17008	Mgen00644	Vertebrata	EOG091G0FP3
scaffold52_17008	Mgen00742	Vertebrata	EOG091G1UGZ
scaffold52_17008	Mgen00847	Vertebrata	EOG091G0FG8
scaffold52_17008	Mgen00850	Vertebrata	EOG091G0FG8
scaffold52_17008	Mgen00875	Unique
scaffold52_17008	Mgen00985	Vertebrata	EOG091G0NE8
scaffold52_17008	Mgen01124	Vertebrata	EOG091G178I
scaffold52_17008	Mgen01131	Vertebrata	EOG091G0QR8
scaffold52_17008	Mgen01519	Vertebrata	EOG091G00X8
scaffold52_17008	Mgen01584	Vertebrata	EOG091G0CRR
scaffold52_17008	Mgen01624	Unique
scaffold52_17008	Mgen01627	Vertebrata	EOG091G0O1O
scaffold52_17008	Mgen01661	Vertebrata	EOG091G0BE7
scaffold52_17008	Mgen01684	Metazoa	EOG091G1AEF
scaffold52_17008	Mgen02037	Unique
scaffold52_17008	Mgen02142	Unique
scaffold52_17008	Mgen02167	Vertebrata	EOG091G0LEQ
scaffold52_17008	Mgen02222	Vertebrata	EOG091G0I86
scaffold52_17008	Mgen02292	Metazoa	EOG091G01ZI
scaffold52_17008	Mgen02541	Vertebrata	EOG091G0ODW
scaffold52_17008	Mgen02544	Unique
scaffold52_17008	Mgen02918	Vertebrata	EOG091G0Y4N
scaffold52_17008	Mgen03123	Vertebrata	EOG091G08H2
scaffold52_17008	Mgen03249	Vertebrata	EOG091G018S
scaffold52_17008	Mgen03547	Vertebrata	EOG091G09LW
scaffold52_17008	Mgen03576	Hymenoptera	EOG091G1415
scaffold52_17008	Mgen03625	Vertebrata	EOG091G1BEO
scaffold52_17008	Mgen03665	Vertebrata	EOG091G0SVY
scaffold52_17008	Mgen03740	Metazoa	EOG091G0AEA
scaffold52_17008	Mgen03859	Unique
scaffold52_17008	Mgen03892	Unique
scaffold52_17008	Mgen03912	Unique
scaffold52_17008	Mgen03949	Unique
scaffold52_17008	Mgen04041	Vertebrata	EOG091G0K9X
scaffold52_17008	Mgen04098	Unique
scaffold52_17008	Mgen04121	Unique
scaffold52_17008	Mgen04167	Vertebrata	EOG091G0M5C
scaffold52_17008	Mgen04183	Unique
scaffold52_17008	Mgen04255	Unique
scaffold52_17008	Mgen04310	Vertebrata	EOG091G0I8R
scaffold52_17008	Mgen04446	Vertebrata	EOG091G0170
scaffold52_17008	Mgen04473	Vertebrata	EOG091G060Y
scaffold52_17008	Mgen04524	Metazoa	EOG091G0J8Q
scaffold52_17008	Mgen04561	Vertebrata	EOG091G0YX6
scaffold52_17008	Mgen04681	Unique
scaffold52_17008	Mgen04840	Vertebrata	EOG091G0N7M
scaffold52_17008	Mgen04935	Unique
scaffold52_17008	Mgen05102	Vertebrata	EOG091G00Y0
scaffold52_17008	Mgen05277	Holometabola	EOG091G0UKN
scaffold52_17008	Mgen05363	Vertebrata	EOG091G0UHT
scaffold52_17008	Mgen05389	Unique
scaffold52_17008	Mgen05394	Vertebrata	EOG091G0QJA
scaffold52_17008	Mgen05449	Vertebrata	EOG091G05ZT
scaffold52_17008	Mgen05498	Vertebrata	EOG091G021J
scaffold52_17008	Mgen05557	Metazoa	EOG091G0131
scaffold52_17008	Mgen05616	Hymenoptera	EOG091G0X22
scaffold52_17008	Mgen05641	Unique
scaffold52_17008	Mgen05652	Unique
scaffold52_17008	Mgen05724	Vertebrata	EOG091G00FK
scaffold52_17008	Mgen05790	Vertebrata	EOG091G16CK
scaffold52_17008	Mgen05990	Unique
scaffold52_17008	Mgen05995	Vertebrata	EOG091G0Y4N
scaffold52_17008	Mgen06420	Unique
scaffold52_17008	Mgen06480	Vertebrata	EOG091G0AH5
scaffold52_17008	Mgen06515	Unique
scaffold52_17008	Mgen06531	Aculeata	EOG091G1AIR
scaffold52_17008	Mgen06677	Vertebrata	EOG091G0J8P
scaffold52_17008	Mgen06684	Vertebrata	EOG091G0MLF
scaffold52_17008	Mgen06732	Hymenoptera	EOG091G0GK9
scaffold52_17008	Mgen06989	Unique
scaffold52_17008	Mgen07050	Unique
scaffold52_17008	Mgen07110	Unique
scaffold52_17008	Mgen07142	Unique
scaffold52_17008	Mgen07213	Vertebrata	EOG091G0ODW
scaffold52_17008	Mgen07349	Vertebrata	EOG091G03BV
scaffold52_17008	Mgen07431	Unique
scaffold52_17008	Mgen07556	Vertebrata	EOG091G0Y4N
scaffold52_17008	Mgen07678	Hymenoptera	EOG091G18LB
scaffold52_17008	Mgen07913	Vertebrata	EOG091G0RSF
scaffold52_17008	Mgen07926	Vertebrata	EOG091G0FJH
scaffold52_17008	Mgen08079	Metazoa	EOG091G07Y8
scaffold52_17008	Mgen08089	Unique
scaffold52_17008	Mgen08091	Hymenoptera	EOG091G0CG2
scaffold52_17008	Mgen08173	Unique
scaffold52_17008	Mgen08351	Metazoa	EOG091G0YB9
scaffold52_17008	Mgen08455	Vertebrata	EOG091G0DF0
scaffold52_17008	Mgen08570	Vertebrata	EOG091G0Y4N
scaffold52_17008	Mgen08607	Vertebrata	EOG091G02KC
scaffold52_17008	Mgen08630	Unique
scaffold52_17008	Mgen08781	Vertebrata	EOG091G07OC
scaffold52_17008	Mgen08784	Vertebrata	EOG091G135G
scaffold52_17008	Mgen08975	Unique
scaffold52_17008	Mgen09243	Vertebrata	EOG091G0UP6
scaffold52_17008	Mgen09428	Vertebrata	EOG091G0Y4N
scaffold52_17008	Mgen09431	Vertebrata	EOG091G0571
scaffold52_17008	Mgen09561	Vertebrata	EOG091G05AE
scaffold52_17008	Mgen09587	Vertebrata	EOG091G0ID2
scaffold52_17008	Mgen09610	Vertebrata	EOG091G0I6K
scaffold52_17008	Mgen09648	Unique
scaffold52_17008	Mgen09880	Metazoa	EOG091G0PZK
scaffold52_17008	Mgen09896	Vertebrata	EOG091G062W
scaffold52_17008	Mgen10114	Unique
scaffold52_17008	Mgen10125	Unique
scaffold52_17008	Mgen10168	Vertebrata	EOG091G0C54
scaffold52_17008	Mgen10344	Vertebrata	EOG091G04EX
scaffold52_17008	Mgen10402	Vertebrata	EOG091G0QJA
scaffold52_17008	Mgen10488	Vertebrata	EOG091G0Y4N
scaffold52_17008	Mgen10503	Unique
scaffold52_17008	Mgen10504	Vertebrata	EOG091G0Y4N
scaffold52_17008	Mgen10629	Vertebrata	EOG091G05MY
scaffold52_17008	Mgen10664	Vertebrata	EOG091G01DB
scaffold52_17008	Mgen10725	Vertebrata	EOG091G0D30
scaffold52_17008	Mgen10834	Insecta	EOG091G0B7O
scaffold52_17008	Mgen11073	Vertebrata	EOG091G0F2B
scaffold52_17008	Mgen11082	Unique
scaffold52_17008	Mgen11158	Insecta	EOG091G03QG
scaffold52_17008	Mgen11198	Arthropoda	EOG091G06UT
scaffold52_17008	Mgen11218	Vertebrata	EOG091G0Y4N
scaffold52_17008	Mgen11235	Unique
scaffold52_17008	Mgen11277	Vertebrata	EOG091G0Y4N
scaffold52_17008	Mgen11426	Vertebrata	EOG091G0UHT
scaffold52_17008	Mgen11479	Vertebrata	EOG091G0XRQ
scaffold52_17008	Mgen11521	Vertebrata	EOG091G0UNU
scaffold52_17008	Mgen11550	Vertebrata	EOG091G064P
scaffold52_17008	Mgen11735	Vertebrata	EOG091G0QST
scaffold52_17008	Mgen11798	Vertebrata	EOG091G05HA
scaffold52_17008	Mgen11845	Vertebrata	EOG091G0Y4N
scaffold52_17008	Mgen11891	Vertebrata	EOG091G06VI
scaffold52_17008	Mgen11919	Vertebrata	EOG091G0Y4N
scaffold52_17008	Mgen12179	Vertebrata	EOG091G0Y4N
scaffold52_17008	Mgen12182	Vertebrata	EOG091G06RP
scaffold52_17008	Mgen12186	Vertebrata	EOG091G0Y4N
scaffold52_17008	Mgen12222	Vertebrata	EOG091G0I1O
scaffold52_17008	Mgen12251	Vertebrata	EOG091G0IZP
scaffold52_17008	Mgen12273	Unique
scaffold52_17008	Mgen12374	Vertebrata	EOG091G0QGU
scaffold52_17008	Mgen12502	Unique
scaffold52_17008	Mgen12515	Vertebrata	EOG091G06FQ
scaffold52_17008	Mgen12698	Vertebrata	EOG091G0A8V
scaffold52_17008	Mgen12717	Vertebrata	EOG091G0RNX
scaffold52_17008	Mgen12740	Vertebrata	EOG091G0J5T
scaffold52_17008	Mgen12785	Vertebrata	EOG091G0LGG
scaffold52_17008	Mgen12841	Unique
scaffold68_30422	Mgen00186	Aculeata	EOG091G10DD
scaffold68_30422	Mgen00196	Hymenoptera	EOG091G12O1
scaffold68_30422	Mgen00341	Vertebrata	EOG091G0BY8
scaffold68_30422	Mgen00474	Vertebrata	EOG091G0AH5
scaffold68_30422	Mgen00475	Vertebrata	EOG091G0OTP
scaffold68_30422	Mgen00487	Unique
scaffold68_30422	Mgen00852	Vertebrata	EOG091G0FG8
scaffold68_30422	Mgen00869	Insecta	EOG091G02P8
scaffold68_30422	Mgen00957	Hymenoptera	EOG091G0DVO
scaffold68_30422	Mgen01024	Insecta	EOG091G130V
scaffold68_30422	Mgen01116	Metazoa	EOG091G0T02
scaffold68_30422	Mgen01255	Metazoa	EOG091G01JJ
scaffold68_30422	Mgen01372	Vertebrata	EOG091G0UHT
scaffold68_30422	Mgen01548	Vertebrata	EOG091G03M1
scaffold68_30422	Mgen01575	Vertebrata	EOG091G0B5S
scaffold68_30422	Mgen01581	Vertebrata	EOG091G0Y4N
scaffold68_30422	Mgen01588	Arthropoda	EOG091G060T
scaffold68_30422	Mgen01686	Vertebrata	EOG091G0FHS
scaffold68_30422	Mgen01772	Unique
scaffold68_30422	Mgen01956	Vertebrata	EOG091G0N90
scaffold68_30422	Mgen02075	Unique
scaffold68_30422	Mgen02079	Unique
scaffold68_30422	Mgen02133	Unique
scaffold68_30422	Mgen02197	Unique
scaffold68_30422	Mgen02230	Vertebrata	EOG091G048U
scaffold68_30422	Mgen02269	Vertebrata	EOG091G00RB
scaffold68_30422	Mgen02301	Vertebrata	EOG091G05AE
scaffold68_30422	Mgen02346	Vertebrata	EOG091G147N
scaffold68_30422	Mgen02425	Metazoa	EOG091G08UI
scaffold68_30422	Mgen02524	Unique
scaffold68_30422	Mgen02536	Vertebrata	EOG091G1600
scaffold68_30422	Mgen02565	Vertebrata	EOG091G01FL
scaffold68_30422	Mgen02567	Vertebrata	EOG091G0761
scaffold68_30422	Mgen02587	Unique
scaffold68_30422	Mgen02627	Vertebrata	EOG091G0FJM
scaffold68_30422	Mgen02670	Vertebrata	EOG091G00LW
scaffold68_30422	Mgen02674	Vertebrata	EOG091G07YQ
scaffold68_30422	Mgen02740	Vertebrata	EOG091G03E1
scaffold68_30422	Mgen02752	Metazoa	EOG091G03QN
scaffold68_30422	Mgen02849	Vertebrata	EOG091G06OV
scaffold68_30422	Mgen02963	Metazoa	EOG091G0RJB
scaffold68_30422	Mgen02975	Vertebrata	EOG091G08YE
scaffold68_30422	Mgen03019	Vertebrata	EOG091G0DHL
scaffold68_30422	Mgen03379	Vertebrata	EOG091G0CQO
scaffold68_30422	Mgen03480	Unique
scaffold68_30422	Mgen03481	Vertebrata	EOG091G0342
scaffold68_30422	Mgen03497	Unique
scaffold68_30422	Mgen03553	Vertebrata	EOG091G0L7F
scaffold68_30422	Mgen03625	Vertebrata	EOG091G1BEO
scaffold68_30422	Mgen03729	Unique
scaffold68_30422	Mgen03784	Vertebrata	EOG091G0LUY
scaffold68_30422	Mgen03785	Unique
scaffold68_30422	Mgen03786	Vertebrata	EOG091G0EKD
scaffold68_30422	Mgen03797	Apoidea	EOG091G173H
scaffold68_30422	Mgen04036	Vertebrata	EOG091G021M
scaffold68_30422	Mgen04076	Vertebrata	EOG091G0QJA
scaffold68_30422	Mgen04080	Unique
scaffold68_30422	Mgen04087	Unique
scaffold68_30422	Mgen04232	Vertebrata	EOG091G0M5C
scaffold68_30422	Mgen04267	Vertebrata	EOG091G0Y4N
scaffold68_30422	Mgen04279	Metazoa	EOG091G0M1G
scaffold68_30422	Mgen04322	Vertebrata	EOG091G09K6
scaffold68_30422	Mgen04327	Vertebrata	EOG091G0AUR
scaffold68_30422	Mgen04446	Vertebrata	EOG091G0170
scaffold68_30422	Mgen04450	Apoidea	EOG091G0S8W
scaffold68_30422	Mgen04452	Vertebrata	EOG091G00VX
scaffold68_30422	Mgen04496	Vertebrata	EOG091G0KCU
scaffold68_30422	Mgen04524	Metazoa	EOG091G0J8Q
scaffold68_30422	Mgen04538	Vertebrata	EOG091G02UO
scaffold68_30422	Mgen04559	Vertebrata	EOG091G0Y4N
scaffold68_30422	Mgen04562	Unique
scaffold68_30422	Mgen04567	Unique
scaffold68_30422	Mgen04623	Vertebrata	EOG091G0YTM
scaffold68_30422	Mgen04746	Unique
scaffold68_30422	Mgen04751	Unique
scaffold68_30422	Mgen04753	Vertebrata	EOG091G09XD
scaffold68_30422	Mgen04949	Vertebrata	EOG091G09M0
scaffold68_30422	Mgen04951	Vertebrata	EOG091G0HZ0
scaffold68_30422	Mgen04971	Insecta	EOG091G03UJ
scaffold68_30422	Mgen05166	Unique
scaffold68_30422	Mgen05332	Vertebrata	EOG091G0Y4N
scaffold68_30422	Mgen05365	Aculeata	EOG091G0ZQD
scaffold68_30422	Mgen05464	Vertebrata	EOG091G0I4G
scaffold68_30422	Mgen05493	Vertebrata	EOG091G0SBH
scaffold68_30422	Mgen05618	Unique
scaffold68_30422	Mgen05805	Vertebrata	EOG091G0137
scaffold68_30422	Mgen05829	Vertebrata	EOG091G0APX
scaffold68_30422	Mgen06054	Vertebrata	EOG091G14DP
scaffold68_30422	Mgen06140	Vertebrata	EOG091G0QTB
scaffold68_30422	Mgen06212	Unique
scaffold68_30422	Mgen06673	Unique
scaffold68_30422	Mgen06693	Unique
scaffold68_30422	Mgen06711	Vertebrata	EOG091G0K6X
scaffold68_30422	Mgen06720	Vertebrata	EOG091G0BDT
scaffold68_30422	Mgen06928	Unique
scaffold68_30422	Mgen06941	Vertebrata	EOG091G0N9R
scaffold68_30422	Mgen06954	Vertebrata	EOG091G05Y8
scaffold68_30422	Mgen07168	Metazoa	EOG091G02UY
scaffold68_30422	Mgen07309	Unique
scaffold68_30422	Mgen07574	Vertebrata	EOG091G0OXR
scaffold68_30422	Mgen07865	Hymenoptera	EOG091G0TO5
scaffold68_30422	Mgen07902	Unique
scaffold68_30422	Mgen07934	Vertebrata	EOG091G0Y4N
scaffold68_30422	Mgen08108	Metazoa	EOG091G0NEP
scaffold68_30422	Mgen08143	Insecta	EOG091G0YOM
scaffold68_30422	Mgen08165	Vertebrata	EOG091G02PO
scaffold68_30422	Mgen08368	Unique
scaffold68_30422	Mgen08430	Unique
scaffold68_30422	Mgen08550	Hymenoptera	EOG091G0PMJ
scaffold68_30422	Mgen08687	Arthropoda	EOG091G17HI
scaffold68_30422	Mgen08709	Metazoa	EOG091G0D29
scaffold68_30422	Mgen08710	Unique
scaffold68_30422	Mgen08712	Vertebrata	EOG091G0CY8
scaffold68_30422	Mgen08765	Metazoa	EOG091G00OG
scaffold68_30422	Mgen08769	Vertebrata	EOG091G03H8
scaffold68_30422	Mgen08915	Vertebrata	EOG091G0KBE
scaffold68_30422	Mgen09111	Vertebrata	EOG091G037Q
scaffold68_30422	Mgen09237	Vertebrata	EOG091G01IQ
scaffold68_30422	Mgen09275	Metazoa	EOG091G08GQ
scaffold68_30422	Mgen09276	Unique
scaffold68_30422	Mgen09278	Vertebrata	EOG091G0GC2
scaffold68_30422	Mgen09281	Vertebrata	EOG091G065I
scaffold68_30422	Mgen09516	Vertebrata	EOG091G015R
scaffold68_30422	Mgen09539	Insecta	EOG091G0L21
scaffold68_30422	Mgen09601	Vertebrata	EOG091G0G4S
scaffold68_30422	Mgen09635	Unique
scaffold68_30422	Mgen09663	Vertebrata	EOG091G0A6V
scaffold68_30422	Mgen09667	Vertebrata	EOG091G019X
scaffold68_30422	Mgen09833	Vertebrata	EOG091G0H74
scaffold68_30422	Mgen09898	Vertebrata	EOG091G08NG
scaffold68_30422	Mgen10053	Vertebrata	EOG091G0P1V
scaffold68_30422	Mgen10468	Vertebrata	EOG091G0KT8
scaffold68_30422	Mgen10472	Insecta	EOG091G0E55
scaffold68_30422	Mgen10536	Unique
scaffold68_30422	Mgen10557	Vertebrata	EOG091G004C
scaffold68_30422	Mgen10592	Metazoa	EOG091G076V
scaffold68_30422	Mgen10855	Vertebrata	EOG091G01XQ
scaffold68_30422	Mgen10880	Vertebrata	EOG091G0Y4N
scaffold68_30422	Mgen10929	Vertebrata	EOG091G024S
scaffold68_30422	Mgen10955	Vertebrata	EOG091G0SCS
scaffold68_30422	Mgen11053	Vertebrata	EOG091G0FEB
scaffold68_30422	Mgen11094	Unique
scaffold68_30422	Mgen11124	Unique
scaffold68_30422	Mgen11170	Unique
scaffold68_30422	Mgen11492	Metazoa	EOG091G0LUA
scaffold68_30422	Mgen11493	Unique
scaffold68_30422	Mgen11624	Unique
scaffold68_30422	Mgen11719	Vertebrata	EOG091G0XRQ
scaffold68_30422	Mgen11911	Metazoa	EOG091G0087
scaffold68_30422	Mgen11958	Unique
scaffold68_30422	Mgen12100	Vertebrata	EOG091G00AA
scaffold68_30422	Mgen12103	Vertebrata	EOG091G15X5
scaffold68_30422	Mgen12177	Apoidea	EOG091G07W8
scaffold68_30422	Mgen12181	Unique
scaffold68_30422	Mgen12207	Metazoa	EOG091G02WX
scaffold68_30422	Mgen12210	Vertebrata	EOG091G0TKO
scaffold68_30422	Mgen12243	Vertebrata	EOG091G0QJA
scaffold68_30422	Mgen12321	Vertebrata	EOG091G050S
scaffold68_30422	Mgen12391	Metazoa	EOG091G00UE
scaffold68_30422	Mgen12418	Unique
scaffold68_30422	Mgen12603	Unique
scaffold68_30422	Mgen12620	Vertebrata	EOG091G0HW9
scaffold68_30422	Mgen12717	Vertebrata	EOG091G0RNX
scaffold68_30422	Mgen12807	Vertebrata	EOG091G0FWN
scaffold68_30422	Mgen12856	Vertebrata	EOG091G0S4E
scaffold68_30422	Mgen12860	Vertebrata	EOG091G00KX
scaffold71_6431	Mgen00388	Vertebrata	EOG091G0RNV
scaffold71_6431	Mgen00494	Vertebrata	EOG091G0L51
scaffold71_6431	Mgen01233	Unique
scaffold71_6431	Mgen01371	Vertebrata	EOG091G07ZM
scaffold71_6431	Mgen02090	Vertebrata	EOG091G0Y4N
scaffold71_6431	Mgen03114	Vertebrata	EOG091G0N0A
scaffold71_6431	Mgen04235	Vertebrata	EOG091G0Y4N
scaffold71_6431	Mgen05263	Vertebrata	EOG091G01C4
scaffold71_6431	Mgen06524	Vertebrata	EOG091G0LVA
scaffold71_6431	Mgen06753	Vertebrata	EOG091G0KXZ
scaffold71_6431	Mgen09693	Vertebrata	EOG091G11T4
scaffold71_6431	Mgen10555	Vertebrata	EOG091G0XR1
scaffold71_6431	Mgen12096	Vertebrata	EOG091G03KI
scaffold9_33563	Mgen00369	Vertebrata	EOG091G04YU
scaffold9_33563	Mgen00396	Vertebrata	EOG091G0K3F
scaffold9_33563	Mgen00488	Metazoa	EOG091G0EWX
scaffold9_33563	Mgen00492	Vertebrata	EOG091G01KS
scaffold9_33563	Mgen00985	Vertebrata	EOG091G0NE8
scaffold9_33563	Mgen01640	Vertebrata	EOG091G04AM
scaffold9_33563	Mgen02142	Unique
scaffold9_33563	Mgen02768	Vertebrata	EOG091G0AYY
scaffold9_33563	Mgen03123	Vertebrata	EOG091G08H2
scaffold9_33563	Mgen03665	Vertebrata	EOG091G0SVY
scaffold9_33563	Mgen03892	Unique
scaffold9_33563	Mgen03912	Unique
scaffold9_33563	Mgen04167	Vertebrata	EOG091G0M5C
scaffold9_33563	Mgen04446	Vertebrata	EOG091G0170
scaffold9_33563	Mgen04562	Unique
scaffold9_33563	Mgen05027	Vertebrata	EOG091G031C
scaffold9_33563	Mgen05037	Vertebrata	EOG091G0F5N
scaffold9_33563	Mgen05498	Vertebrata	EOG091G021J
scaffold9_33563	Mgen05616	Hymenoptera	EOG091G0X22
scaffold9_33563	Mgen06420	Unique
scaffold9_33563	Mgen06480	Vertebrata	EOG091G0AH5
scaffold9_33563	Mgen06532	Unique
scaffold9_33563	Mgen06677	Vertebrata	EOG091G0J8P
scaffold9_33563	Mgen06732	Hymenoptera	EOG091G0GK9
scaffold9_33563	Mgen06934	Vertebrata	EOG091G0ODW
scaffold9_33563	Mgen07110	Unique
scaffold9_33563	Mgen07213	Vertebrata	EOG091G0ODW
scaffold9_33563	Mgen08079	Metazoa	EOG091G07Y8
scaffold9_33563	Mgen08091	Hymenoptera	EOG091G0CG2
scaffold9_33563	Mgen08544	Unique
scaffold9_33563	Mgen08570	Vertebrata	EOG091G0Y4N
scaffold9_33563	Mgen09502	Vertebrata	EOG091G0D21
scaffold9_33563	Mgen09610	Vertebrata	EOG091G0I6K
scaffold9_33563	Mgen09648	Unique
scaffold9_33563	Mgen09896	Vertebrata	EOG091G062W
scaffold9_33563	Mgen09909	Vertebrata	EOG091G0J6C
scaffold9_33563	Mgen10168	Vertebrata	EOG091G0C54
scaffold9_33563	Mgen10533	Vertebrata	EOG091G0070
scaffold9_33563	Mgen10629	Vertebrata	EOG091G05MY
scaffold9_33563	Mgen11158	Insecta	EOG091G03QG
scaffold9_33563	Mgen11198	Arthropoda	EOG091G06UT
scaffold9_33563	Mgen11218	Vertebrata	EOG091G0Y4N
scaffold9_33563	Mgen11277	Vertebrata	EOG091G0Y4N
scaffold9_33563	Mgen11521	Vertebrata	EOG091G0UNU
scaffold9_33563	Mgen11796	Vertebrata	EOG091G0A5O
scaffold9_33563	Mgen11932	Metazoa	EOG091G092T

## Sheet: mrot_lin_spec_targets
miR_ID	Target_gene_ID	Orthogroup_age	Orthogroup_ID
GL985710_1382	Mrot01415	Vertebrata	EOG091G0JNC
GL985710_1382	Mrot04809	Vertebrata	EOG091G00GK
GL985710_1382	Mrot08288	Vertebrata	EOG091G12OH
GL985710_1382	Mrot08468	Unique
GL985710_1382	Mrot09035	Vertebrata	EOG091G0DQP
GL985710_1382	Mrot09101	Vertebrata	EOG091G0VWN
GL985710_1448	Mrot00548	Apoidea	EOG091G1TBV
GL985710_1448	Mrot09198	Vertebrata	EOG091G14BD
GL985743_4068	Mrot02474	Metazoa	EOG091G0WDP
GL985748_4609	Mrot02878	Vertebrata	EOG091G0BNE
GL985748_4609	Mrot03743	Vertebrata	EOG091G0236
GL985748_4609	Mrot03906	Vertebrata	EOG091G0CYG
GL985748_4609	Mrot04524	Vertebrata	EOG091G024C
GL985748_4609	Mrot04855	Unique
GL985748_4609	Mrot04958	Metazoa	EOG091G12RF
GL985748_4609	Mrot06135	Holometabola	EOG091G1TGR
GL985748_4609	Mrot06565	Aculeata	EOG091G1N1H
GL985748_4609	Mrot07267	Vertebrata	EOG091G0QT3
GL985748_4609	Mrot08243	Vertebrata	EOG091G1600
GL985748_4609	Mrot08781	Vertebrata	EOG091G0OQE
GL985748_4609	Mrot08810	Vertebrata	EOG091G0H1T
GL985748_4609	Mrot09286	Arthropoda	EOG091G1WN6
GL985748_4609	Mrot09651	Vertebrata	EOG091G1CCJ
GL985748_4609	Mrot09677	Unique
GL985748_4609	Mrot10459	Vertebrata	EOG091G0YD1
GL985748_4609	Mrot11132	Metazoa	EOG091G01JE
GL985748_4609	Mrot12485	Vertebrata	EOG091G00ZX
GL985748_4609	Mrot13357	Metazoa	EOG091G09W2
GL985753_5061	Mrot01073	Vertebrata	EOG091G0Y4N
GL985753_5061	Mrot02933	Unique
GL985753_5061	Mrot04838	Unique
GL985753_5061	Mrot05730	Vertebrata	EOG091G0T5O
GL985753_5061	Mrot11973	Vertebrata	EOG091G0D69
GL985753_5061	Mrot12196	Vertebrata	EOG091G061L
GL985753_5061	Mrot12421	Vertebrata	EOG091G0341
GL985776_6048	Mrot01318	Unique
GL985776_6048	Mrot02934	Vertebrata	EOG091G0594
GL985776_6048	Mrot05563	Vertebrata	EOG091G0GX6
GL985776_6048	Mrot05669	Unique
GL985776_6048	Mrot08091	Metazoa	EOG091G0WEP
GL985776_6048	Mrot09283	Unique
GL985780_6280	Mrot00375	Unique
GL985780_6280	Mrot00392	Vertebrata	EOG091G1600
GL985780_6280	Mrot00823	Unique
GL985780_6280	Mrot01000	Vertebrata	EOG091G1600
GL985780_6280	Mrot01714	Unique
GL985780_6280	Mrot02080	Unique
GL985780_6280	Mrot02107	Vertebrata	EOG091G0XIA
GL985780_6280	Mrot02224	Unique
GL985780_6280	Mrot02314	Unique
GL985780_6280	Mrot02533	Vertebrata	EOG091G05AI
GL985780_6280	Mrot02918	Arthropoda	EOG091G0Z0F
GL985780_6280	Mrot03247	Vertebrata	EOG091G07TH
GL985780_6280	Mrot03425	Vertebrata	EOG091G0XK1
GL985780_6280	Mrot03942	Vertebrata	EOG091G0JM9
GL985780_6280	Mrot03980	Vertebrata	EOG091G02MV
GL985780_6280	Mrot04056	Vertebrata	EOG091G1600
GL985780_6280	Mrot04343	Metazoa	EOG091G05CH
GL985780_6280	Mrot05661	Unique
GL985780_6280	Mrot05668	Vertebrata	EOG091G0CLA
GL985780_6280	Mrot05737	Vertebrata	EOG091G07TH
GL985780_6280	Mrot05738	Vertebrata	EOG091G1600
GL985780_6280	Mrot05862	Unique
GL985780_6280	Mrot05893	Vertebrata	EOG091G09D3
GL985780_6280	Mrot06524	Vertebrata	EOG091G07TH
GL985780_6280	Mrot06532	Metazoa	EOG091G0K91
GL985780_6280	Mrot06852	Vertebrata	EOG091G01X4
GL985780_6280	Mrot08039	Vertebrata	EOG091G12OH
GL985780_6280	Mrot08697	Unique
GL985780_6280	Mrot08719	Vertebrata	EOG091G0XK1
GL985780_6280	Mrot08768	Vertebrata	EOG091G02QS
GL985780_6280	Mrot09423	Unique
GL985780_6280	Mrot10900	Vertebrata	EOG091G11NW
GL985780_6280	Mrot11176	Vertebrata	EOG091G00W2
GL985780_6280	Mrot11553	Vertebrata	EOG091G00RM
GL985780_6280	Mrot12014	Vertebrata	EOG091G0LY2
GL985780_6280	Mrot12389	Vertebrata	EOG091G1600
GL985780_6280	Mrot12495	Hymenoptera	EOG091G073N
GL985780_6280	Mrot12510	Vertebrata	EOG091G015R
GL985780_6280	Mrot12951	Vertebrata	EOG091G0UNU
GL985780_6280	Mrot13278	Vertebrata	EOG091G00W2
GL985780_6280	Mrot13366	Vertebrata	EOG091G0CO6
GL985780_6280	Mrot13367	Vertebrata	EOG091G09S6
GL985795_7264	Mrot00449	Vertebrata	EOG091G018J
GL985795_7264	Mrot06164	Unique
GL985795_7264	Mrot12950	Vertebrata	EOG091G09D3
GL985801_7603	Mrot01066	Vertebrata	EOG091G0J2A
GL985801_7603	Mrot05921	Hymenoptera	EOG091G0EEE
GL985801_7603	Mrot07527	Vertebrata	EOG091G000N
GL985801_7603	Mrot10682	Metazoa	EOG091G0RXL
GL985803_8200	Mrot02756	Vertebrata	EOG091G0Q21
GL985803_8200	Mrot05689	Arthropoda	EOG091G0SQC
GL985818_9482	Mrot00501	Vertebrata	EOG091G04V7
GL985818_9482	Mrot00715	Vertebrata	EOG091G0QZJ
GL985818_9482	Mrot08660	Vertebrata	EOG091G18QW
GL985818_9482	Mrot10855	Vertebrata	EOG091G07DM
GL985818_9482	Mrot12224	Vertebrata	EOG091G0TAU
GL985880_12190	Mrot00176	Metazoa	EOG091G116A
GL985880_12190	Mrot01121	Unique
GL985880_12190	Mrot01151	Aculeata	EOG091G1D4L
GL985880_12190	Mrot01187	Vertebrata	EOG091G049U
GL985880_12190	Mrot01239	Unique
GL985880_12190	Mrot01712	Unique
GL985880_12190	Mrot02765	Apoidea	EOG091G1RS8
GL985880_12190	Mrot02927	Metazoa	EOG091G04FD
GL985880_12190	Mrot03155	Vertebrata	EOG091G0CS5
GL985880_12190	Mrot03389	Unique
GL985880_12190	Mrot03599	Vertebrata	EOG091G12MK
GL985880_12190	Mrot03796	Vertebrata	EOG091G11A0
GL985880_12190	Mrot03870	Vertebrata	EOG091G0LKW
GL985880_12190	Mrot03881	Unique
GL985880_12190	Mrot03906	Vertebrata	EOG091G0CYG
GL985880_12190	Mrot04177	Insecta	EOG091G0AAB
GL985880_12190	Mrot04217	Unique
GL985880_12190	Mrot04227	Vertebrata	EOG091G12OH
GL985880_12190	Mrot04355	Metazoa	EOG091G0D6X
GL985880_12190	Mrot04761	Arthropoda	EOG091G0I95
GL985880_12190	Mrot05057	Unique
GL985880_12190	Mrot05310	Unique
GL985880_12190	Mrot05320	Metazoa	EOG091G083G
GL985880_12190	Mrot05441	Unique
GL985880_12190	Mrot05781	Vertebrata	EOG091G06VI
GL985880_12190	Mrot05908	Vertebrata	EOG091G02KC
GL985880_12190	Mrot06156	Unique
GL985880_12190	Mrot06328	Vertebrata	EOG091G0GUM
GL985880_12190	Mrot06717	Vertebrata	EOG091G18Z5
GL985880_12190	Mrot06892	Vertebrata	EOG091G00V3
GL985880_12190	Mrot07027	Unique
GL985880_12190	Mrot07378	Metazoa	EOG091G199R
GL985880_12190	Mrot07381	Unique
GL985880_12190	Mrot07537	Vertebrata	EOG091G0LLE
GL985880_12190	Mrot07594	Unique
GL985880_12190	Mrot08238	Arthropoda	EOG091G032D
GL985880_12190	Mrot09265	Vertebrata	EOG091G0B8J
GL985880_12190	Mrot09752	Vertebrata	EOG091G0MUU
GL985880_12190	Mrot11310	Unique
GL985880_12190	Mrot12460	Vertebrata	EOG091G17J0
GL985995_15875	Mrot00592	Vertebrata	EOG091G07C8
GL985995_15875	Mrot00755	Unique
GL985995_15875	Mrot00777	Vertebrata	EOG091G01X4
GL985995_15875	Mrot01127	Hymenoptera	EOG091G12UN
GL985995_15875	Mrot02808	Metazoa	EOG091G0MLC
GL985995_15875	Mrot03959	Vertebrata	EOG091G0S4E
GL985995_15875	Mrot05256	Vertebrata	EOG091G1B03
GL985995_15875	Mrot06618	Vertebrata	EOG091G12OH
GL985995_15875	Mrot06759	Vertebrata	EOG091G12OH
GL985995_15875	Mrot07133	Unique
GL985995_15875	Mrot09667	Vertebrata	EOG091G0Z4E
GL985995_15875	Mrot10941	Vertebrata	EOG091G17TT
GL985995_15875	Mrot12812	Vertebrata	EOG091G06OV
GL986007_16547	Mrot10685	Vertebrata	EOG091G0MUU
GL986007_16547	Mrot12608	Vertebrata	EOG091G0L72
GL986040_17568	Mrot13302	Vertebrata	EOG091G07S9
GL986064_18863	Mrot10549	Vertebrata	EOG091G0XLE
GL986315_22312	Mrot03304	Unique
GL986315_22312	Mrot09304	Metazoa	EOG091G03Q7
GL986702_25113	Mrot00132	Unique
GL986702_25113	Mrot01161	Metazoa	EOG091G0GIX
GL986702_25113	Mrot01621	Vertebrata	EOG091G0WNB
GL986702_25113	Mrot02256	Vertebrata	EOG091G07TH
GL986702_25113	Mrot02534	Vertebrata	EOG091G0I39
GL986702_25113	Mrot05553	Vertebrata	EOG091G01WG
GL986702_25113	Mrot06417	Vertebrata	EOG091G05HI
GL986702_25113	Mrot06529	Vertebrata	EOG091G02BA
GL986702_25113	Mrot09298	Vertebrata	EOG091G0EU0
GL986702_25113	Mrot09443	Unique
GL986702_25113	Mrot09534	Unique
GL986702_25113	Mrot10354	Vertebrata	EOG091G026C
GL986702_25113	Mrot10414	Vertebrata	EOG091G0M24
GL986702_25113	Mrot11517	Vertebrata	EOG091G0I1O
GL986702_25113	Mrot12300	Vertebrata	EOG091G0J4P

## Sheet: nmel_lin_spec_targets
miR_ID	Target_gene_ID	Orthogroup_age	Orthogroup_ID
scaffold1185_cov66_11642	Nmel02568	Vertebrata	EOG091G0RSV
scaffold1185_cov66_11642	Nmel02754	Insecta	EOG091G11CC
scaffold1185_cov66_11642	Nmel02919	Vertebrata	EOG091G04PA
scaffold1185_cov66_11642	Nmel02961	Vertebrata	EOG091G04PN
scaffold1185_cov66_11642	Nmel03177	Vertebrata	EOG091G08WX
scaffold1185_cov66_11642	Nmel09354	Vertebrata	EOG091G04OW
scaffold1185_cov66_11642	Nmel10175	Vertebrata	EOG091G0M9L
scaffold1185_cov66_11642	Nmel10432	Metazoa	EOG091G0MPB
scaffold1209_cov63_12234	Nmel02793	Arthropoda	EOG091G0X4C
scaffold1209_cov63_12234	Nmel03996	Vertebrata	EOG091G0966
scaffold1209_cov63_12234	Nmel06036	Vertebrata	EOG091G0NG6
scaffold1209_cov63_12234	Nmel06329	Vertebrata	EOG091G0AXC
scaffold1209_cov63_12234	Nmel07541	Vertebrata	EOG091G080M
scaffold1209_cov63_12234	Nmel09306	Vertebrata	EOG091G0Y4N
scaffold1232_cov54_12436	Nmel01661	Vertebrata	EOG091G07NK
scaffold1232_cov54_12436	Nmel04707	Vertebrata	EOG091G02HJ
scaffold1232_cov54_12436	Nmel05182	Vertebrata	EOG091G0R50
scaffold1232_cov54_12436	Nmel06245	Unique
scaffold1232_cov54_12436	Nmel06377	Vertebrata	EOG091G11T4
scaffold1232_cov54_12436	Nmel06669	Unique
scaffold1232_cov54_12436	Nmel06969	Arthropoda	EOG091G1BID
scaffold1232_cov54_12436	Nmel07731	Apoidea	EOG091G1VGO
scaffold1232_cov54_12436	Nmel08585	Vertebrata	EOG091G07OC
scaffold1232_cov54_12436	Nmel10759	Unique
scaffold1472_cov65_13177	Nmel01979	Vertebrata	EOG091G0A1B
scaffold1472_cov65_13177	Nmel03162	Vertebrata	EOG091G0XMQ
scaffold1472_cov65_13177	Nmel07405	Vertebrata	EOG091G06U2
scaffold1564_cov63_13381	Nmel00120	Aculeata	EOG091G18MT
scaffold1564_cov63_13381	Nmel02078	Unique
scaffold1564_cov63_13381	Nmel02571	Vertebrata	EOG091G049U
scaffold1564_cov63_13381	Nmel04678	Vertebrata	EOG091G08HY
scaffold1564_cov63_13381	Nmel10772	Vertebrata	EOG091G00GN
scaffold1597_cov65_14100	Nmel00177	Vertebrata	EOG091G00JL
scaffold1597_cov65_14100	Nmel00295	Vertebrata	EOG091G0FLO
scaffold1597_cov65_14100	Nmel00735	Vertebrata	EOG091G0MUU
scaffold1597_cov65_14100	Nmel00771	Unique
scaffold1597_cov65_14100	Nmel00822	Vertebrata	EOG091G0CB5
scaffold1597_cov65_14100	Nmel00994	Insecta	EOG091G0KHD
scaffold1597_cov65_14100	Nmel01013	Vertebrata	EOG091G0LZK
scaffold1597_cov65_14100	Nmel01358	Metazoa	EOG091G0077
scaffold1597_cov65_14100	Nmel01443	Vertebrata	EOG091G07M3
scaffold1597_cov65_14100	Nmel01672	Unique
scaffold1597_cov65_14100	Nmel01827	Vertebrata	EOG091G01LV
scaffold1597_cov65_14100	Nmel02080	Unique
scaffold1597_cov65_14100	Nmel02123	Aculeata	EOG091G1BOJ
scaffold1597_cov65_14100	Nmel02163	Vertebrata	EOG091G01IQ
scaffold1597_cov65_14100	Nmel02253	Vertebrata	EOG091G0QR8
scaffold1597_cov65_14100	Nmel02468	Vertebrata	EOG091G02ZT
scaffold1597_cov65_14100	Nmel02503	Metazoa	EOG091G0A3S
scaffold1597_cov65_14100	Nmel02509	Unique
scaffold1597_cov65_14100	Nmel02575	Vertebrata	EOG091G0QR8
scaffold1597_cov65_14100	Nmel02669	Vertebrata	EOG091G0825
scaffold1597_cov65_14100	Nmel02788	Arthropoda	EOG091G0KTY
scaffold1597_cov65_14100	Nmel02975	Unique
scaffold1597_cov65_14100	Nmel02983	Apoidea	EOG091G0X5L
scaffold1597_cov65_14100	Nmel03074	Vertebrata	EOG091G049R
scaffold1597_cov65_14100	Nmel03214	Vertebrata	EOG091G062W
scaffold1597_cov65_14100	Nmel03250	Metazoa	EOG091G01A0
scaffold1597_cov65_14100	Nmel03311	Vertebrata	EOG091G0KRZ
scaffold1597_cov65_14100	Nmel03369	Vertebrata	EOG091G066I
scaffold1597_cov65_14100	Nmel03386	Vertebrata	EOG091G032A
scaffold1597_cov65_14100	Nmel03440	Vertebrata	EOG091G0ETI
scaffold1597_cov65_14100	Nmel03491	Hymenoptera	EOG091G0DVO
scaffold1597_cov65_14100	Nmel04257	Apoidea	EOG091G07IX
scaffold1597_cov65_14100	Nmel04293	Unique
scaffold1597_cov65_14100	Nmel05034	Vertebrata	EOG091G0LVA
scaffold1597_cov65_14100	Nmel05035	Vertebrata	EOG091G0LVA
scaffold1597_cov65_14100	Nmel05192	Vertebrata	EOG091G0DF7
scaffold1597_cov65_14100	Nmel05353	Vertebrata	EOG091G0CQZ
scaffold1597_cov65_14100	Nmel05382	Vertebrata	EOG091G0BT5
scaffold1597_cov65_14100	Nmel05389	Vertebrata	EOG091G0BD2
scaffold1597_cov65_14100	Nmel05890	Unique
scaffold1597_cov65_14100	Nmel06121	Vertebrata	EOG091G17T1
scaffold1597_cov65_14100	Nmel06316	Vertebrata	EOG091G00R9
scaffold1597_cov65_14100	Nmel06574	Unique
scaffold1597_cov65_14100	Nmel06605	Vertebrata	EOG091G1BN0
scaffold1597_cov65_14100	Nmel06895	Vertebrata	EOG091G08N7
scaffold1597_cov65_14100	Nmel07058	Metazoa	EOG091G0STB
scaffold1597_cov65_14100	Nmel07079	Insecta	EOG091G01J8
scaffold1597_cov65_14100	Nmel07095	Vertebrata	EOG091G0HN3
scaffold1597_cov65_14100	Nmel07213	Holometabola	EOG091G10FX
scaffold1597_cov65_14100	Nmel07391	Vertebrata	EOG091G0QWR
scaffold1597_cov65_14100	Nmel07411	Vertebrata	EOG091G0PBB
scaffold1597_cov65_14100	Nmel07541	Vertebrata	EOG091G080M
scaffold1597_cov65_14100	Nmel07593	Vertebrata	EOG091G0AWJ
scaffold1597_cov65_14100	Nmel07606	Vertebrata	EOG091G06DV
scaffold1597_cov65_14100	Nmel07652	Vertebrata	EOG091G024S
scaffold1597_cov65_14100	Nmel07661	Vertebrata	EOG091G00FE
scaffold1597_cov65_14100	Nmel07776	Arthropoda	EOG091G13OO
scaffold1597_cov65_14100	Nmel07847	Vertebrata	EOG091G0K4I
scaffold1597_cov65_14100	Nmel08579	Vertebrata	EOG091G0FFX
scaffold1597_cov65_14100	Nmel08801	Vertebrata	EOG091G0YCF
scaffold1597_cov65_14100	Nmel08924	Metazoa	EOG091G08JJ
scaffold1597_cov65_14100	Nmel09581	Metazoa	EOG091G0960
scaffold1597_cov65_14100	Nmel09615	Vertebrata	EOG091G03EW
scaffold1597_cov65_14100	Nmel09659	Unique
scaffold1597_cov65_14100	Nmel09997	Vertebrata	EOG091G142D
scaffold1597_cov65_14100	Nmel10026	Vertebrata	EOG091G09L2
scaffold1597_cov65_14100	Nmel10049	Insecta	EOG091G0B7O
scaffold1597_cov65_14100	Nmel10440	Vertebrata	EOG091G0R20
scaffold1597_cov65_14100	Nmel10443	Vertebrata	EOG091G0WH7
scaffold1597_cov65_14100	Nmel10560	Metazoa	EOG091G0SRY
scaffold1597_cov65_14100	Nmel10629	Vertebrata	EOG091G0FXV
scaffold1597_cov65_14100	Nmel10639	Arthropoda	EOG091G11S4
scaffold1597_cov65_14100	Nmel10836	Vertebrata	EOG091G050S
scaffold1597_cov65_14100	Nmel10844	Unique
scaffold16246_cov65_24082	Nmel02234	Vertebrata	EOG091G0BL2
scaffold16246_cov65_24082	Nmel02674	Vertebrata	EOG091G0T4J
scaffold16246_cov65_24082	Nmel02697	Vertebrata	EOG091G03YH
scaffold16246_cov65_24082	Nmel03846	Unique
scaffold16246_cov65_24082	Nmel05959	Metazoa	EOG091G02P4
scaffold16246_cov65_24082	Nmel06351	Unique
scaffold16246_cov65_24082	Nmel08012	Vertebrata	EOG091G0J2B
scaffold16246_cov65_24082	Nmel08292	Unique
scaffold16246_cov65_24082	Nmel10422	Arthropoda	EOG091G0M16
scaffold1775_cov63_14702	Nmel00265	Hymenoptera	EOG091G15WN
scaffold1775_cov63_14702	Nmel00728	Vertebrata	EOG091G0DTV
scaffold1775_cov63_14702	Nmel02452	Vertebrata	EOG091G0PW2
scaffold1775_cov63_14702	Nmel03967	Metazoa	EOG091G0BW8
scaffold1775_cov63_14702	Nmel08308	Metazoa	EOG091G1PP4
scaffold1775_cov63_14702	Nmel08315	Vertebrata	EOG091G0D1E
scaffold1775_cov63_14702	Nmel08420	Insecta	EOG091G11J5
scaffold1775_cov63_14702	Nmel10561	Vertebrata	EOG091G06JB
scaffold1859_cov62_15584	Nmel04521	Insecta	EOG091G0U11
scaffold1859_cov62_15584	Nmel04984	Hymenoptera	EOG091G0SBT
scaffold1859_cov62_15584	Nmel06480	Vertebrata	EOG091G0CQZ
scaffold1859_cov62_15584	Nmel10617	Vertebrata	EOG091G0O6A
scaffold18_cov64_242	Nmel04271	Vertebrata	EOG091G0UIC
scaffold18_cov64_242	Nmel04769	Vertebrata	EOG091G0UZ0
scaffold225_cov57_3490	Nmel02164	Unique
scaffold225_cov57_3490	Nmel03303	Vertebrata	EOG091G03AV
scaffold225_cov57_3490	Nmel03459	Vertebrata	EOG091G12OH
scaffold225_cov57_3490	Nmel04174	Metazoa	EOG091G0UJD
scaffold225_cov57_3490	Nmel04522	Vertebrata	EOG091G00N7
scaffold225_cov57_3490	Nmel05193	Vertebrata	EOG091G0BY8
scaffold225_cov57_3490	Nmel05827	Vertebrata	EOG091G0N2V
scaffold225_cov57_3490	Nmel05896	Vertebrata	EOG091G0FHS
scaffold225_cov57_3490	Nmel06247	Vertebrata	EOG091G0Y8F
scaffold225_cov57_3490	Nmel08763	Vertebrata	EOG091G00F1
scaffold225_cov57_3490	Nmel09171	Metazoa	EOG091G0B11
scaffold225_cov57_3490	Nmel09665	Vertebrata	EOG091G01J6
scaffold225_cov57_3490	Nmel10172	Aculeata	EOG091G0IYW
scaffold225_cov57_3587	Nmel00044	Metazoa	EOG091G02VI
scaffold225_cov57_3587	Nmel00171	Metazoa	EOG091G0IZ5
scaffold225_cov57_3587	Nmel00177	Vertebrata	EOG091G00JL
scaffold225_cov57_3587	Nmel00193	Metazoa	EOG091G080V
scaffold225_cov57_3587	Nmel00431	Insecta	EOG091G0ZZY
scaffold225_cov57_3587	Nmel00528	Vertebrata	EOG091G0638
scaffold225_cov57_3587	Nmel00586	Vertebrata	EOG091G0SM9
scaffold225_cov57_3587	Nmel00658	Vertebrata	EOG091G0XMM
scaffold225_cov57_3587	Nmel00662	Hymenoptera	EOG091G0CCG
scaffold225_cov57_3587	Nmel00885	Vertebrata	EOG091G0UMX
scaffold225_cov57_3587	Nmel00893	Metazoa	EOG091G0YKC
scaffold225_cov57_3587	Nmel00905	Unique
scaffold225_cov57_3587	Nmel00922	Insecta	EOG091G0XEF
scaffold225_cov57_3587	Nmel00928	Unique
scaffold225_cov57_3587	Nmel01147	Vertebrata	EOG091G05O8
scaffold225_cov57_3587	Nmel01517	Vertebrata	EOG091G00LX
scaffold225_cov57_3587	Nmel01521	Unique
scaffold225_cov57_3587	Nmel01541	Unique
scaffold225_cov57_3587	Nmel01544	Vertebrata	EOG091G08QL
scaffold225_cov57_3587	Nmel01559	Vertebrata	EOG091G0AH5
scaffold225_cov57_3587	Nmel02095	Vertebrata	EOG091G0KTD
scaffold225_cov57_3587	Nmel02130	Metazoa	EOG091G0269
scaffold225_cov57_3587	Nmel02131	Metazoa	EOG091G1Q2Q
scaffold225_cov57_3587	Nmel02154	Vertebrata	EOG091G0OFF
scaffold225_cov57_3587	Nmel02165	Vertebrata	EOG091G0WC1
scaffold225_cov57_3587	Nmel02169	Unique
scaffold225_cov57_3587	Nmel02294	Vertebrata	EOG091G0E7K
scaffold225_cov57_3587	Nmel02573	Vertebrata	EOG091G15HU
scaffold225_cov57_3587	Nmel02669	Vertebrata	EOG091G0825
scaffold225_cov57_3587	Nmel02681	Vertebrata	EOG091G0MVL
scaffold225_cov57_3587	Nmel02752	Vertebrata	EOG091G00IN
scaffold225_cov57_3587	Nmel02788	Arthropoda	EOG091G0KTY
scaffold225_cov57_3587	Nmel02850	Metazoa	EOG091G0OW8
scaffold225_cov57_3587	Nmel02966	Unique
scaffold225_cov57_3587	Nmel03080	Vertebrata	EOG091G00KX
scaffold225_cov57_3587	Nmel03266	Metazoa	EOG091G0GDW
scaffold225_cov57_3587	Nmel03272	Vertebrata	EOG091G0FEB
scaffold225_cov57_3587	Nmel03335	Vertebrata	EOG091G0G9L
scaffold225_cov57_3587	Nmel03391	Vertebrata	EOG091G0LKW
scaffold225_cov57_3587	Nmel03399	Vertebrata	EOG091G01WX
scaffold225_cov57_3587	Nmel03421	Metazoa	EOG091G0VPA
scaffold225_cov57_3587	Nmel03732	Vertebrata	EOG091G0BWL
scaffold225_cov57_3587	Nmel04065	Hymenoptera	EOG091G0W2P
scaffold225_cov57_3587	Nmel04114	Vertebrata	EOG091G09FA
scaffold225_cov57_3587	Nmel04137	Metazoa	EOG091G07GR
scaffold225_cov57_3587	Nmel04197	Vertebrata	EOG091G06TP
scaffold225_cov57_3587	Nmel04281	Unique
scaffold225_cov57_3587	Nmel04317	Vertebrata	EOG091G080A
scaffold225_cov57_3587	Nmel04483	Vertebrata	EOG091G02PG
scaffold225_cov57_3587	Nmel04695	Insecta	EOG091G1COT
scaffold225_cov57_3587	Nmel04845	Vertebrata	EOG091G12E7
scaffold225_cov57_3587	Nmel04856	Vertebrata	EOG091G03YY
scaffold225_cov57_3587	Nmel04956	Vertebrata	EOG091G0137
scaffold225_cov57_3587	Nmel04982	Vertebrata	EOG091G0KUV
scaffold225_cov57_3587	Nmel05068	Vertebrata	EOG091G0170
scaffold225_cov57_3587	Nmel05161	Vertebrata	EOG091G0BUO
scaffold225_cov57_3587	Nmel05169	Vertebrata	EOG091G11OI
scaffold225_cov57_3587	Nmel05305	Unique
scaffold225_cov57_3587	Nmel05306	Vertebrata	EOG091G02QS
scaffold225_cov57_3587	Nmel05725	Vertebrata	EOG091G0LZ2
scaffold225_cov57_3587	Nmel05827	Vertebrata	EOG091G0N2V
scaffold225_cov57_3587	Nmel05865	Vertebrata	EOG091G022X
scaffold225_cov57_3587	Nmel06316	Vertebrata	EOG091G00R9
scaffold225_cov57_3587	Nmel06319	Vertebrata	EOG091G0DUW
scaffold225_cov57_3587	Nmel06449	Vertebrata	EOG091G0WNB
scaffold225_cov57_3587	Nmel06569	Vertebrata	EOG091G0LHF
scaffold225_cov57_3587	Nmel07121	Vertebrata	EOG091G0TRP
scaffold225_cov57_3587	Nmel07320	Vertebrata	EOG091G01Z0
scaffold225_cov57_3587	Nmel07323	Vertebrata	EOG091G02N5
scaffold225_cov57_3587	Nmel07344	Vertebrata	EOG091G0LMB
scaffold225_cov57_3587	Nmel07388	Vertebrata	EOG091G08PX
scaffold225_cov57_3587	Nmel07465	Vertebrata	EOG091G02TX
scaffold225_cov57_3587	Nmel07470	Vertebrata	EOG091G0GYP
scaffold225_cov57_3587	Nmel07487	Unique
scaffold225_cov57_3587	Nmel07607	Unique
scaffold225_cov57_3587	Nmel07659	Vertebrata	EOG091G0A4V
scaffold225_cov57_3587	Nmel07730	Unique
scaffold225_cov57_3587	Nmel07742	Vertebrata	EOG091G0RR2
scaffold225_cov57_3587	Nmel08014	Vertebrata	EOG091G057D
scaffold225_cov57_3587	Nmel08106	Vertebrata	EOG091G189W
scaffold225_cov57_3587	Nmel08312	Vertebrata	EOG091G083I
scaffold225_cov57_3587	Nmel08313	Vertebrata	EOG091G0O9R
scaffold225_cov57_3587	Nmel08571	Vertebrata	EOG091G1600
scaffold225_cov57_3587	Nmel08683	Vertebrata	EOG091G0VUT
scaffold225_cov57_3587	Nmel08783	Metazoa	EOG091G0R0M
scaffold225_cov57_3587	Nmel08909	Unique
scaffold225_cov57_3587	Nmel08913	Hymenoptera	EOG091G18KK
scaffold225_cov57_3587	Nmel08921	Hymenoptera	EOG091G12O1
scaffold225_cov57_3587	Nmel08923	Vertebrata	EOG091G07ZU
scaffold225_cov57_3587	Nmel09006	Arthropoda	EOG091G0HIZ
scaffold225_cov57_3587	Nmel09014	Vertebrata	EOG091G06VI
scaffold225_cov57_3587	Nmel09023	Vertebrata	EOG091G0O9K
scaffold225_cov57_3587	Nmel09227	Unique
scaffold225_cov57_3587	Nmel09658	Vertebrata	EOG091G0BDG
scaffold225_cov57_3587	Nmel09774	Vertebrata	EOG091G0DOY
scaffold225_cov57_3587	Nmel09901	Vertebrata	EOG091G0QST
scaffold225_cov57_3587	Nmel10095	Vertebrata	EOG091G0J2O
scaffold225_cov57_3587	Nmel10161	Vertebrata	EOG091G0KA2
scaffold225_cov57_3587	Nmel10561	Vertebrata	EOG091G06JB
scaffold225_cov57_3587	Nmel10563	Vertebrata	EOG091G01IL
scaffold225_cov57_3587	Nmel10639	Arthropoda	EOG091G11S4
scaffold225_cov57_3587	Nmel10836	Vertebrata	EOG091G050S
scaffold2648_cov63_17345	Nmel02723	Vertebrata	EOG091G022L
scaffold2648_cov63_17345	Nmel07255	Unique
scaffold2648_cov63_17345	Nmel07678	Vertebrata	EOG091G00OZ
scaffold302_cov64_4663	Nmel02655	Vertebrata	EOG091G0X24
scaffold302_cov64_4663	Nmel02914	Vertebrata	EOG091G02V0
scaffold302_cov64_4663	Nmel02992	Hymenoptera	EOG091G197B
scaffold302_cov64_4663	Nmel03740	Vertebrata	EOG091G09D3
scaffold302_cov64_4663	Nmel04350	Unique
scaffold302_cov64_4663	Nmel09978	Vertebrata	EOG091G0HK9
scaffold31323_cov63_24558	Nmel02673	Metazoa	EOG091G09NH
scaffold31323_cov63_24558	Nmel06341	Vertebrata	EOG091G0DHC
scaffold31323_cov63_24558	Nmel08487	Unique
scaffold31323_cov63_24558	Nmel09875	Vertebrata	EOG091G0A08
scaffold4597_cov63_20394	Nmel00529	Unique
scaffold4597_cov63_20394	Nmel00536	Vertebrata	EOG091G003Y
scaffold4597_cov63_20394	Nmel00664	Vertebrata	EOG091G01V0
scaffold4597_cov63_20394	Nmel01371	Vertebrata	EOG091G084B
scaffold4597_cov63_20394	Nmel01372	Unique
scaffold4597_cov63_20394	Nmel01509	Arthropoda	EOG091G0YQ0
scaffold4597_cov63_20394	Nmel01671	Vertebrata	EOG091G1TN8
scaffold4597_cov63_20394	Nmel01865	Vertebrata	EOG091G005W
scaffold4597_cov63_20394	Nmel02307	Vertebrata	EOG091G1IAA
scaffold4597_cov63_20394	Nmel03215	Hymenoptera	EOG091G0DJG
scaffold4597_cov63_20394	Nmel03218	Vertebrata	EOG091G04BO
scaffold4597_cov63_20394	Nmel03383	Vertebrata	EOG091G17EE
scaffold4597_cov63_20394	Nmel03630	Vertebrata	EOG091G0NU5
scaffold4597_cov63_20394	Nmel03837	Insecta	EOG091G1B12
scaffold4597_cov63_20394	Nmel03978	Vertebrata	EOG091G05N0
scaffold4597_cov63_20394	Nmel04229	Vertebrata	EOG091G06L1
scaffold4597_cov63_20394	Nmel04695	Insecta	EOG091G1COT
scaffold4597_cov63_20394	Nmel04752	Unique
scaffold4597_cov63_20394	Nmel05816	Vertebrata	EOG091G0N2V
scaffold4597_cov63_20394	Nmel05836	Metazoa	EOG091G03UO
scaffold4597_cov63_20394	Nmel06469	Vertebrata	EOG091G03TZ
scaffold4597_cov63_20394	Nmel06790	Metazoa	EOG091G1JKR
scaffold4597_cov63_20394	Nmel07004	Vertebrata	EOG091G0YBS
scaffold4597_cov63_20394	Nmel07128	Vertebrata	EOG091G066I
scaffold4597_cov63_20394	Nmel07506	Vertebrata	EOG091G15W0
scaffold4597_cov63_20394	Nmel07622	Vertebrata	EOG091G0EJW
scaffold4597_cov63_20394	Nmel08004	Metazoa	EOG091G0F1J
scaffold4597_cov63_20394	Nmel08997	Vertebrata	EOG091G0RMA
scaffold4597_cov63_20394	Nmel09091	Metazoa	EOG091G07Z2
scaffold4597_cov63_20394	Nmel09620	Unique
scaffold4597_cov63_20394	Nmel10178	Vertebrata	EOG091G067T
scaffold4597_cov63_20394	Nmel10200	Vertebrata	EOG091G01O6
scaffold4597_cov63_20394	Nmel10222	Metazoa	EOG091G12RF
scaffold50374_cov38_25002	Nmel01360	Hymenoptera	EOG091G0TM3
scaffold50374_cov38_25002	Nmel01521	Unique
scaffold50374_cov38_25002	Nmel02065	Vertebrata	EOG091G05MZ
scaffold50374_cov38_25002	Nmel02729	Vertebrata	EOG091G13BH
scaffold50374_cov38_25002	Nmel03303	Vertebrata	EOG091G03AV
scaffold50374_cov38_25002	Nmel03996	Vertebrata	EOG091G0966
scaffold50374_cov38_25002	Nmel04422	Unique
scaffold50374_cov38_25002	Nmel05797	Vertebrata	EOG091G177R
scaffold50374_cov38_25002	Nmel07652	Vertebrata	EOG091G024S
scaffold50374_cov38_25002	Nmel07675	Vertebrata	EOG091G05HI
scaffold50374_cov38_25002	Nmel08190	Metazoa	EOG091G0QUA
scaffold50374_cov38_25002	Nmel08924	Metazoa	EOG091G08JJ
scaffold50374_cov38_25002	Nmel08925	Metazoa	EOG091G0GXC
scaffold50374_cov38_25002	Nmel10591	Vertebrata	EOG091G0MPE
scaffold70_cov64_723	Nmel00404	Insecta	EOG091G0ALD
scaffold70_cov64_723	Nmel01068	Vertebrata	EOG091G08H2
scaffold70_cov64_723	Nmel01194	Vertebrata	EOG091G06DG
scaffold70_cov64_723	Nmel01221	Vertebrata	EOG091G02KC
scaffold70_cov64_723	Nmel03365	Unique
scaffold70_cov64_723	Nmel04079	Vertebrata	EOG091G0Q0V
scaffold70_cov64_723	Nmel04184	Metazoa	EOG091G0L74
scaffold70_cov64_723	Nmel06291	Vertebrata	EOG091G1CPI
scaffold70_cov64_723	Nmel10130	Hymenoptera	EOG091G13JM
scaffold811_cov64_7566	Nmel07916	Hymenoptera	EOG091G0YO4
scaffold811_cov64_7811	Nmel01247	Vertebrata	EOG091G020R
scaffold811_cov64_7811	Nmel05828	Vertebrata	EOG091G0N2V
scaffold811_cov64_7811	Nmel07774	Vertebrata	EOG091G061L
scaffold863_cov64_9135	Nmel00669	Vertebrata	EOG091G00YL
scaffold863_cov64_9135	Nmel02531	Vertebrata	EOG091G0N0L
scaffold863_cov64_9135	Nmel02835	Vertebrata	EOG091G16AJ
scaffold863_cov64_9135	Nmel04992	Vertebrata	EOG091G0P8S
scaffold863_cov64_9135	Nmel07255	Unique
scaffold863_cov64_9135	Nmel07828	Vertebrata	EOG091G04TZ
scaffold863_cov64_9135	Nmel08392	Aculeata	EOG091G1BKY
scaffold863_cov64_9135	Nmel10032	Vertebrata	EOG091G12OH
scaffold969_cov63_9710	Nmel01522	Unique
scaffold969_cov63_9710	Nmel01942	Vertebrata	EOG091G0E4P
scaffold969_cov63_9710	Nmel02611	Unique
scaffold969_cov63_9710	Nmel03036	Vertebrata	EOG091G05QM
scaffold969_cov63_9710	Nmel05821	Vertebrata	EOG091G0B0I
scaffold969_cov63_9710	Nmel06049	Metazoa	EOG091G0LXP
scaffold969_cov63_9710	Nmel06525	Vertebrata	EOG091G09M0
scaffold969_cov63_9710	Nmel06534	Vertebrata	EOG091G0M1S
scaffold969_cov63_9710	Nmel06535	Vertebrata	EOG091G0HLV
scaffold969_cov63_9710	Nmel06699	Unique
scaffold969_cov63_9710	Nmel06994	Vertebrata	EOG091G0RWM
scaffold969_cov63_9710	Nmel07706	Vertebrata	EOG091G022R
scaffold969_cov63_9710	Nmel08339	Unique
scaffold969_cov63_9710	Nmel08344	Vertebrata	EOG091G0TNY
scaffold969_cov63_9710	Nmel08360	Vertebrata	EOG091G0F0I
scaffold969_cov63_9710	Nmel08369	Vertebrata	EOG091G08A9
scaffold969_cov63_9710	Nmel08984	Vertebrata	EOG091G0XY5
scaffold969_cov63_9710	Nmel09603	Vertebrata	EOG091G04T1
